# Supplementary material for: Synthesis and HDAC inhibitory activity of pyrimidine-based hydroxamic acids
Source: publisher site journal article supplement (doi:10.3762/bjoc.18.84), 2022-07-13
Supplement: Additional file 1 [file 1860-5397-18-84-S1.pdf]

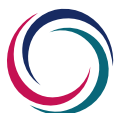

## Supporting Information

for

### **Synthesis and HDAC inhibitory activity of pyrimidine-based hydroxamic acids**

Virginija Jakubkiene, Gabrielius Ernis Valiulis, Markus Schweipert, Asta Zubriene, Daumantas Matulis, Franz-Josef Meyer-Almes and Sigitas Tumkevicius

*Beilstein J. Org. Chem.* **2022**, *18*, 837–844. [doi:10.3762/bjoc.18.84](https://doi.org/10.3762/bjoc.18.84)

### **Compounds characterization and analytical data; HDAC enzyme activity assay; references; NMR spectra**

## **Table of contents**

|                                                      |    |
|------------------------------------------------------|----|
| Compounds characterization and analytical data ..... | S2 |
| HDAC enzyme activity assay .....                     | S7 |
| References.....                                      | S7 |
| Copies of NMR spectra.....                           | S8 |

## Compounds characterization and analytical data

*Ethyl [6-methyl-2-(methylthio)pyrimidin-4-yloxy]acetate (3)*. White crystals; yield 0.17 g (73%); mp 52–53 °C; <sup>1</sup>H NMR (CDCl<sub>3</sub>): δ 6.37 (s, 1H, CH), 4.87 (s, 2H, OCH<sub>2</sub>), 4.23 (q, *J* = 7.2 Hz, 2H, CH<sub>2</sub>), 2.47 (s, 3H, SCH<sub>3</sub>), 2.38 (s, 3H, CH<sub>3</sub>), 1.26 (t, *J* = 7.2 Hz, 3H, CH<sub>3</sub>); <sup>13</sup>C NMR (CDCl<sub>3</sub>): δ 171.4, 168.5 (2), 168.2, 102.1, 62.8, 61.4, 23.9, 14.3, 14.0; HRMS calcd for C<sub>10</sub>H<sub>14</sub>N<sub>2</sub>O<sub>3</sub>S: [M + H]<sup>+</sup> = 243.0798, found: 243.0797.

*Ethyl [2-(ethylthio)-6-methylpyrimidin-4-yloxy]acetate (4)*. White crystals; yield 0.18 g (70%); mp 50–52 °C; <sup>1</sup>H NMR (CDCl<sub>3</sub>): δ 6.36 (s, 1H, CH), 4.86 (s, 2H, OCH<sub>2</sub>), 4.22 (q, *J* = 7.2 Hz, 2H, CH<sub>2</sub>), 3.05 (q, *J* = 7.2 Hz, 2H, SCH<sub>2</sub>), 2.37 (s, 3H, CH<sub>3</sub>), 1.34 (t, *J* = 7.2 Hz, 3H, CH<sub>3</sub>), 1.27 (t, *J* = 7.2 Hz, 3H, CH<sub>3</sub>); <sup>13</sup>C NMR (CDCl<sub>3</sub>): δ 171.0, 168.6, 168.5, 168.2, 102.1, 62.7, 61.5, 25.2, 23.9, 14.8, 14.3; HRMS calcd for C<sub>11</sub>H<sub>16</sub>N<sub>2</sub>O<sub>3</sub>S: [M + H]<sup>+</sup> = 257.0954, found: 257.0954.

*Ethyl [6-methyl-2-(methylsulfonyl)pyrimidin-4-yloxy]acetate (5)*

A mixture of compound **3** (0.242g, 1 mmol) and oxone (1.54 g, 2.5 mmol) in dry DMF (2 mL) was stirred at 40 °C for 0.5 h, then cooled to room temperature, and poured into ice water. The resultant precipitate collected by filtration, washed with water, and dried to give white solid, yield 0.214 g (78%); mp 83–85 °C; <sup>1</sup>H NMR (CDCl<sub>3</sub>): δ 6.88 (s, 1H, CH), 4.98 (s, 2H, OCH<sub>2</sub>), 4.24 (q, *J* = 7.2 Hz, 2H, CH<sub>2</sub>), 3.27 (s, 3H, SO<sub>2</sub>CH<sub>3</sub>), 2.58 (s, 3H, CH<sub>3</sub>), 1.28 (t, *J* = 7.2 Hz, 3H, CH<sub>3</sub>); <sup>13</sup>C NMR (CDCl<sub>3</sub>): δ 170.3, 169.7, 167.6, 164.6, 109.9, 63.6, 61.9, 39.1, 24.1, 14.3; HRMS calcd for C<sub>10</sub>H<sub>14</sub>N<sub>2</sub>O<sub>5</sub>S: [M + H]<sup>+</sup> = 275.0696, found: 275.0691.

*Ethyl [2-(allylamino)-6-methylpyrimidin-4-yloxy]acetate (6)*. White crystals; yield 0.203 g (81%); mp 108–110 °C; <sup>1</sup>H NMR (CDCl<sub>3</sub>): δ 6.01 (s, 1H, CH), 5.95–5.82 (m, 1H, CH=), 5.41 (very br. s, 1H, NH), 5.20 (d, *J* = 17.2 Hz, 1H, CH<sub>2</sub>=), 5.09 (d, *J* = 10.0 Hz, 1H, CH<sub>2</sub>=), 4.79 (s, 2H, OCH<sub>2</sub>), 4.21 (q, *J* = 7.2 Hz, 2H, CH<sub>2</sub>), 4.04–3.91 (m, 2H, NHCH<sub>2</sub>), 2.26 (s, 3H, CH<sub>3</sub>), 1.26 (t, *J* = 7.2 Hz, 3H, CH<sub>3</sub>); <sup>13</sup>C NMR (CDCl<sub>3</sub>): δ 169.5, 168.9, 168.6, 161.6, 135.2, 115.8, 96.1, 62.5, 61.3, 43.9, 23.7, 14.3; HRMS calcd for C<sub>12</sub>H<sub>17</sub>N<sub>3</sub>O<sub>3</sub>: [M + H]<sup>+</sup> = 252.1343, found: 252.1343.

*Ethyl [2-(benzylamino)-6-methylpyrimidin-4-yloxy]acetate (7)*. White crystals; yield 0.245 g (81%); mp 117–119 °C; <sup>1</sup>H NMR (CDCl<sub>3</sub>): δ 7.36–7.20 (m, 5H, C<sub>6</sub>H<sub>5</sub>), 6.03 (s, 1H, CH), 5.55 (very br. s, 1H, NH), 4.76 (s, 2H, OCH<sub>2</sub>), 4.55 (d, *J* = 6 Hz, 2H, NHCH<sub>2</sub>), 4.13 (q, *J* = 7 Hz, 2H, CH<sub>2</sub>), 2.27 (s, 3H, CH<sub>3</sub>), 1.21 (t, *J* = 7 Hz, 3H, CH<sub>3</sub>); <sup>13</sup>C NMR (CDCl<sub>3</sub>): δ 169.5, 168.9, 168.8, 161.7, 139.5, 128.7, 127.5, 127.3, 96.3, 62.4, 61.2, 45.5, 23.9, 14.3; HRMS calcd for C<sub>16</sub>H<sub>19</sub>N<sub>3</sub>O<sub>3</sub>: [M + H]<sup>+</sup> = 302.1499, found: 302.1499.

*Ethyl [2-(dimethylamino)-6-methylpyrimidin-4-yloxy]acetate (8)*. White crystals; yield 0.168 g (70%); mp 58–60 °C; <sup>1</sup>H NMR (CDCl<sub>3</sub>): δ 5.93 (s, 1H, CH), 4.77 (s, 2H, OCH<sub>2</sub>), 4.21 (q, *J* = 7.2 Hz, 2H, CH<sub>2</sub>), 3.10 (s, 6H, N(CH<sub>3</sub>)<sub>2</sub>), 2.27 (s, 3H, CH<sub>3</sub>), 1.25 (t, *J* = 7.2 Hz, 3H, CH<sub>3</sub>); <sup>13</sup>C NMR (CDCl<sub>3</sub>): δ 169.3, 168.8, 168.6, 161.8, 94.2, 62.4, 61.1, 36.9, 24.3, 14.3; HRMS calcd for C<sub>11</sub>H<sub>17</sub>N<sub>3</sub>O<sub>3</sub>: [M + H]<sup>+</sup> = 240.1343, found: 240.1343.

*Ethyl [6-methyl-2-(pyrrolidin-1-yl)pyrimidin-4-yloxy]acetate (9)*. White crystals; yield 0.241 g (91%); mp 85–87 °C; <sup>1</sup>H NMR (CDCl<sub>3</sub>): δ 5.94 (s, 1H, CH), 4.79 (s, 2H, OCH<sub>2</sub>), 4.21 (q, *J* = 7.2

Hz, 2H, CH<sub>2</sub>), 3.50 (br. s, 4H, N(CH<sub>2</sub>)<sub>2</sub>), 2.28 (s, 3H, CH<sub>3</sub>), 1.98–1.86 (m, 4H, (CH<sub>2</sub>)<sub>2</sub>), 1.25 (t, *J* = 7.2 Hz, 3H, CH<sub>3</sub>); <sup>13</sup>C NMR (CDCl<sub>3</sub>): δ 169.3, 168.8, 168.6, 159.9, 94.2, 62.4, 61.1, 46.6, 25.6, 24.3, 14.3; HRMS calcd for C<sub>13</sub>H<sub>19</sub>N<sub>3</sub>O<sub>3</sub>: [M + H]<sup>+</sup> = 266.1499, found: 266.1499.

*6-Methyluracil (10)*. Method A. White powder; yield 0.05 g (40%); mp 320 °C (decomp.) (320 °C lit. [1]); <sup>1</sup>H NMR (DMSO-*d*<sub>6</sub>): δ 10.87 (s, 1H, NH); 10.81 (s, 1H, NH); 5.31 (s, 1H, CH), 2.00 (s, 3H, CH<sub>3</sub>); <sup>13</sup>C NMR (DMSO-*d*<sub>6</sub>): δ 164.1, 152.9, 151.6, 98.7, 18.2.

Method B. White powder; yield 0.07 g (56%) , mp 320 °C (decomp).

*Ethyl (6-methyl-2-oxo-1,2-dihydropyrimidin-4-yloxy)acetate (11)*. White powder; R<sub>f</sub> 0.5 (chloroform : ethyl acetate : methanol – 4 : 1 : 1); yield 0.155 g (73%); mp 210–212 °C (197 °C lit.[2]); <sup>1</sup>H NMR (CDCl<sub>3</sub>): δ 12.85 (br. s, 1H, NH), 5.89 (s, 1H, CH), 4.97 (s, 2H, OCH<sub>2</sub>), 4.22 (q, *J* = 7.2 Hz, 2H, CH<sub>2</sub>), 2.32 (s, 3H, CH<sub>3</sub>), 1.27 (t, *J* = 7.2 Hz, 3H, CH<sub>3</sub>); <sup>13</sup>C NMR (CDCl<sub>3</sub>): δ 172.3, 167.9, 160.3, 157.6, 94.8, 62.6, 61.6, 18.9, 14.2; HRMS calcd for C<sub>9</sub>H<sub>12</sub>N<sub>2</sub>O<sub>4</sub>: [M + H]<sup>+</sup> = 213.0870, found: 213.0869.

*N-Hydroxy-(6-methyl-2-(methylthio)pyrimidin-4-yloxy)acetamide (12)*. Reaction time 1 h; white solid; yield 0.186 g (81%); mp 182–184 °C; <sup>1</sup>H NMR (DMSO-*d*<sub>6</sub>): δ 10.78 and 10.21 (2s, 1H, NH), 9.29 and 8.97 (2s, 1H, OH), 6.53 (s, 1H, CH), 5.07 and 4.72 (2s, 2H, OCH<sub>2</sub>), 2.45 (s, 3H, SCH<sub>3</sub>), 2.32 (s, 3H, CH<sub>3</sub>) 1.28 (t, *J* = 8 Hz, 3H, CH<sub>3</sub>); <sup>13</sup>C NMR (DMSO-*d*<sub>6</sub>): δ 170.2, 168.1 (2), 164.0, 102.1, 62.8, 23.3, 13.4; HRMS calcd for C<sub>8</sub>H<sub>11</sub>N<sub>3</sub>O<sub>3</sub>S: [M + H]<sup>+</sup> = 230.0594, found: 230.0594.

*[2-(Ethylthio)-6-methylpyrimidin-4-yloxy]-N-hydroxyacetamide (13)*. Reaction time 1 h; white solid; yield 0.177 g (73%); mp 175–176 °C; <sup>1</sup>H NMR (DMSO-*d*<sub>6</sub>): δ 10.76 and 10.21 (2s, 1H, NH), 9.25 and 8.94 (2s, 1H, OH), 6.53 (s, 1H, CH), 5.06 and 4.71 (2s, 2H, OCH<sub>2</sub>), 3.04 (q, *J* = 8 Hz, 2H, CH<sub>2</sub>), 2.31 (s, 3H, CH<sub>3</sub>); <sup>13</sup>C NMR (DMSO-*d*<sub>6</sub>): δ 169.8, 168.1 (2), 164.0, 102.2, 62.7, 24.4, 23.3, 14.7; HRMS calcd for C<sub>9</sub>H<sub>13</sub>N<sub>3</sub>O<sub>3</sub>S: [M + H]<sup>+</sup> = 244.0750, found: 244.0748.

*[2-(Allylamino)-6-methylpyrimidin-4-yloxy]-N-hydroxyacetamide (14)*. Reaction time 4 h; white solid; yield 0.162 g (68%); mp 177–179 °C; <sup>1</sup>H NMR (DMSO-*d*<sub>6</sub>): δ 10.71 and 10.12 (2s, 1H, NH), 8.94 (br. s, 1H, OH), 6.02–5.78 (m, 2H, CH, CH=), 5.15 (dd, *J* = 17.2 and 1.2 Hz, 1H, CH<sub>2</sub>=), 5.02 (dd, *J* = 10.2 and 1.4 Hz, 1H, CH<sub>2</sub>=), 4.94 and 4.62 (2s, 2H, OCH<sub>2</sub>), 3.85 (br. s, 2H, NHCH<sub>2</sub>), 2.15 (s, 3H, CH<sub>3</sub>); <sup>13</sup>C NMR (DMSO-*d*<sub>6</sub>): δ 168.9, 168.0, 164.4, 161.6, 136.1, 115.0, 94.6, 62.1, 43.1, 23.5; HRMS calcd for C<sub>10</sub>H<sub>14</sub>N<sub>4</sub>O<sub>3</sub>: [M + H]<sup>+</sup> = 239.1139, found: 239.1140.

*[2-(Benzylamino)-6-methylpyrimidin-4-yloxy]-N-hydroxyacetamide (15)*. Reaction time 96 h; white solid; yield 0.176 g (61%); mp 168–170 °C; <sup>1</sup>H NMR (DMSO-*d*<sub>6</sub>): δ 10.71 and 10.15 (2s, 1H, NH), 9.20 and 8.91 (2s, 1H, OH), 7.64 (br. s, 1H, NHCH<sub>2</sub>), 7.37–7.16 (m, 5H, C<sub>6</sub>H<sub>5</sub>), 5.94 (s, 1H, CH), 5.02 – 4.33 (m, 4H, OCH<sub>2</sub>, NHCH<sub>2</sub>), 2.15 (s, 3H, CH<sub>3</sub>); <sup>13</sup>C NMR (DMSO-*d*<sub>6</sub>): δ 168.9, 164.4, 161.7, 158.7, 140.6, 128.1, 127.5, 126.5, 94.9, 62.2, 44.0, 23.5; HRMS calcd for C<sub>14</sub>H<sub>16</sub>N<sub>4</sub>O<sub>3</sub>: [M + H]<sup>+</sup> = 289.1295, found: 289.1295.

*[2-(Dimethylamino)-6-methylpyrimidin-4-yloxy]-N-hydroxyacetamide (16)*. Reaction time 1 h; white solid; yield 0.174 g (77%); mp 192–194 °C; <sup>1</sup>H NMR (DMSO-*d*<sub>6</sub>): δ 10.73 and 10.11 (2s, 1H, NH), 9.22 and 8.89 (2s, 1H, OH), 5.93 (s, 1H, CH), 4.98 and 4.62 (2s, 2H, OCH<sub>2</sub>), 3.05 (s, 6H, (CH<sub>3</sub>)<sub>2</sub>), 2.19 (s, 3H, CH<sub>3</sub>); <sup>13</sup>C NMR (DMSO-*d*<sub>6</sub>): δ 168.5, 167.8, 164.6, 161.3, 93.8, 62.1, 36.4, 23.8; HRMS calcd for C<sub>9</sub>H<sub>14</sub>N<sub>4</sub>O<sub>3</sub>: [M + H]<sup>+</sup> = 227.1139, found: 227.1136.

*N*-Hydroxy-[6-methyl-2-(pyrrolidin-1-yl)pyrimidin-4-yloxy]acetamide (**17**). Reaction time 2 h; white solid; yield 0.176 g (70%); mp 178–180 °C; <sup>1</sup>H NMR (DMSO-*d*<sub>6</sub>): δ 10.69 and 10.08 (2s, 1H, NH), 9.17 and 8.87 (2s, 1H, OH), 5.93 (s, 1H, CH), 4.99 and 4.61 (2s, 2H, OCH<sub>2</sub>), 3.48–3.38 (m, 4H, N(CH<sub>2</sub>)<sub>2</sub>), 2.18 (s, 3H, CH<sub>3</sub>), 1.92–1.83 (m, 4H, (CH<sub>2</sub>)<sub>2</sub>); <sup>13</sup>C NMR (DMSO-*d*<sub>6</sub>): δ 168.5, 167.8, 164.6, 159.5, 93.8, 62.1, 46.1, 24.9, 23.7; HRMS calcd for C<sub>11</sub>H<sub>16</sub>N<sub>4</sub>O<sub>3</sub>: [M + H]<sup>+</sup> = 253.1295, found: 253.1297.

*N*-Hydroxy-(2-hydroxy-6-methylpyrimidin-4-yloxy)acetamide (**18**). Reaction time 1 h; white solid; yield 0.109 g (55%); mp 190–191 °C (decomp.); <sup>1</sup>H NMR (DMSO-*d*<sub>6</sub>): δ 11.39 (s, 1H, NH), 10.73 and 10.17 (2s, 1H, NH), 9.27 and 8.94 (2s, 1H, OH), 5.82 (s, 1H, CH), 4.97 and 4.61 (2s, 2H, OCH<sub>2</sub>), 2.14 (s, 3H, CH<sub>3</sub>); <sup>13</sup>C NMR (DMSO-*d*<sub>6</sub>): δ 171.1, 163.9, 157.2, 156.4, 92.6, 62.3, 18.0; HRMS calcd for C<sub>7</sub>H<sub>9</sub>N<sub>3</sub>O<sub>4</sub>: [M + H]<sup>+</sup> = 200.0666, found: 200.0671.

*Ethyl 4*-[6-methyl-2-(methylthio)pyrimidin-4-yloxy]butanoate (**20a**). Reaction time 4 h; isolated from a mixture of compounds **20a** and **20b**; R<sub>f</sub> 0.37 (cyclohexane – ethyl acetate 4:1); colourless oil; yield 0.111 g (41%); <sup>1</sup>H NMR (CDCl<sub>3</sub>): δ 6.18 (s, 1H, CH), 4.37 (t, *J* = 6.4 Hz, 2H, OCH<sub>2</sub>CH<sub>2</sub>), 4.12 (q, *J* = 7.2 Hz, 2H, OCH<sub>2</sub>CH<sub>3</sub>), 2.50 (s, 3H, SCH<sub>3</sub>), 2.43 (t, *J* = 7.4 Hz, 2H, CH<sub>2</sub>CO), 2.33 (s, 3H, CH<sub>3</sub>), 2.13–2.00 (m, 2H, CH<sub>2</sub>CH<sub>2</sub>CH<sub>2</sub>), 1.23 (t, *J* = 7.2 Hz, 3H, OCH<sub>2</sub>CH<sub>3</sub>); <sup>13</sup>C NMR (CDCl<sub>3</sub>): δ 173.1, 171.4, 169.2, 167.7, 102.1, 65.4, 60.6, 30.9, 24.3, 23.7, 14.3, 14.1; HRMS calcd for C<sub>12</sub>H<sub>18</sub>N<sub>2</sub>O<sub>3</sub>S: [M + H]<sup>+</sup> = 271.1111, found: 271.1108.

*Ethyl 4*-[6-methyl-2-(methylthio)-4-oxypyrimidin-3(4*H*)-yl]butanoate (**20b**). Reaction time 4 h; isolated from a mixture of compounds **20a** and **20b**; R<sub>f</sub> 0.17 (cyclohexane – ethylacetate 4:1); colourless oil; yield 0.084 g (31%); <sup>1</sup>H NMR (CDCl<sub>3</sub>): δ 5.97 (s, 1H, CH), 4.09 (q, *J* = 7.2 Hz, 2H, OCH<sub>2</sub>CH<sub>3</sub>), 4.03 (t, *J* = 7.6 Hz, 2H, NCH<sub>2</sub>), 2.51 (s, 3H, SCH<sub>3</sub>), 2.36 (t, *J* = 7.4 Hz, 2H, CH<sub>2</sub>CO), 2.16 (s, 3H, CH<sub>3</sub>), 2.00 (quintet, *J* = 7.4 Hz, 2H, CH<sub>2</sub>CH<sub>2</sub>CH<sub>2</sub>), 1.21 (t, *J* = 7.2 Hz, 3H, OCH<sub>2</sub>CH<sub>3</sub>); <sup>13</sup>C NMR (CDCl<sub>3</sub>): δ 172.6, 162.3 (2), 161.4, 107.7, 60.6, 43.3, 31.5, 23.6, 22.8, 15.0, 14.2; HRMS calcd for C<sub>12</sub>H<sub>18</sub>N<sub>2</sub>O<sub>3</sub>S: [M + H]<sup>+</sup> = 271.1111, found: 271.1117.

*Methyl 6*-[6-methyl-2-(methylthio)pyrimidin-4-yloxy]hexanoate (**21a**). Reaction time 2.75 h; isolated from a mixture of compounds **21a** and **21b**; R<sub>f</sub> 0.7 (chloroform – ethyl acetate 4:1); white solid; yield 0.054 g (19%); mp 50 °C; <sup>1</sup>H NMR (CDCl<sub>3</sub>): δ 6.19 (s, 1H, CH), 4.33 (t, *J* = 6.6 Hz, 2H, OCH<sub>2</sub>CH<sub>2</sub>), 3.66 (s, 3H, OCH<sub>3</sub>), 2.52 (s, 3H, SCH<sub>3</sub>), 2.38–2.28 (m, 5H, CH<sub>2</sub>CO, CH<sub>3</sub>), 1.80–1.63 (m, 4H, 2CH<sub>2</sub>), 1.50–1.40 (m, 2H, CH<sub>2</sub>); <sup>13</sup>C NMR (CDCl<sub>3</sub>): δ 174.1, 171.4, 169.4, 167.7, 102.1, 66.2, 51.6, 34.1, 28.6, 25.7, 24.8, 23.8, 14.1; HRMS calcd for C<sub>13</sub>H<sub>20</sub>N<sub>2</sub>O<sub>3</sub>S: [M + H]<sup>+</sup> = 285.1267, found: 285.1268.

*Methyl 6*-[6-methyl-2-(methylthio)-4-oxypyrimidin-3(4*H*)-yl]hexanoate (**21b**). Reaction time 2.75 h; isolated from a mixture of compounds **21a** and **21b**; R<sub>f</sub> 0.31 (chloroform – ethyl acetate 4:1); white solid; yield 0.026 g (9%); mp 52–54 °C; <sup>1</sup>H NMR (CDCl<sub>3</sub>): δ 6.01 (s, 1H, CH), 3.98 (t, *J* = 8 Hz, 2H, NCH<sub>2</sub>), 3.66 (s, 3H, OCH<sub>3</sub>), 2.54 (s, 3H, SCH<sub>3</sub>), 2.32 (t, *J* = 7.6 Hz, 2H, CH<sub>2</sub>CO), 2.20 (s, 3H, CH<sub>3</sub>), 1.78–1.63 (m, 4H, 2CH<sub>2</sub>), 1.45–1.35 (m, 2H, CH<sub>2</sub>); <sup>13</sup>C NMR (CDCl<sub>3</sub>): δ 174.1, 162.4, 162.3, 161.3, 107.9, 51.6, 44.0, 34.0, 27.2, 26.5, 24.6, 23.8, 15.1; HRMS calcd for C<sub>13</sub>H<sub>20</sub>N<sub>2</sub>O<sub>3</sub>S: [M + H]<sup>+</sup> = 285.1267, found: 285.1274.

*Ethyl [6-methyl-2-(methylthio)-5-propylpyrimidin-4-yloxy]acetate (22a)*. Reaction time 0.5 h; isolated from a mixture of compounds **22a** and **22b**;  $R_f$  0.53 (cyclohexane – ethyl acetate 4:1); white solid; yield 0.1 g (35%); mp 52–54 °C;  $^1\text{H NMR}$  ( $\text{CDCl}_3$ ):  $\delta$  4.88 (s, 2H,  $\text{OCH}_2$ ), 4.21 (q,  $J = 7.2$  Hz, 2H,  $\text{OCH}_2\text{CH}_3$ ), 2.54 (t,  $J = 7.6$  Hz, 2H,  $\text{CH}_2$ ), 2.45 (s, 3H,  $\text{SCH}_3$ ), 2.39 (s, 3H,  $\text{CH}_3$ ), 1.55 (sextet,  $J = 7.6$  Hz, 2H,  $\text{CH}_2$ ), 1.25 (t,  $J = 7.2$  Hz, 3H,  $\text{OCH}_2\text{CH}_3$ ), 0.96 (t,  $J = 7.6$  Hz, 3H,  $\text{CH}_3$ );  $^{13}\text{C NMR}$  ( $\text{CDCl}_3$ ):  $\delta$  168.7, 167.2, 166.2, 165.9, 114.8, 62.9, 61.3, 26.9, 22.0, 21.4, 14.3, 14.2, 14.0; HRMS calcd for  $\text{C}_{13}\text{H}_{20}\text{N}_2\text{O}_3\text{S}$ :  $[\text{M} + \text{H}]^+ = 285.1267$ , found: 285.1270.

*Ethyl [6-methyl-2-(methylthio)-4-oxo-5-propylpyrimidin-3(4H)-yl]acetate (22b)*. Reaction time 0.5 h; isolated from a mixture of compounds **22a** and **22b**;  $R_f$  0.39 (cyclohexane – ethyl acetate 4:1); white solid; yield 0.029 g (10%); mp 87–88 °C;  $^1\text{H NMR}$  ( $\text{CDCl}_3$ ):  $\delta$  4.77 (s, 2H,  $\text{NCH}_2$ ), 4.23 (q,  $J = 7.2$  Hz, 2H,  $\text{OCH}_2\text{CH}_3$ ), 2.55 (s, 3H,  $\text{SCH}_3$ ), 2.45 (t,  $J = 7.6$  Hz, 2H,  $\text{CH}_2$ ), 2.27 (s, 3H,  $\text{CH}_3$ ), 1.49 (sextet,  $J = 7.6$  Hz, 2H,  $\text{CH}_2$ ), 1.27 (t,  $J = 7.2$  Hz, 3H,  $\text{OCH}_2\text{CH}_3$ ), 0.94 (t,  $J = 7.6$  Hz, 3H,  $\text{CH}_3$ );  $^{13}\text{C NMR}$  ( $\text{CDCl}_3$ ):  $\delta$  167.0, 162.3, 158.3, 157.3, 119.6, 62.0, 45.2, 28.2, 21.7, 21.6, 14.9, 14.3, 14.2; HRMS calcd for  $\text{C}_{13}\text{H}_{20}\text{N}_2\text{O}_3\text{S}$ :  $[\text{M} + \text{H}]^+ = 285.1267$ , found: 285.1267.

*Ethyl 4-[6-methyl-2-(methylthio)-5-propylpyrimidin-4-yloxy]butanoate (23a)*. Reaction time 4 h; isolated from a mixture of compounds **23a** and **23b**;  $R_f$  0.69 (chloroform – ethyl acetate 30:1); colourless oil; yield 0.116 g (37%);  $^1\text{H NMR}$  ( $\text{CDCl}_3$ ):  $\delta$  4.37 (t,  $J = 6.4$  Hz, 2H,  $\text{OCH}_2$ ), 4.12 (q,  $J = 7.2$  Hz, 2H,  $\text{OCH}_2\text{CH}_3$ ), 2.49 (s, 3H,  $\text{SCH}_3$ ), 2.48–2.41 (m, 4H, 2 $\text{CH}_2$ ), 2.35 (s, 3H,  $\text{CH}_3$ ), 2.08 (quintet,  $J = 6.8$  Hz, 2H,  $\text{CH}_2\text{CH}_2\text{CH}_2$ ), 1.45 (sextet,  $J = 7.6$  Hz, 2H,  $\text{CH}_2$ ), 1.24 (t,  $J = 7.2$  Hz, 3H,  $\text{OCH}_2\text{CH}_3$ ), 0.92 (t,  $J = 7.4$  Hz, 3H,  $\text{CH}_3$ );  $^{13}\text{C NMR}$  ( $\text{CDCl}_3$ ):  $\delta$  173.1, 167.3, 167.0, 165.0, 114.7, 65.4, 60.6, 31.0, 26.8, 24.4, 22.1, 21.3, 14.3, 14.1 (2); HRMS calcd for  $\text{C}_{15}\text{H}_{24}\text{N}_2\text{O}_3\text{S}$ :  $[\text{M} + \text{H}]^+ = 313.1580$ , found: 313.1580.

*Ethyl 4-[6-methyl-2-(methylthio)-4-oxo-5-propylpyrimidin-3(4H)-yl]butanoate (23b)*. Reaction time 4 h; isolated from a mixture of compounds **23a** and **23b**;  $R_f$  0.5 (chloroform – ethyl acetate 30:1); white solid; yield 0.1 g (32%); mp 53–55 °C;  $^1\text{H NMR}$  ( $\text{CDCl}_3$ ):  $\delta$  4.13 (q,  $J = 7.2$  Hz, 2H,  $\text{OCH}_2\text{CH}_3$ ), 4.06 (t,  $J = 7.6$  Hz, 2H,  $\text{NCH}_2$ ), 2.53 (s, 3H,  $\text{SCH}_3$ ), 2.46–2.35 (m, 4H, 2 $\text{CH}_2$ ), 2.24 (s, 3H,  $\text{CH}_3$ ), 2.04 (quintet,  $J = 7.6$  Hz, 2H,  $\text{CH}_2\text{CH}_2\text{CH}_2$ ), 1.48 (sextet,  $J = 7.6$  Hz, 2H,  $\text{CH}_2$ ), 1.25 (t,  $J = 7.2$  Hz, 3H,  $\text{OCH}_2\text{CH}_3$ ), 0.95 (t,  $J = 7.4$  Hz, 3H,  $\text{CH}_3$ );  $^{13}\text{C NMR}$  ( $\text{CDCl}_3$ ):  $\delta$  172.8, 162.6, 157.8, 157.4, 119.7, 60.7, 43.9, 31.8, 28.3, 23.1, 21.7, 21.5, 14.8, 14.4, 14.3; HRMS calcd for  $\text{C}_{15}\text{H}_{24}\text{N}_2\text{O}_3\text{S}$ :  $[\text{M} + \text{H}]^+ = 313.1580$ , found: 313.1580.

*Methyl 6-[6-methyl-2-(methylthio)-5-propylpyrimidin-4-yloxy]hexanoate (24a)*. Reaction time 5 h; isolated from a mixture of compounds **24a** and **24b**;  $R_f$  0.47 (chloroform – ethyl acetate 30:1); colourless oil; yield 0.099 g (30%);  $^1\text{H NMR}$  ( $\text{CDCl}_3$ ):  $\delta$  4.37 (t,  $J = 6.4$  Hz, 2H,  $\text{OCH}_2$ ), 3.66 (s, 3H,  $\text{OCH}_3$ ), 2.51 (s, 3H,  $\text{SCH}_3$ ), 2.46 (t,  $J = 7.8$  Hz, 3H,  $\text{CH}_2\text{CO}$ ), 2.36 (s, 3H,  $\text{CH}_3$ ), 2.34 (t,  $J = 7.6$  Hz, 2H,  $\text{CH}_2$ ), 1.82–1.65 (m, 4H, 2 $\text{CH}_2$ ), 1.53–1.41 (m, 4H, 2 $\text{CH}_2$ ), 0.93 (t,  $J = 7.4$  Hz, 3H,  $\text{CH}_3$ );  $^{13}\text{C NMR}$  ( $\text{CDCl}_3$ ):  $\delta$  174.1, 167.3, 167.2, 164.8, 114.8, 66.2, 51.6, 34.1, 28.7, 26.9, 25.8, 24.8, 22.1, 21.3, 14.2, 14.1; HRMS calcd for  $\text{C}_{16}\text{H}_{26}\text{N}_2\text{O}_3\text{S}$ :  $[\text{M} + \text{H}]^+ = 327.1737$ , found: 327.1737.

*Methyl 6-[6-methyl-2-(methylthio)-4-oxo-5-propylpyrimidin-3(4H)-yl]hexanoate (24b)*. Reaction time 5 h; isolated from a mixture of compounds **24a** and **24b**;  $R_f$  0.3 (chloroform – ethyl acetate 30:1); white solid; yield 0.072 g (22%); mp 61–62 °C;  $^1\text{H}$  NMR ( $\text{CDCl}_3$ ):  $\delta$  3.98 (t,  $J = 7.8$  Hz, 2H,  $\text{NCH}_2$ ), 3.66 (s, 3H,  $\text{OCH}_3$ ), 2.52 (s, 3H,  $\text{SCH}_3$ ), 2.43 (t,  $J = 7.8$  Hz, 3H,  $\text{CH}_2\text{CO}$ ), 2.32 (t,  $J = 7.4$  Hz, 2H,  $\text{CH}_2$ ), 2.24 (s, 3H,  $\text{CH}_3$ ), 1.79–1.60 (m, 4H,  $2\text{CH}_2$ ), 1.55–1.35 (m, 4H,  $2\text{CH}_2$ ), 0.95 (t,  $J = 7.2$  Hz, 3H,  $\text{CH}_3$ );  $^{13}\text{C}$  NMR ( $\text{CDCl}_3$ ):  $\delta$  174.1, 162.6, 157.7, 157.3, 119.7, 51.6, 44.6, 34.0, 28.3, 27.3, 26.6, 24.6, 21.7, 21.5, 14.8, 14.3; HRMS calcd for  $\text{C}_{16}\text{H}_{26}\text{N}_2\text{O}_3\text{S}$ :  $[\text{M} + \text{H}]^+ = 327.1737$ , found: 327.1737.

*N-Hydroxy-4-[6-methyl-2-(methylthio)pyrimidin-4-yloxy]butanamide (25)*. White solid; yield 0.134 g (52%); mp 150–151 °C.  $^1\text{H}$  NMR ( $\text{DMSO}-d_6$ ):  $\delta$  10.46 and 9.84 (2s, 1H, NH), 9.12 and 8.72 (2s, 1H, OH), 6.46 (s, 1H, CH), 4.27 (t,  $J = 6.4$  Hz, 2H,  $\text{OCH}_2$ ), 2.47 (s, 3H,  $\text{SCH}_3$ ), 2.30 (s, 3H,  $\text{CH}_3$ ), 2.08 (t,  $J = 7.4$  Hz, 2H,  $\text{CH}_2\text{CO}$ ), 1.91 (quintet,  $J = 6.8$  Hz, 2H,  $\text{CH}_2\text{CH}_2\text{CH}_2$ );  $^{13}\text{C}$  NMR ( $\text{DMSO}-d_6$ ):  $\delta$  170.3, 168.7, 168.4, 167.8, 101.8, 65.6, 28.7, 24.4, 23.3, 13.4; HRMS calcd for  $\text{C}_{10}\text{H}_{15}\text{N}_3\text{O}_3\text{S}$ :  $[\text{M} + \text{H}]^+ = 258.0907$ , found: 258.0906.

*N-Hydroxy-6-[6-methyl-2-(methylthio)pyrimidin-4-yloxy]hexanamide (26)*. White solid; yield 0.193 g (68%); mp 112–113 °C.  $^1\text{H}$  NMR ( $\text{DMSO}-d_6$ ):  $\delta$  10.35 and 9.75 (2s, 1H, NH), 9.01 and 8.68 (2s, 1H, OH), 6.45 (s, 1H, CH), 4.27 (t,  $J = 6.4$  Hz, 2H,  $\text{OCH}_2$ ), 2.47 (s, 3H,  $\text{SCH}_3$ ), 2.29 (s, 3H,  $\text{CH}_3$ ), 1.95 (t,  $J = 7.2$  Hz, 2H,  $\text{CH}_2\text{CO}$ ), 1.68 (quintet,  $J = 7$  Hz, 2H,  $\text{CH}_2$ ); 1.53 (quintet,  $J = 7.2$  Hz, 2H,  $\text{CH}_2$ ), 1.40–1.27 (m, 2H,  $\text{CH}_2$ );  $^{13}\text{C}$  NMR ( $\text{DMSO}-d_6$ ):  $\delta$  170.3, 169.0, 168.8, 167.8, 101.8, 66.0, 32.2, 27.9, 25.0, 24.8, 23.3, 13.4; HRMS calcd for  $\text{C}_{12}\text{H}_{19}\text{N}_3\text{O}_3\text{S}$ :  $[\text{M} + \text{H}]^+ = 286.1220$ , found: 286.1223.

*N-Hydroxy-[6-methyl-2-(methylthio)-5-propylpyrimidin-4-yloxy]acetamide (27)*. White solid; yield 0.230 g (85%); mp 144–146 °C.  $^1\text{H}$  NMR ( $\text{DMSO}-d_6$ ):  $\delta$  10.76 and 10.18 (2s, 1H, NH), 9.31 and 8.96 (2s, 1H, OH), 5.10 and 4.73 (2s, 2H,  $\text{OCH}_2$ ), 2.55–2.46 (m, 2H,  $\text{CH}_2$ , overlaps with the residual signal of  $\text{DMSO}-d_6$ ), 2.44 (s, 3H,  $\text{SCH}_3$ ), 2.34 (s, 3H,  $\text{CH}_3$ ), 1.48 (sextet,  $J = 7.4$  Hz, 2H,  $\text{CH}_2$ ), 0.90 (t,  $J = 7.4$  Hz, 3H,  $\text{CH}_3$ );  $^{13}\text{C}$  NMR ( $\text{DMSO}-d_6$ ):  $\delta$  166.3, 166.0, 165.3, 164.3, 114.2, 62.9, 26.1, 21.4, 21.0, 13.9, 13.4; HRMS calcd for  $\text{C}_{11}\text{H}_{17}\text{N}_3\text{O}_3\text{S}$ :  $[\text{M} + \text{H}]^+ = 272.1063$ , found: 272.1069.

*N-Hydroxy-4-[6-methyl-2-(methylthio)-5-propylpyrimidin-4-yloxy]butanamide (28)*. White solid; yield 0.275 g (92%); mp 125–127 °C.  $^1\text{H}$  NMR ( $\text{DMSO}-d_6$ ):  $\delta$  10.42 and 9.84 (2s, 1H, NH), 9.04 and 8.70 (2s, 1H, OH), 4.29 (t,  $J = 6.2$  Hz, 2H,  $\text{OCH}_2$ ), 2.48–2.42 (m, 5H,  $\text{CH}_2$ ,  $\text{SCH}_3$ ), 2.33 (s, 3H,  $\text{CH}_3$ ), 2.10 (t,  $J = 7.2$  Hz, 2H,  $\text{CH}_2$ ), 1.92 (quintet,  $J = 6.8$  Hz, 2H,  $\text{CH}_2$ ), 1.45 (sextet,  $J = 7.4$  Hz, 2H,  $\text{CH}_2$ ), 0.89 (t,  $J = 7.4$  Hz, 3H,  $\text{CH}_3$ );  $^{13}\text{C}$  NMR ( $\text{DMSO}-d_6$ ):  $\delta$  168.5, 166.5, 166.4, 164.8, 114.2, 65.5, 28.7, 26.1, 24.5, 21.5, 21.0, 13.8, 13.4; HRMS calcd for  $\text{C}_{13}\text{H}_{21}\text{N}_3\text{O}_3\text{S}$ :  $[\text{M} + \text{H}]^+ = 300.1376$ , found: 300.1376.

*N-Hydroxy-6-[6-methyl-2-(methylthio)-5-propylpyrimidin-4-yloxy]hexanamide (29)*.  $R_f$  0.32 (chloroform – ethyl acetate – methanol 14:1:1); yellowish orange oil; yield 0.249 g (76%);  $^1\text{H}$  NMR ( $\text{DMSO}-d_6$ ):  $\delta$  10.34 and 9.74 (2 br. s, 1H, NH), 8.69 (very br. s, 1H, OH), 4.29 (t,  $J = 6.4$  Hz, 2H,  $\text{OCH}_2$ ), 2.48–2.41 (m, 5H,  $\text{CH}_2$ ,  $\text{SCH}_3$ ), 2.32 (s, 3H,  $\text{CH}_3$ ), 1.95 (t,  $J = 7.4$  Hz, 2H,  $\text{CH}_2$ ), 1.69 (quintet,  $J = 7.1$  Hz, 2H,  $\text{CH}_2$ ), 1.54 (quintet,  $J = 7.5$  Hz, 2H,  $\text{CH}_2$ ), 1.44 (sextet,  $J = 7.5$  Hz, 2H,  $\text{CH}_2$ ), 1.36 (quintet,  $J = 7.2$  Hz, 2H,  $\text{CH}_2$ ), 0.88 (t,  $J = 7.4$  Hz, 3H,  $\text{CH}_3$ );  $^{13}\text{C}$  NMR ( $\text{DMSO}-d_6$ ):  $\delta$  169.0, 166.6, 166.4, 164.7, 114.1, 66.0, 32.2, 28.0, 26.1, 25.1, 24.8, 21.5, 21.0, 13.8, 13.4; HRMS calcd for  $\text{C}_{15}\text{H}_{25}\text{N}_3\text{O}_3\text{S}$ :  $[\text{M} + \text{H}]^+ = 328.1689$ , found: 328.1689.

*N*-Hydroxy-[6-methyl-2-(methylthio)-4-oxo-5-propylpyrimidin-3(4*H*)-yl]acetamide (**30**). White solid; yield 0.141 g (58%); mp 185–187 °C (ethanol-water); <sup>1</sup>H NMR (DMSO-*d*<sub>6</sub>): δ 10.78 and 10.39 (2s, 1H, NH), 9.46 and 9.01 (2s, 1H, OH), 4.82 and 4.50 (2s, 2H, NCH<sub>2</sub>), 2.50 (s, 3H, SCH<sub>3</sub>, overlaps with the residual signal of DMSO-*d*<sub>6</sub>), 2.35 (t, *J* = 7.2 Hz, 2H, CH<sub>2</sub>), 2.24 (s, 3H, CH<sub>3</sub>), 1.40 (sextet, *J* = 7.2 Hz, 2H, CH<sub>2</sub>), 0.88 (t, *J* = 7.2 Hz, 3H, CH<sub>3</sub>); <sup>13</sup>C NMR (DMSO-*d*<sub>6</sub>): δ 162.7, 161.3, 158.0, 157.2, 118.2, 43.8, 27.5, 21.3, 21.1, 14.4, 13.9; HRMS calcd for C<sub>11</sub>H<sub>17</sub>N<sub>3</sub>O<sub>3</sub>S: [M + H]<sup>+</sup> = 272.1063, found: 272.1066.

*N*-Hydroxy-4-[6-methyl-2-(methylthio)-4-oxo-5-propylpyrimidin-3(4*H*)-yl]butanamide (**31**). Yield 0.188 g (63%); mp 133–135 °C. <sup>1</sup>H NMR (DMSO-*d*<sub>6</sub>): δ ): δ 10.41 and 9.83 (2s, 1H, NH), 9.04 and 8.72 (2s, 1H, OH), 3.93 (t, *J* = 7.6 Hz, 2H, NCH<sub>2</sub>), 2.51 (s, 3H, SCH<sub>3</sub>, overlaps with the residual signal of DMSO-*d*<sub>6</sub>), 2.35 (t, *J* = 7.6 Hz, 2H, CH<sub>2</sub>), 2.21 (s, 3H, CH<sub>3</sub>), 2.01 (t, *J* = 7.6 Hz, 2H, CH<sub>2</sub>), 1.81 (quintet, *J* = 7.6 Hz, 2H, CH<sub>2</sub>), 1.40 (sextet, *J* = 7.4 Hz, 2H, CH<sub>2</sub>), 0.88 (t, *J* = 7.4 Hz, 3H, CH<sub>3</sub>); <sup>13</sup>C NMR (DMSO-*d*<sub>6</sub>): δ 168.1, 161.3, 157.3, 157.0, 118.4, 43.6, 29.8, 27.5, 23.5, 21.2, 21.1, 14.2, 13.9; HRMS calcd for C<sub>13</sub>H<sub>21</sub>N<sub>3</sub>O<sub>3</sub>S: [M + H]<sup>+</sup> = 300.1376, found: 300.1375.

## HDAC enzyme activity assay

Recombinant HDAC4 and 8 were produced as described in [3]. Serial dilutions of the inhibitor in the assay buffer (25 mM Tris-HCl, pH 8.0, 75 mM KCl, 0.001% Pluronic F-127) were incubated with HDAC in a black 96-well microtiter half-area plate (Greiner) for 60 min at 30 °C. Subsequently the reaction was started by the addition of 20 μM Boc-Lys(trifluoroacetyl)-AMC (Bachem) as a substrate. After incubation for 60 min at 30 °C, the reaction was stopped by the addition of 1.7 μM SATFMK. The deacetylated substrate was transformed into a fluorescent product by the addition of 0.4 mg/mL trypsin (Applichem). The release of AMC was followed in a microplate reader (PheraStar Plus, BMG Labtech) at 450 nm (λ<sub>EX</sub> = 350 nm) and correlated to enzyme activity. Dose–response curves were produced with GraphPad Prism and fitted to a four parameters logistic function to obtain IC<sub>50</sub> values [4].

$$EA = E_0 + \frac{(E_{max} - E_0)}{1 + 10^{(\log(IC_{50}) - x) \cdot h}}$$

in which EA is the enzyme activity at a given inhibitor concentration *x*; E<sub>max</sub> and E<sub>0</sub> are the enzyme activities determined at zero and complete inhibition, respectively; IC<sub>50</sub> represents the inhibitor concentration at which half the enzyme molecules are inhibited; *h* is the slope of the curve.

## References

1. Gut, J.; Morávek, J.; Párkányi, C.; Prystaš, M.; Škoda, J.; Šorm, F. *Collect. Czech. Chem. Commun.* **1959**, *24*, 3154–3162. doi: [10.1135/cccc19593154](https://doi.org/10.1135/cccc19593154)
2. Bakavoli, M.; Eshghi, H.; Shiri, A.; Afrough, T.; Tajabadi, J. *Tetrahedron* **2013**, *69*, 8470–8476. doi: [10.1016/j.tet.2013.07.025](https://doi.org/10.1016/j.tet.2013.07.025)
3. Jänsch, N.; Meyners, C.; Muth, M.; Kopranovic, A.; Witt, O.; Oehme, I.; Meyer-Almes, F.-J. *Redox Biol.* **2019**, *20*, 60–67. doi: [10.1016/j.redox.2018.09.013](https://doi.org/10.1016/j.redox.2018.09.013)
4. Volund, A. *Biometrics.* **1978**, *34*, 357. doi: [10.2307/2530598](https://doi.org/10.2307/2530598)



## Copies of NMR spectra

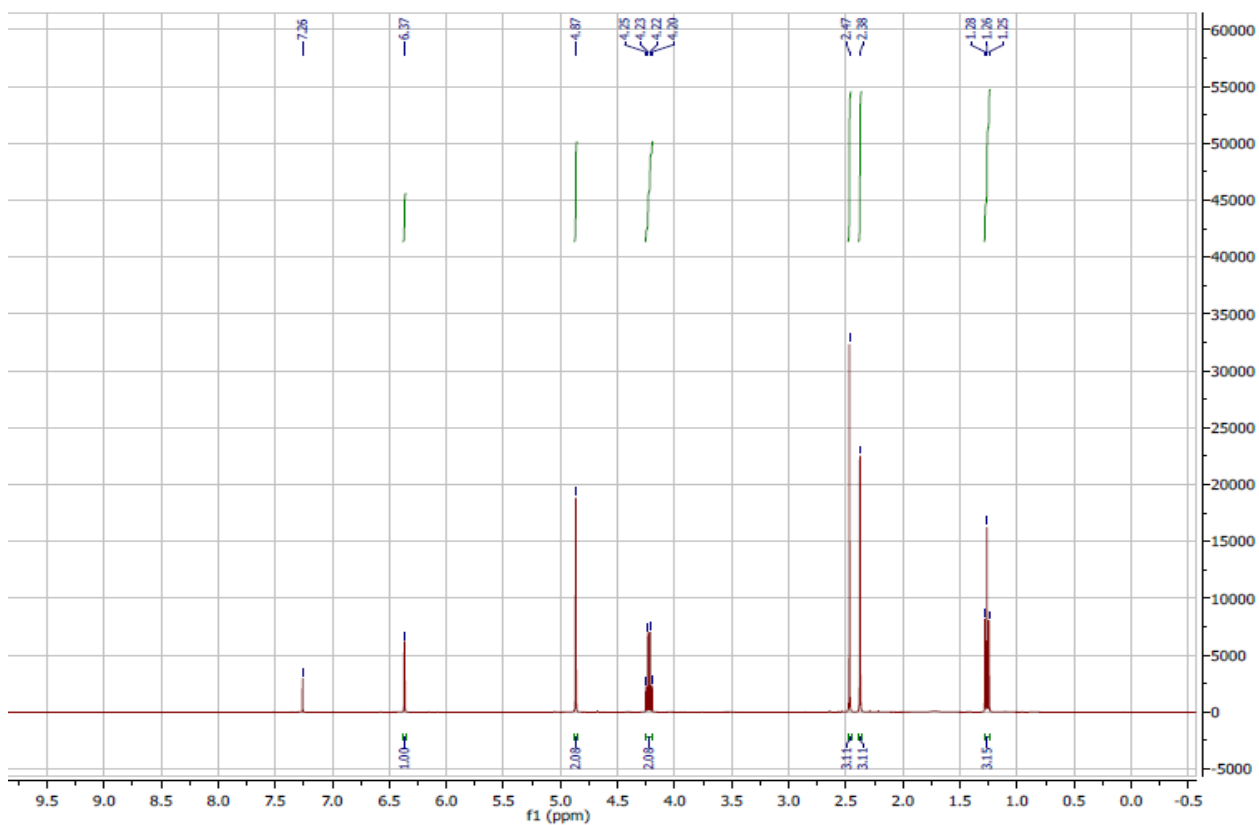

**Figure S1:** <sup>1</sup>H NMR spectrum of compound 3 (CDCl<sub>3</sub>).

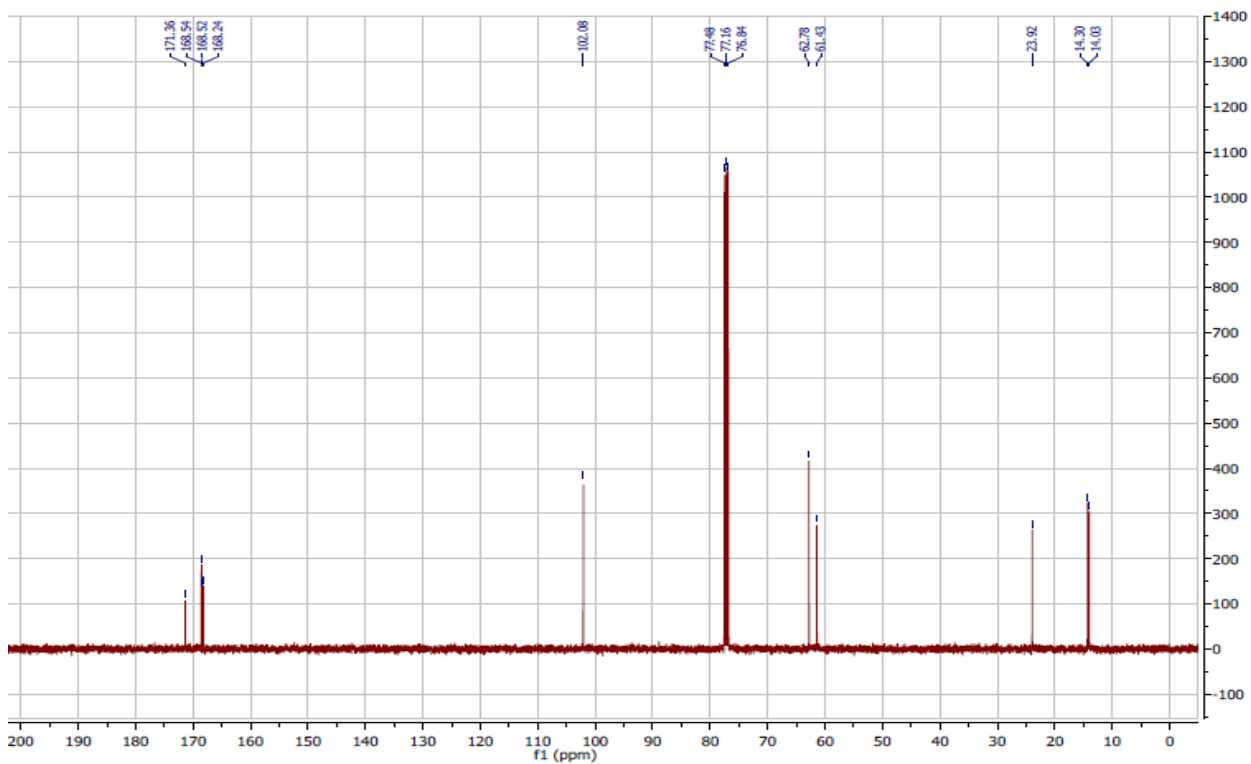

**Figure S2:** <sup>13</sup>C NMR spectrum of compound 3 (CDCl<sub>3</sub>).

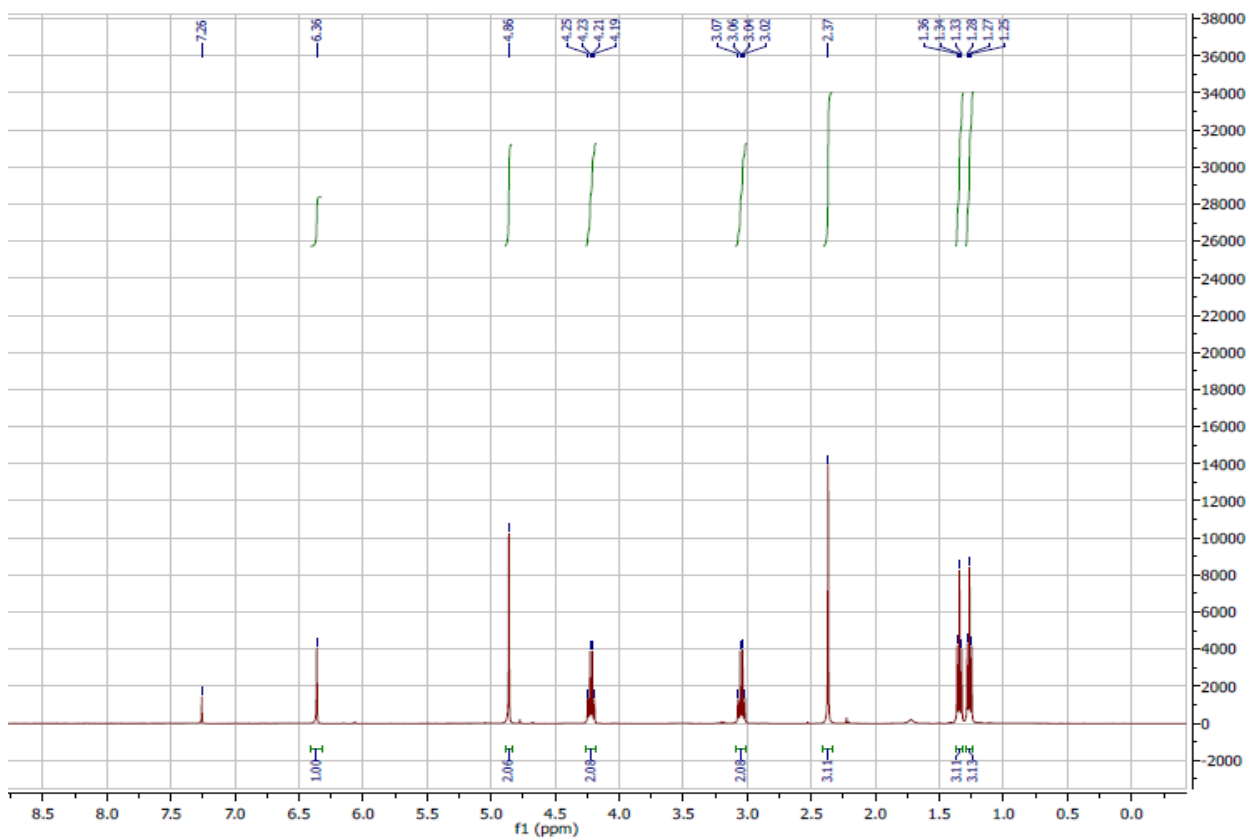

**Figure S3:**  $^1\text{H}$  NMR spectrum of compound **4** ( $\text{CDCl}_3$ ).

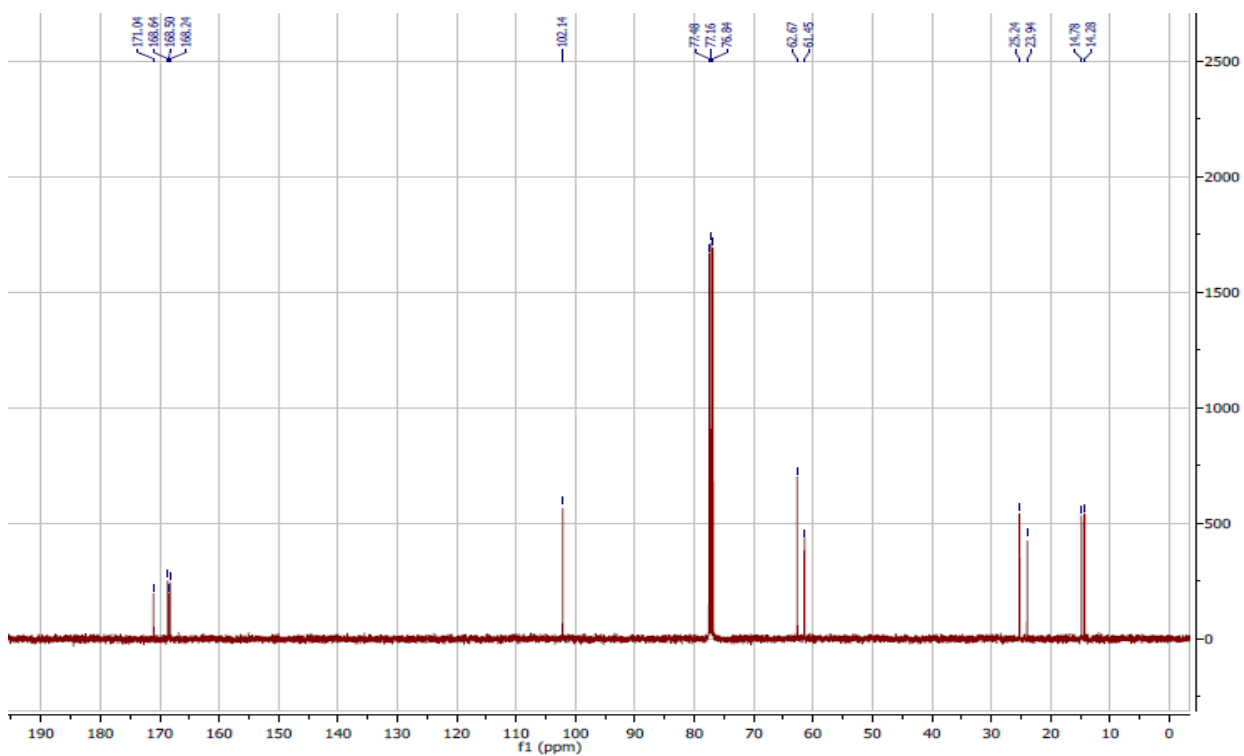

**Figure S4:**  $^{13}\text{C}$  NMR spectrum of compound **4** ( $\text{CDCl}_3$ ).

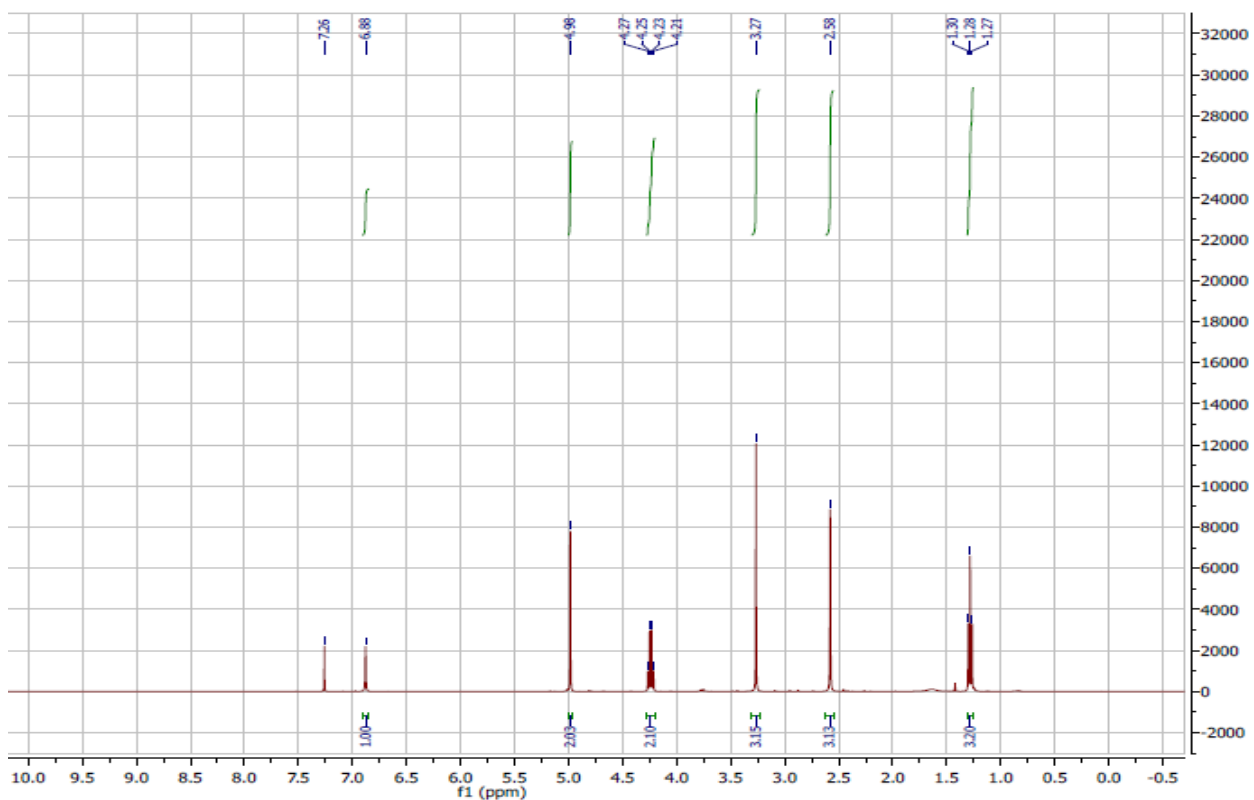

**Figure S5:**  $^1\text{H}$  NMR spectrum of compound **5** ( $\text{CDCl}_3$ ).

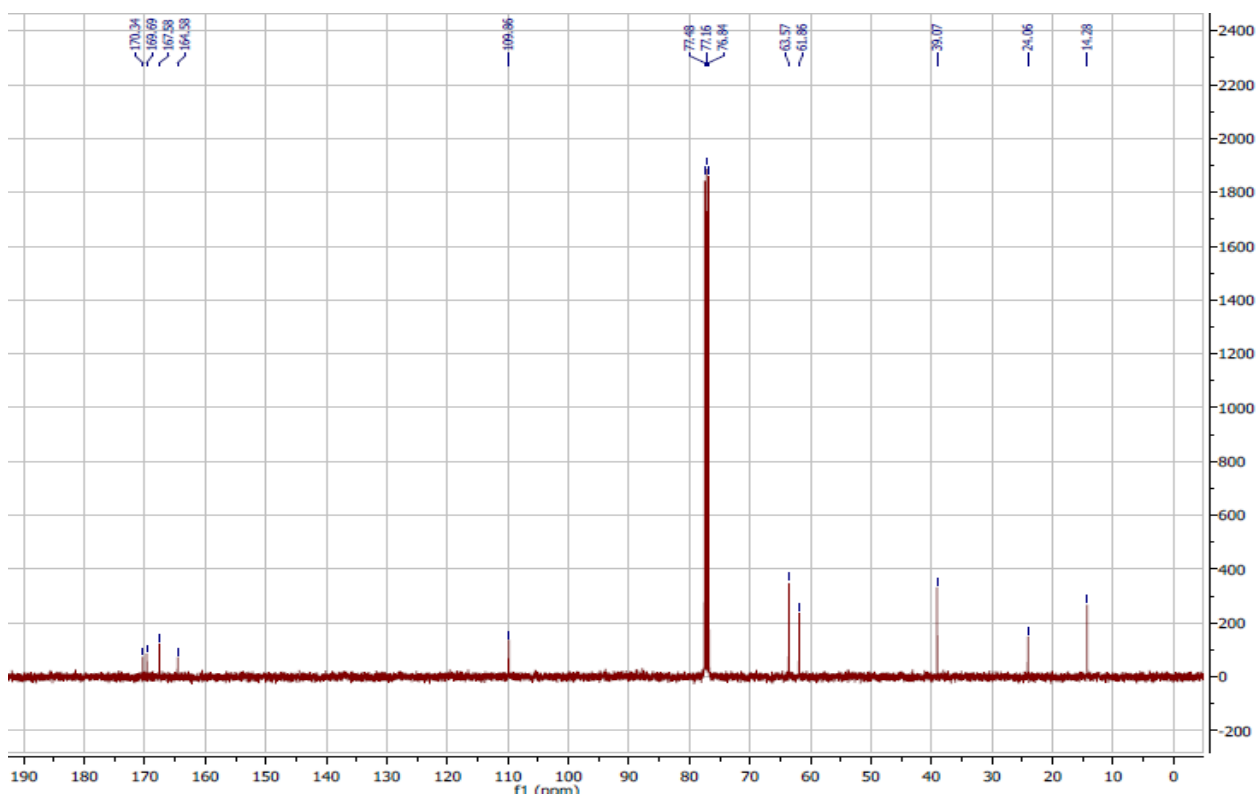

**Figure S6:**  $^{13}\text{C}$  NMR spectrum of compound **5** ( $\text{CDCl}_3$ ).

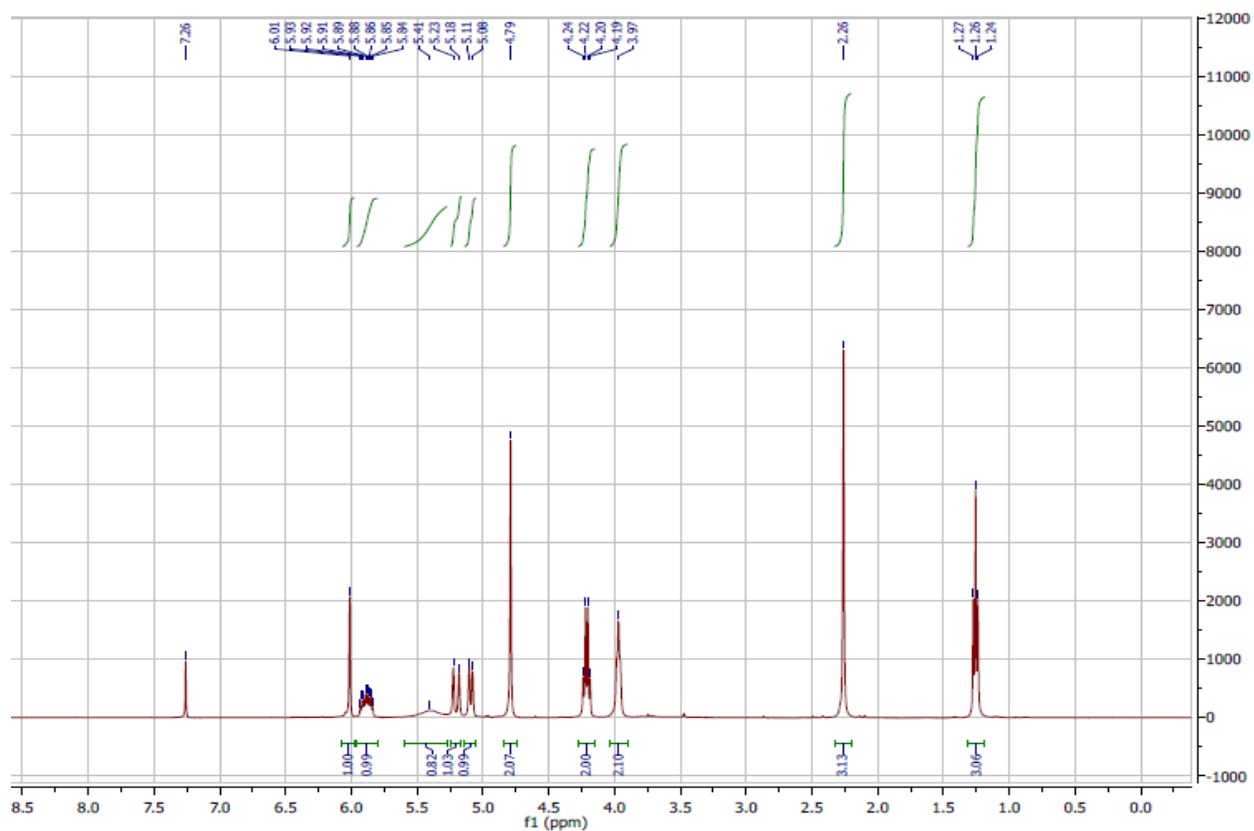

**Figure S7:**  $^1\text{H}$  NMR spectrum of compound **6** ( $\text{CDCl}_3$ ).

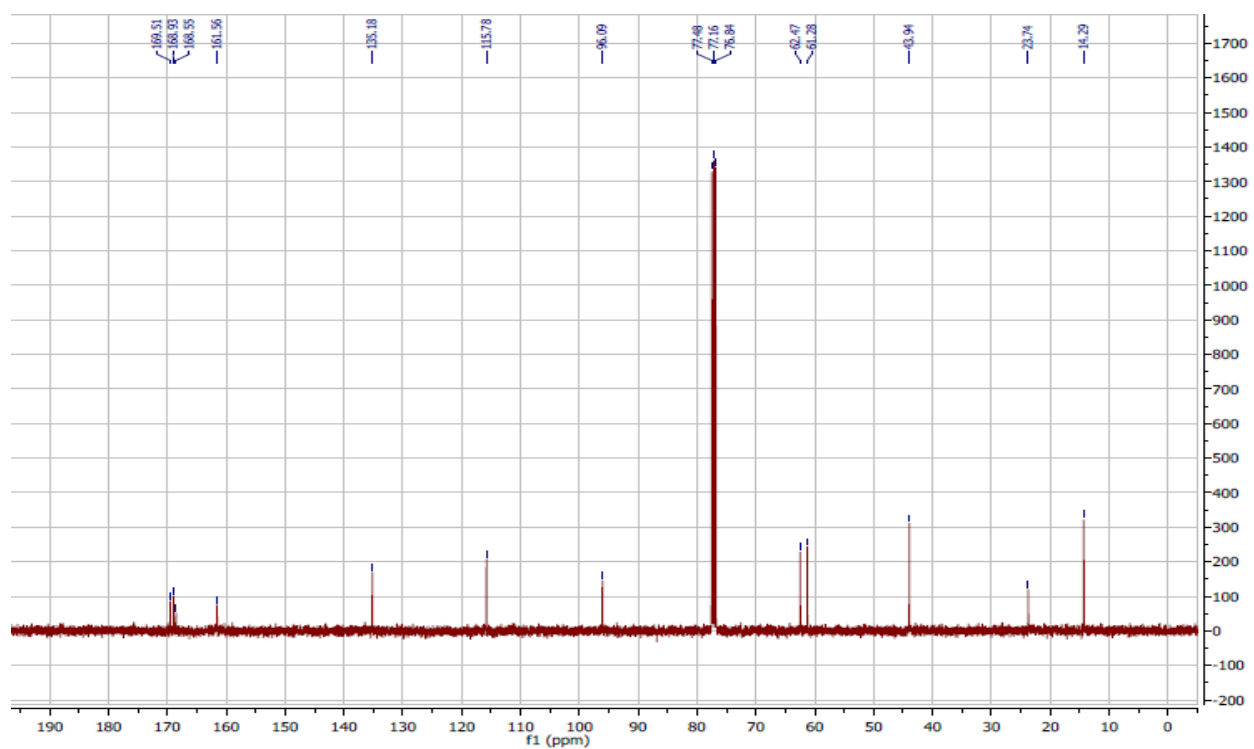

**Figure S8:**  $^{13}\text{C}$  NMR spectrum of compound **6** ( $\text{CDCl}_3$ ).

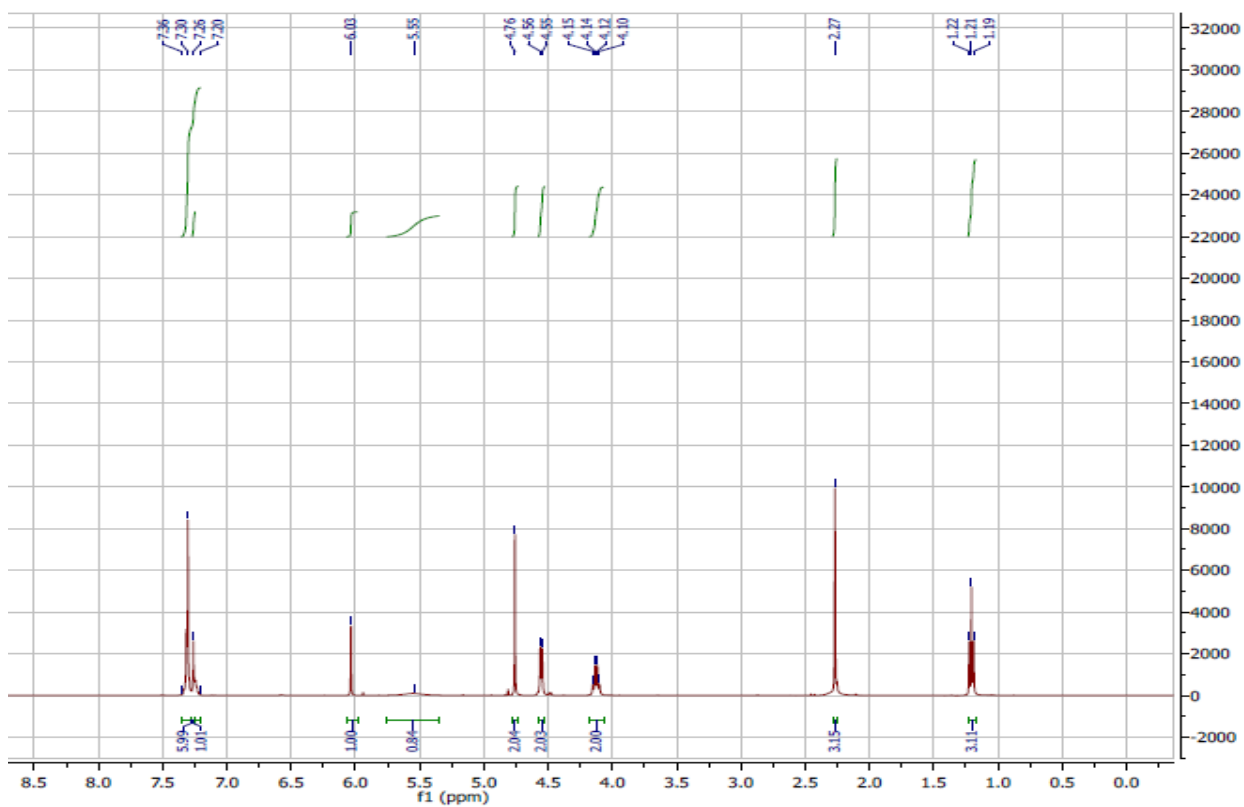

**Figure S9:**  $^1\text{H}$  NMR spectrum of compound **7** ( $\text{CDCl}_3$ ).

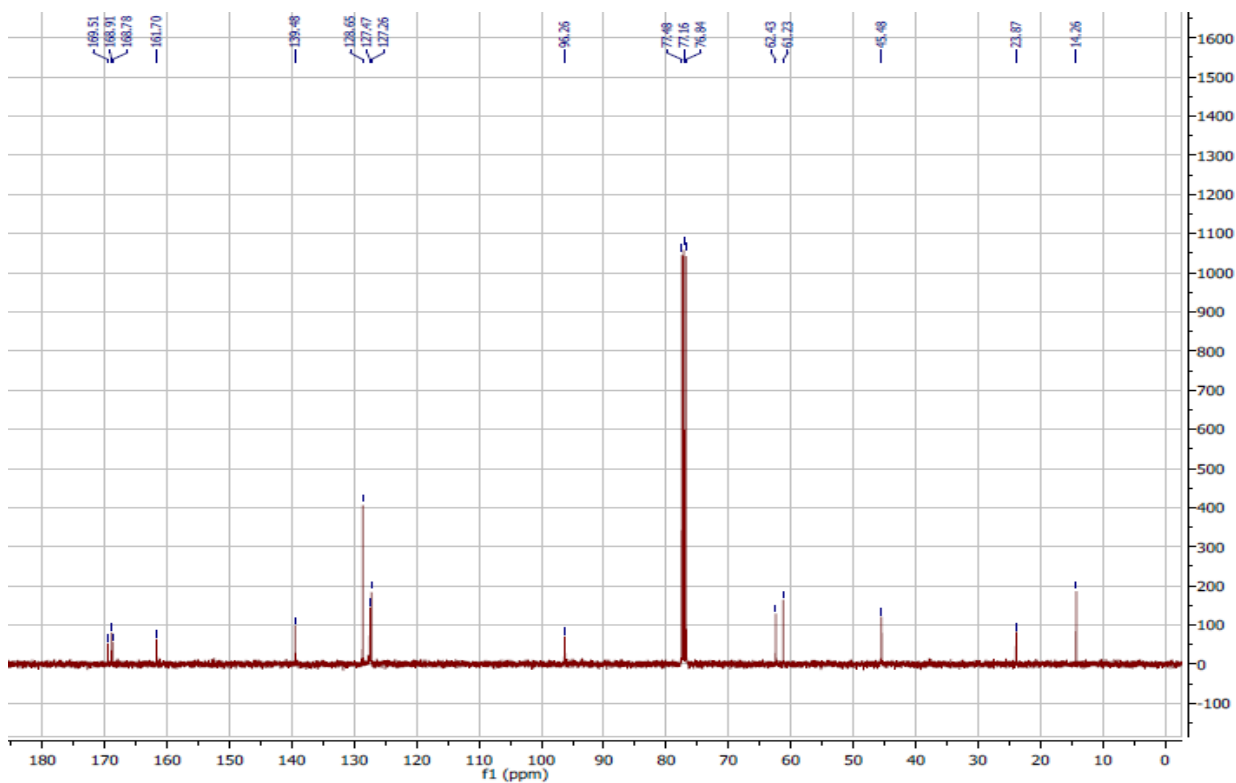

**Figure S10:**  $^{13}\text{C}$  NMR spectrum of compound **7** ( $\text{CDCl}_3$ ).

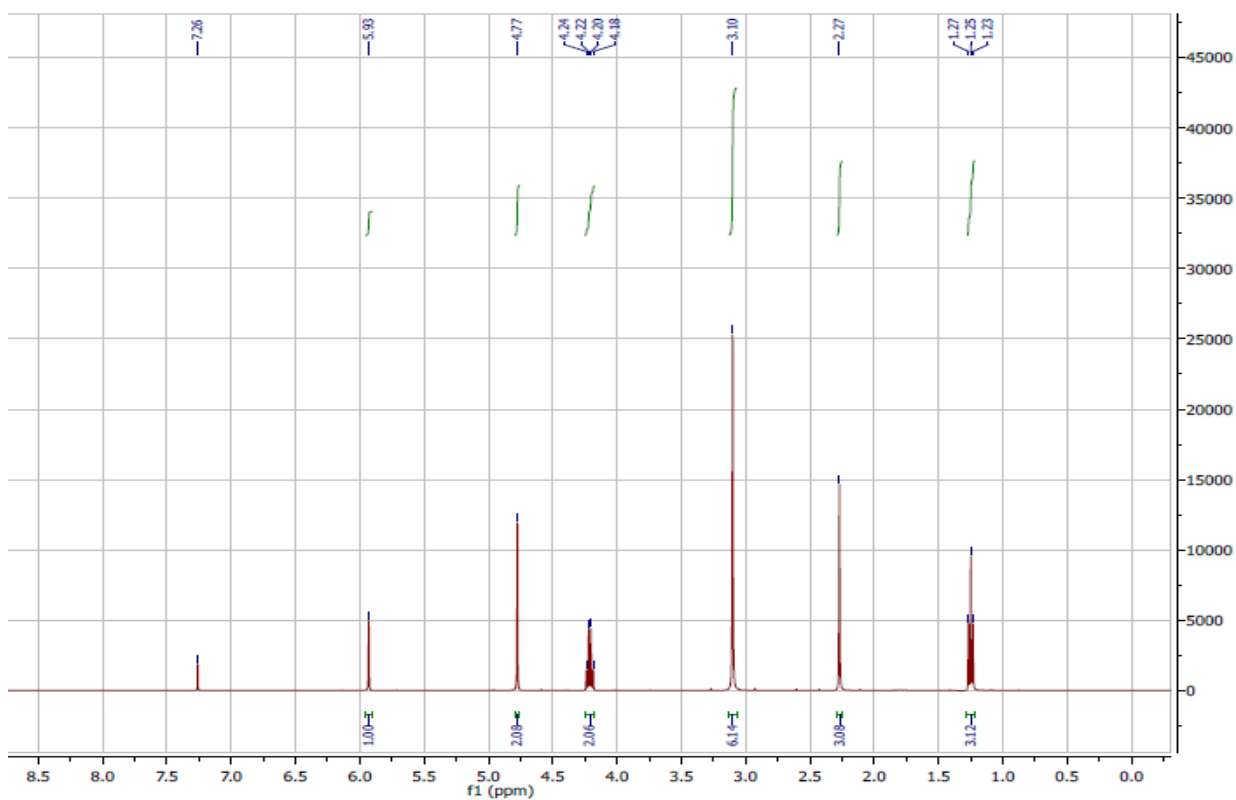

**Figure S11:**  $^1\text{H}$  NMR spectrum of compound **8** ( $\text{CDCl}_3$ ).

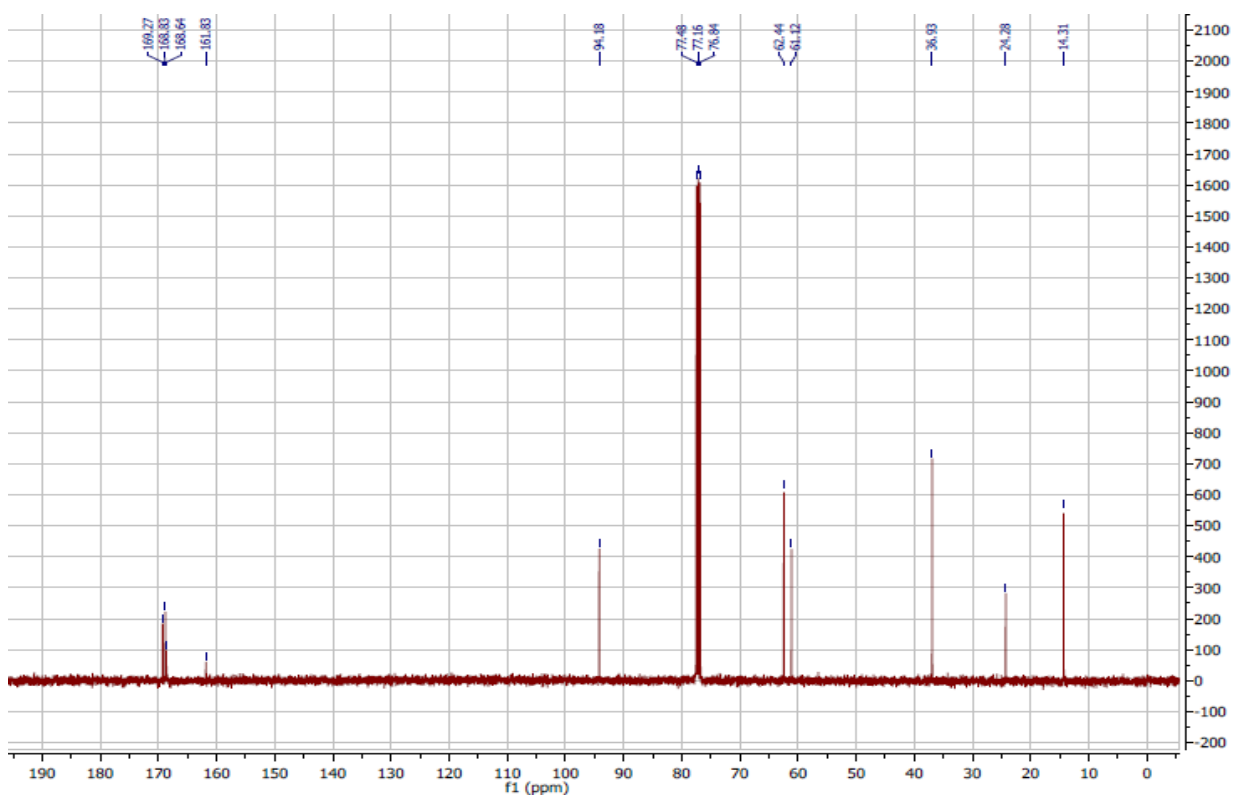

**Figure S12:**  $^{13}\text{C}$  NMR spectrum of compound **8** ( $\text{CDCl}_3$ ).

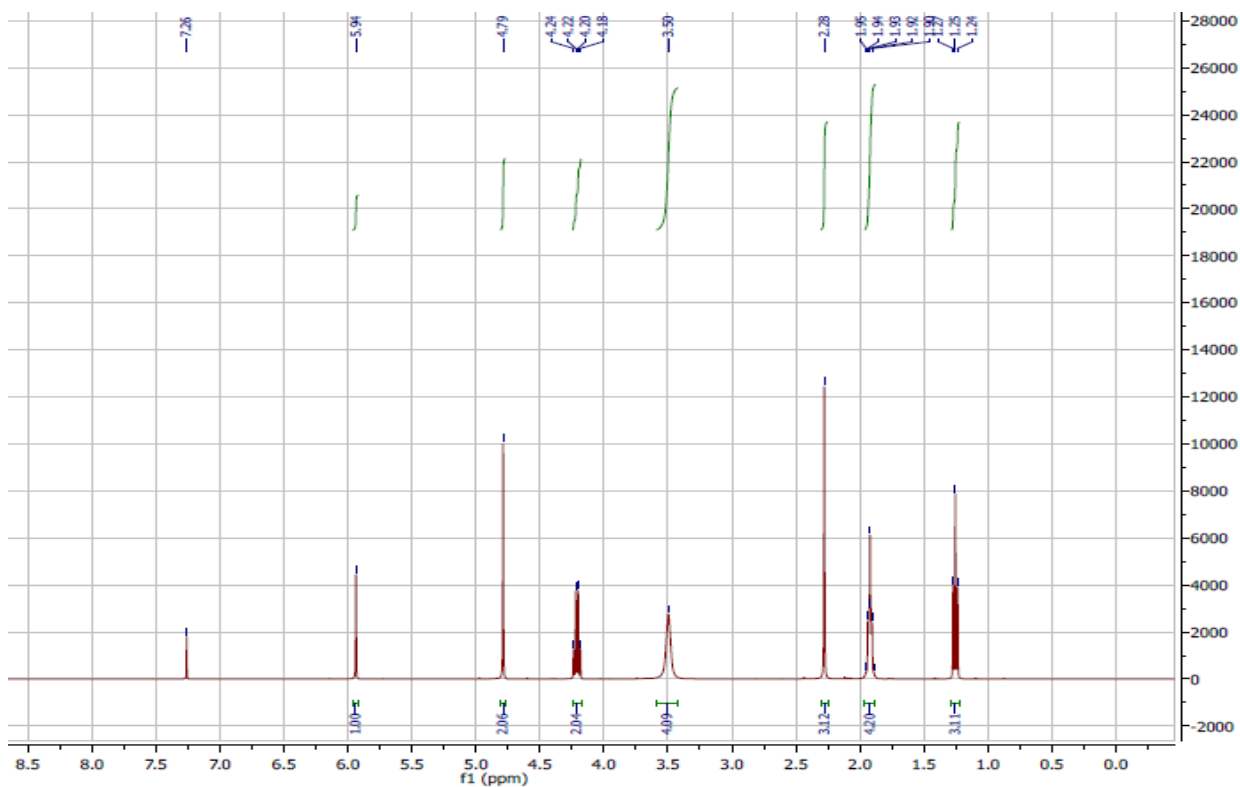

**Figure S13:**  $^1\text{H}$  NMR spectrum of compound **9** ( $\text{CDCl}_3$ ).

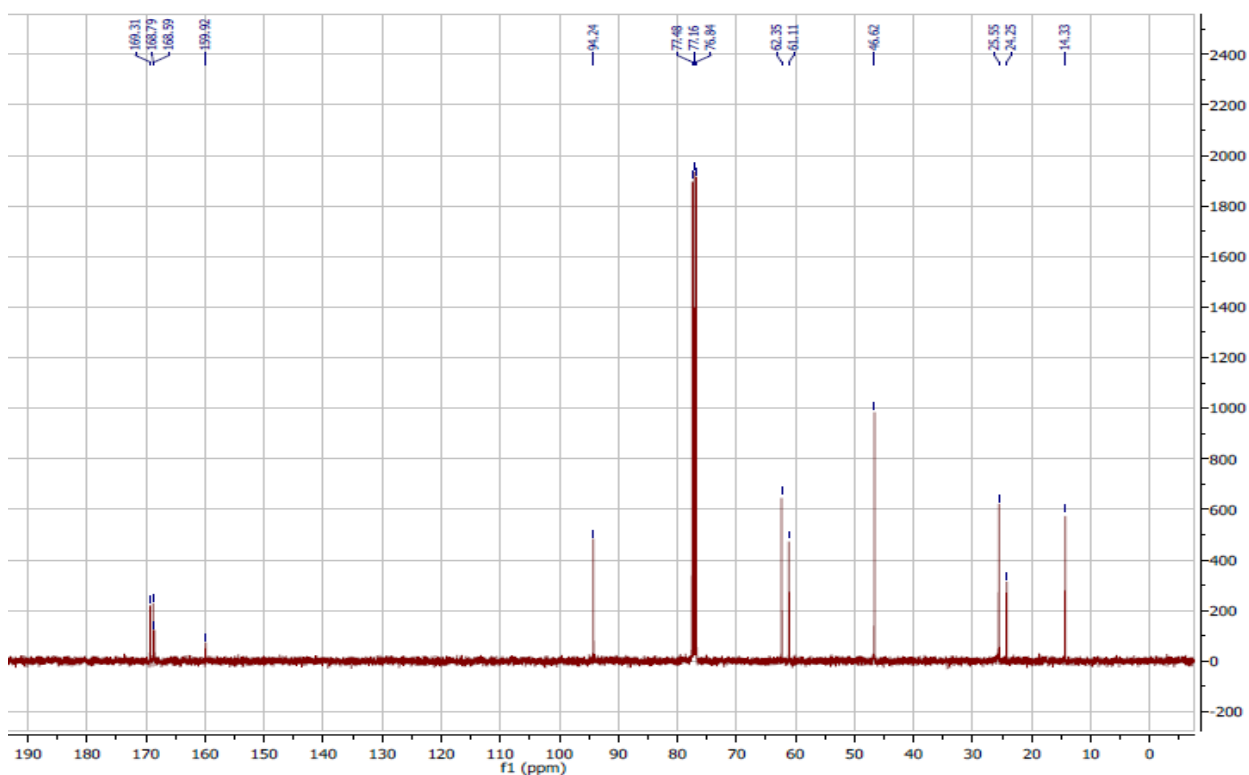

**Figure S14:**  $^{13}\text{C}$  NMR spectrum of compound **9** ( $\text{CDCl}_3$ ).

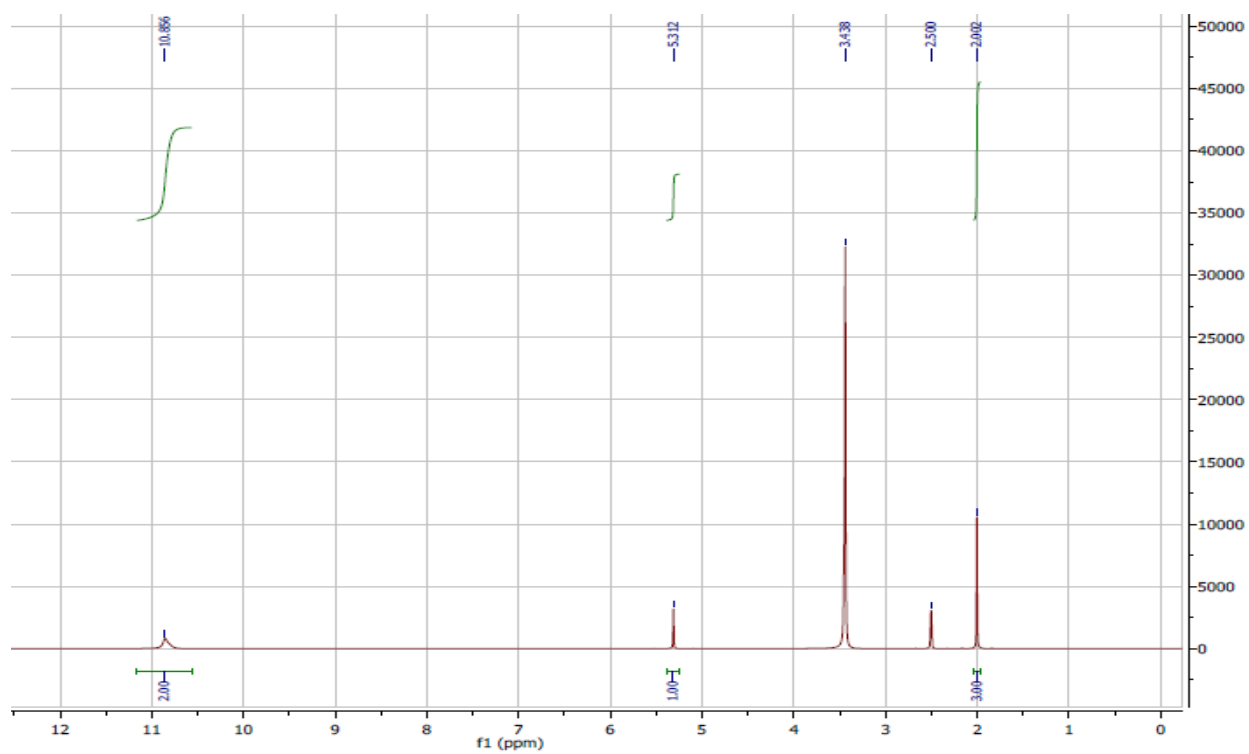

**Figure S15:**  $^1\text{H}$  NMR spectrum of compound **10** ( $\text{DMSO-}d_6$ ).

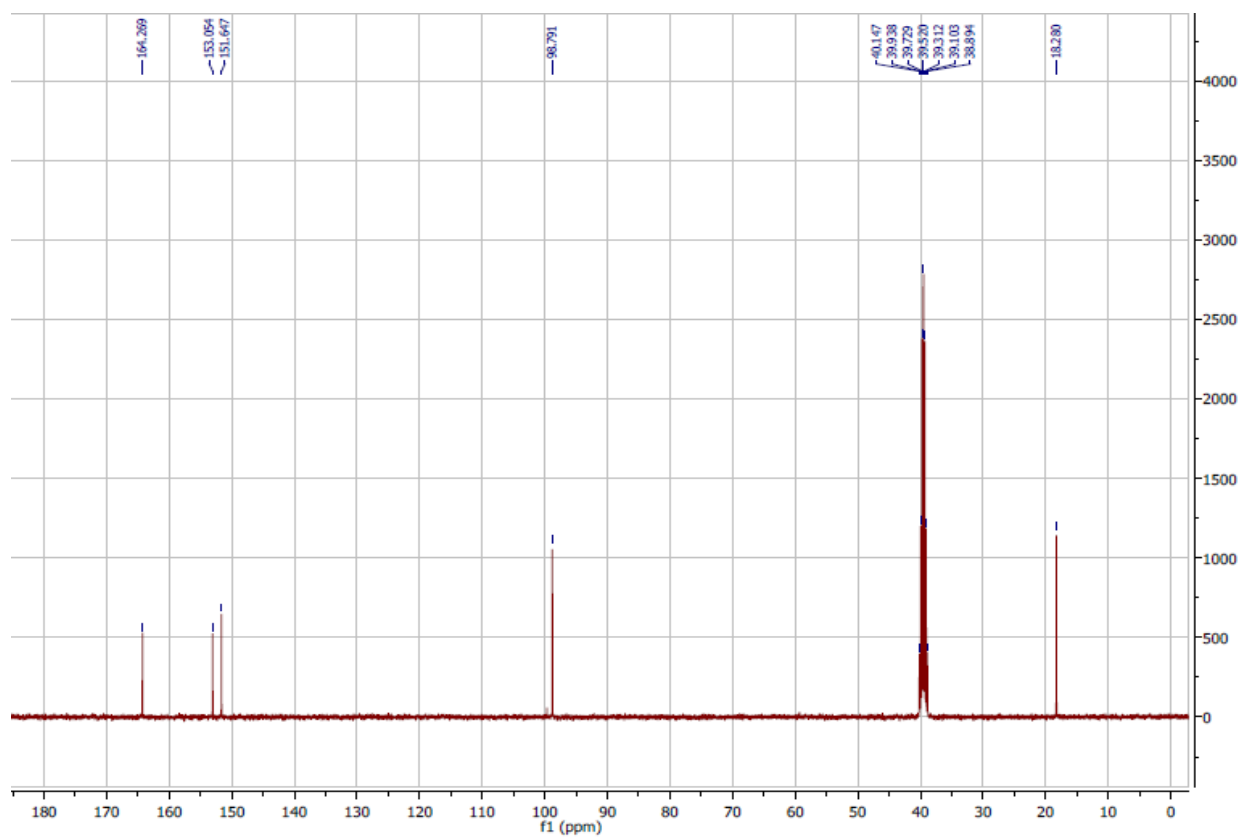

**Figure S16:**  $^{13}\text{C}$  NMR spectrum of compound **10** ( $\text{DMSO-}d_6$ ).



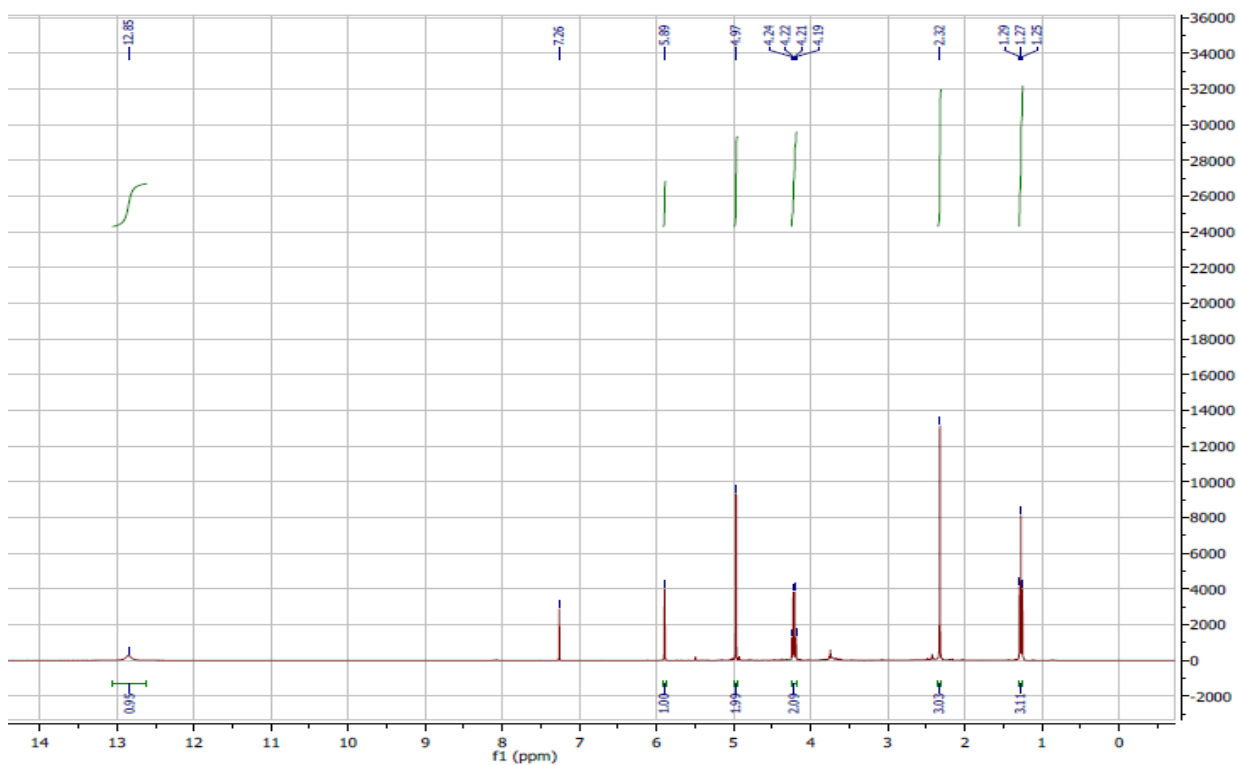

**Figure S17:**  $^1\text{H}$  NMR spectrum of compound **11** ( $\text{CDCl}_3$ ).

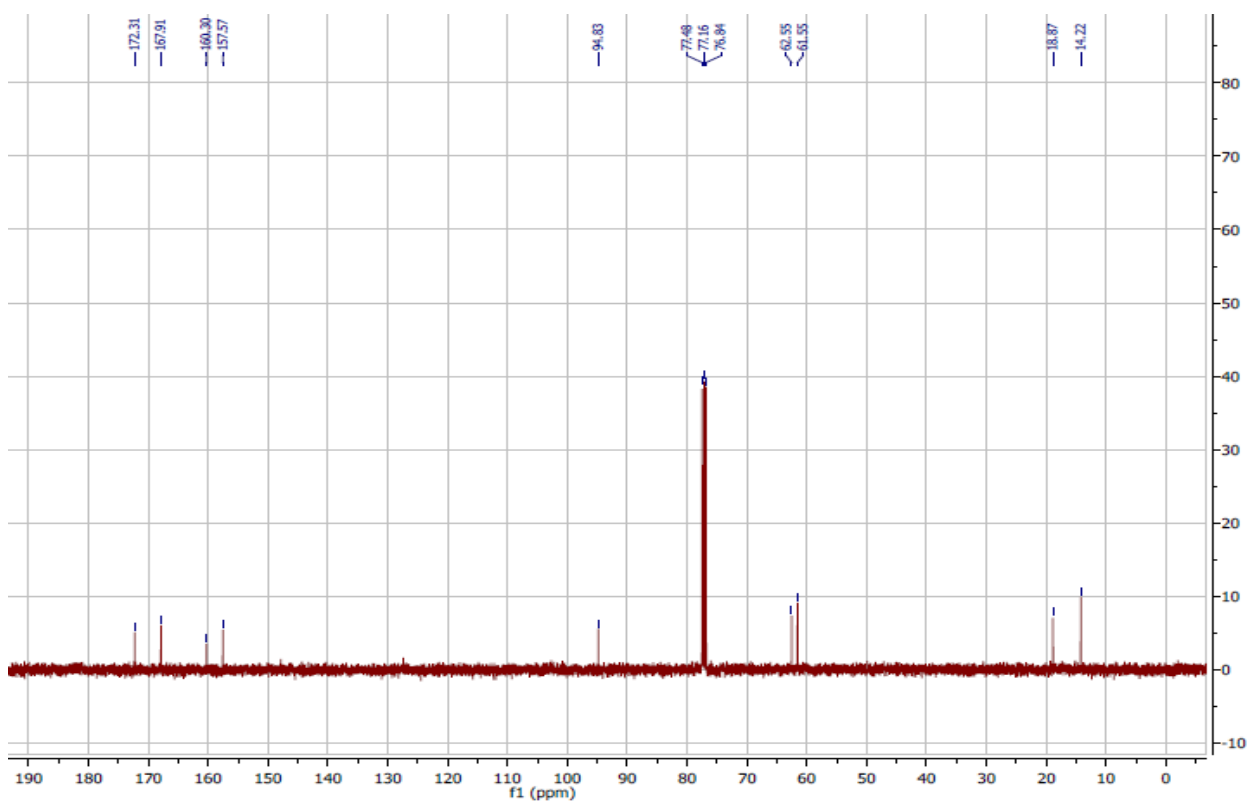

**Figure S18:**  $^{13}\text{C}$  NMR spectrum of compound **11** ( $\text{CDCl}_3$ ).

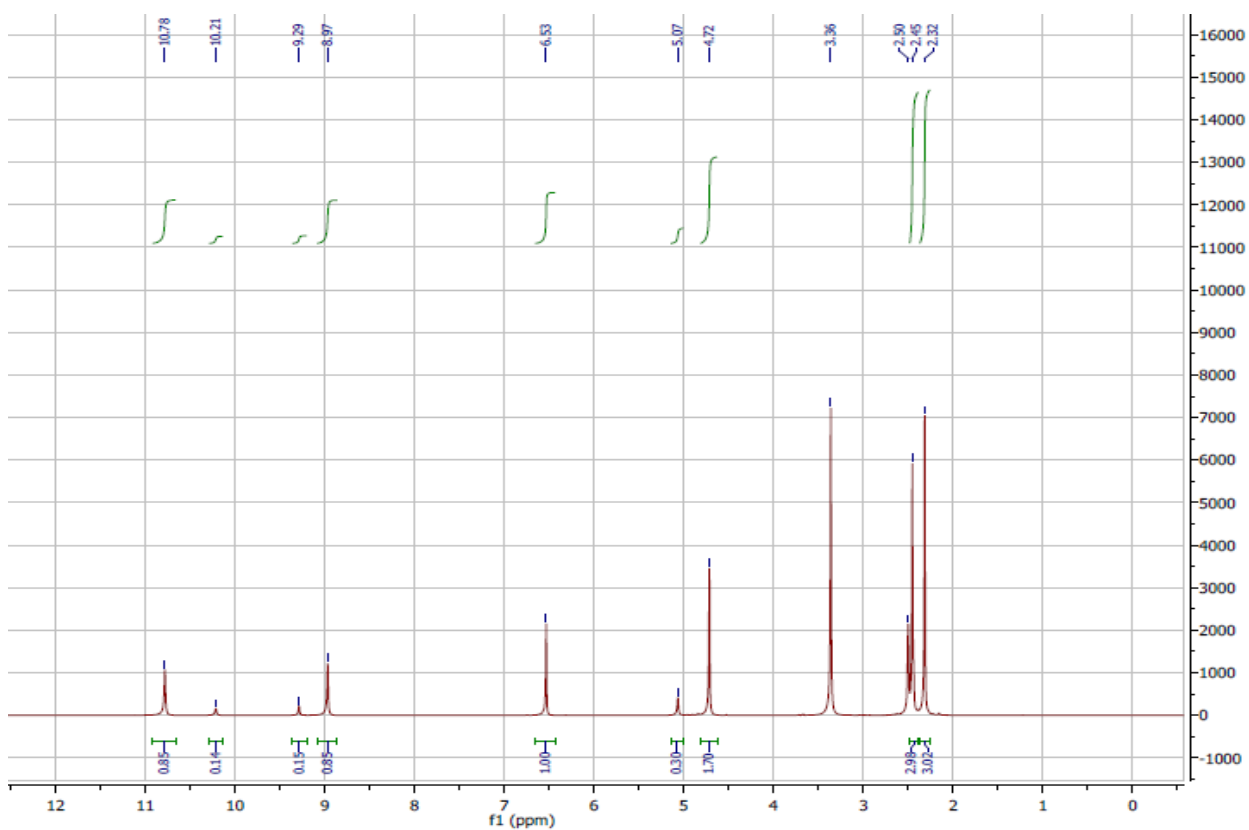

**Figure S19:**  $^1\text{H}$  NMR spectrum of compound **12** ( $\text{DMSO-}d_6$ ).

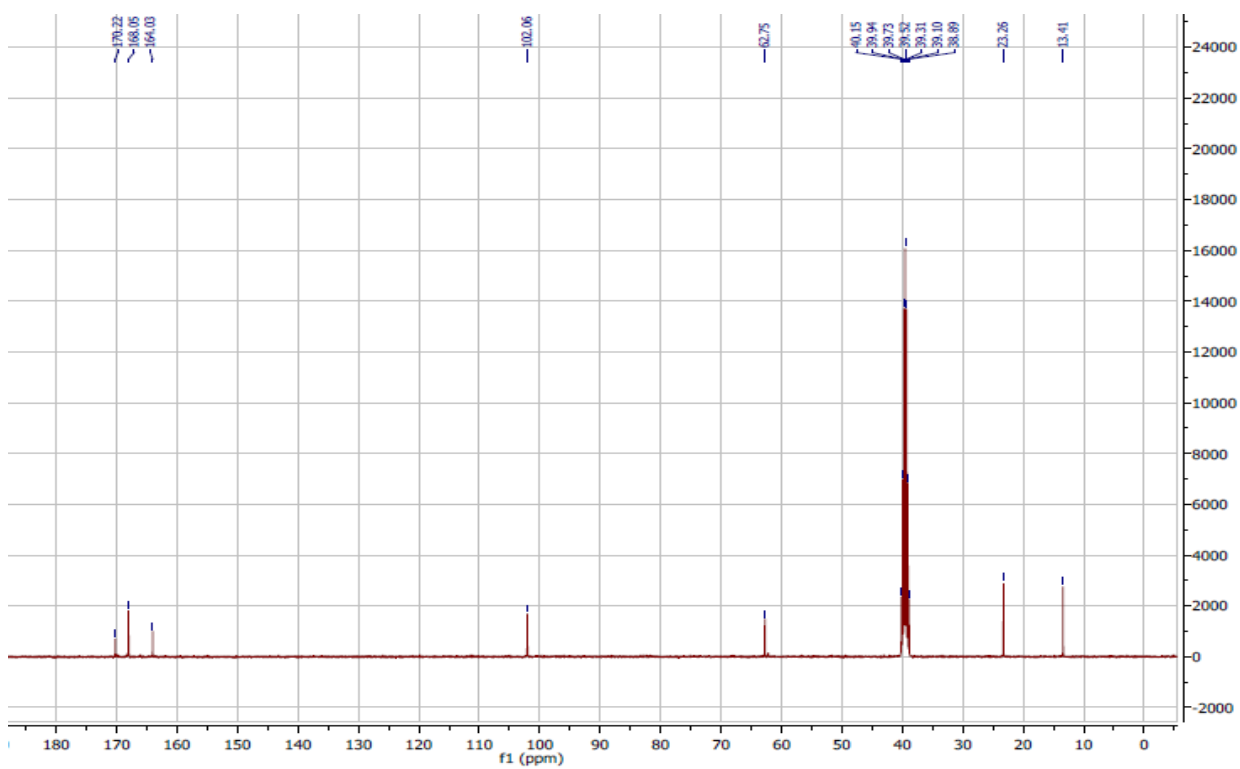

**Figure S20:**  $^{13}\text{C}$  NMR spectrum of compound **12** ( $\text{DMSO-}d_6$ ).

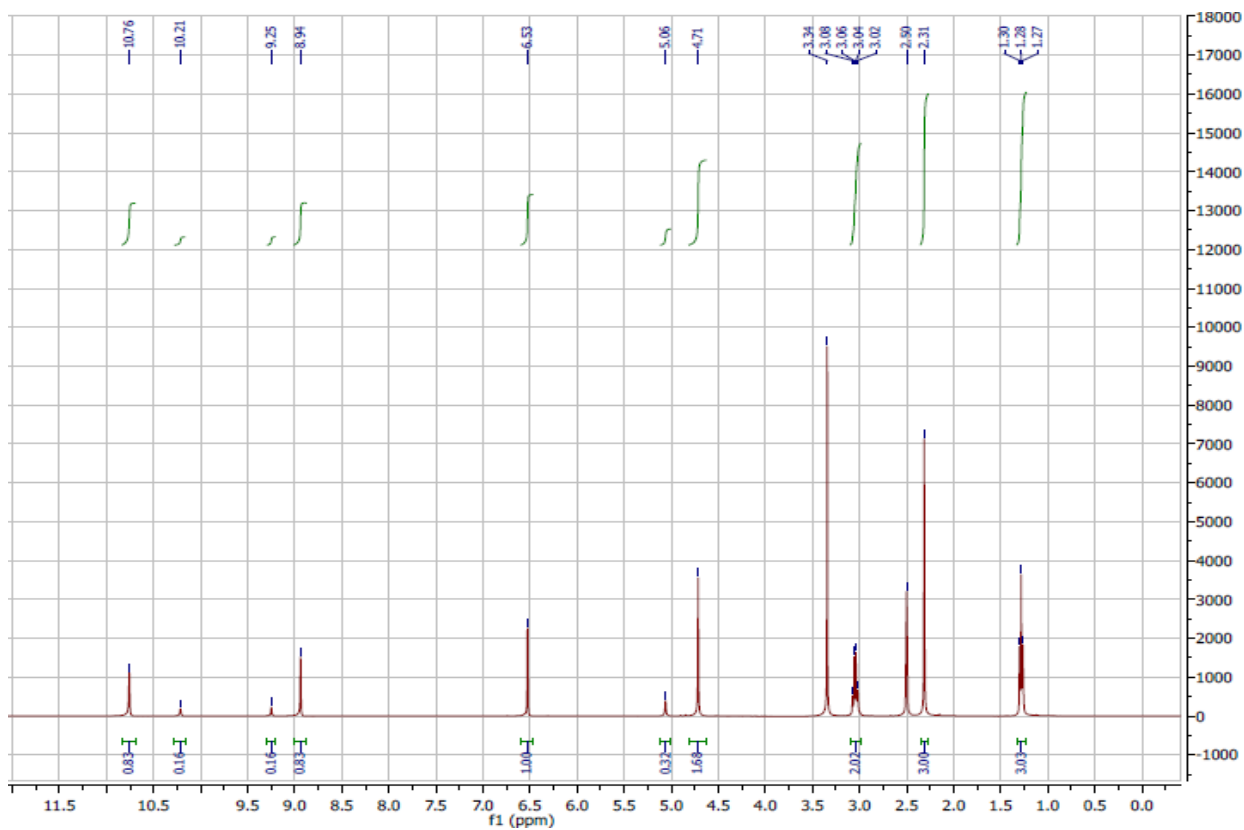

**Figure S21:**  $^1\text{H}$  NMR spectrum of compound **13** ( $\text{DMSO-}d_6$ ).

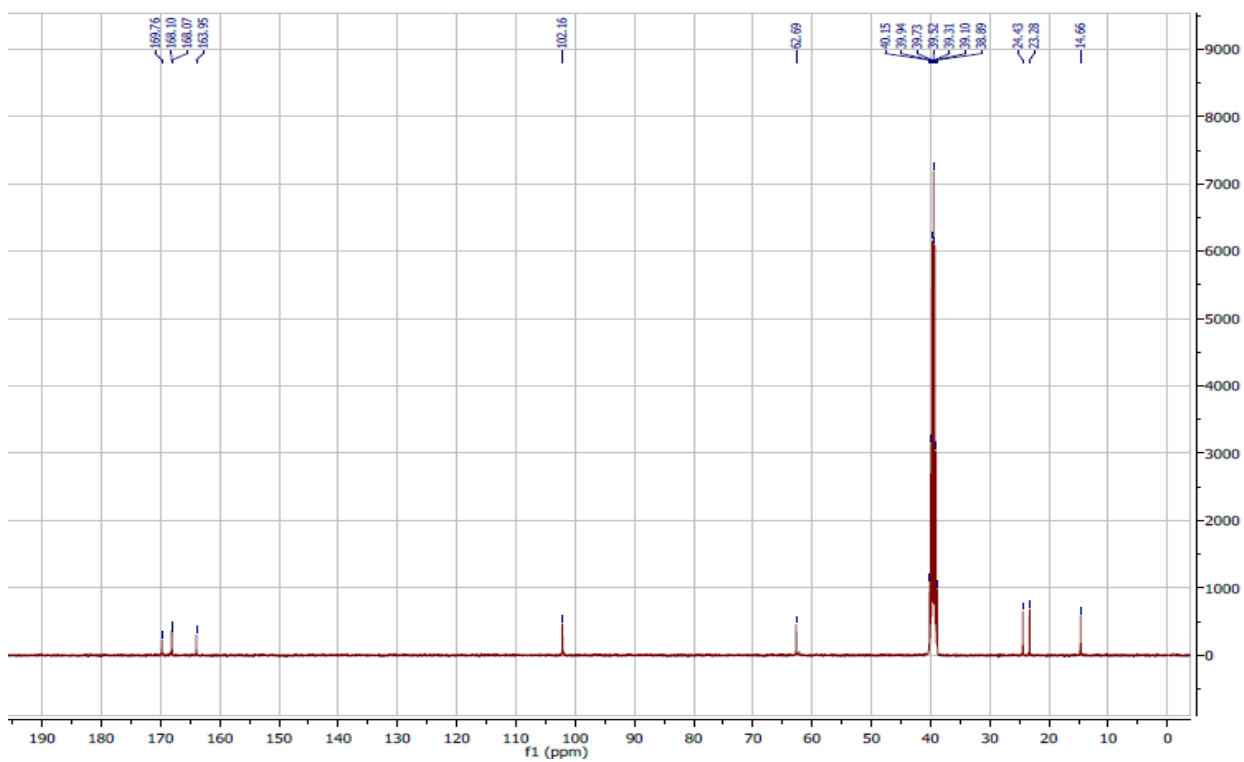

**Figure S22:**  $^{13}\text{C}$  NMR spectrum of compound **13** ( $\text{DMSO-}d_6$ ).

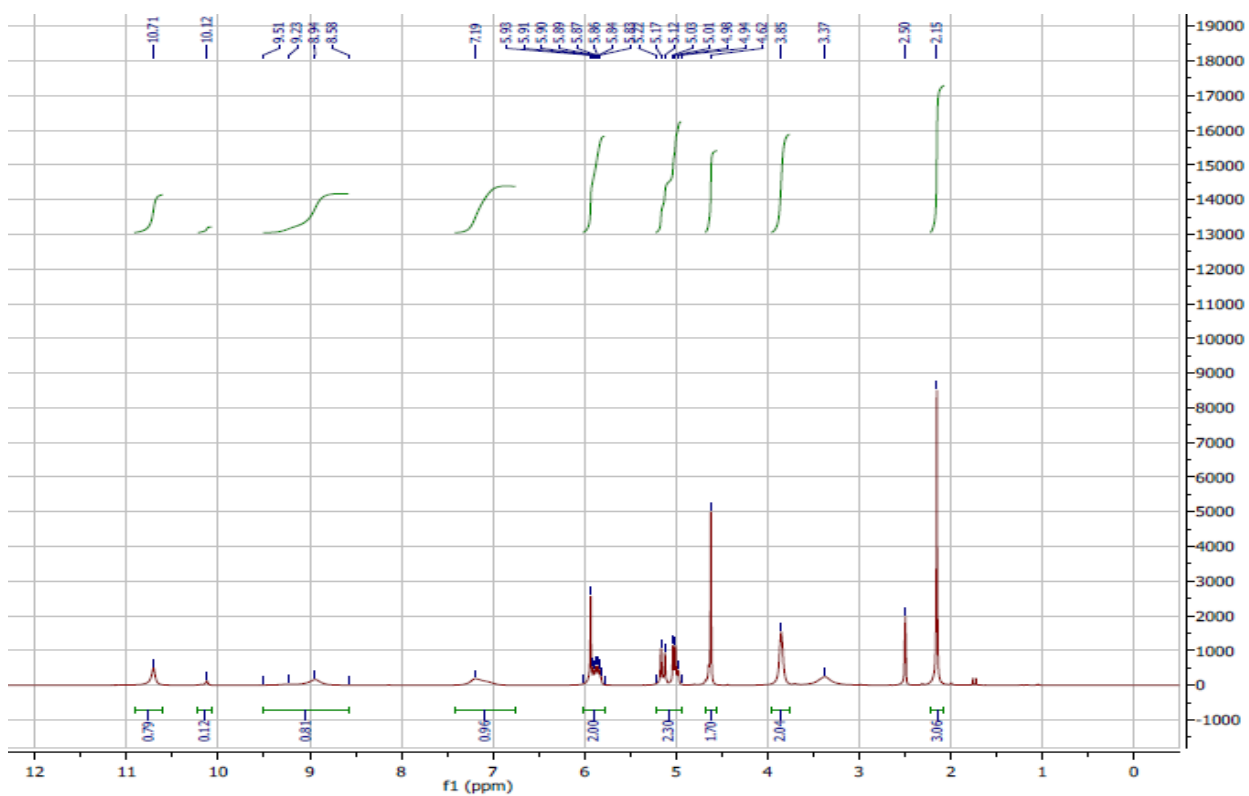

**Figure S23:**  $^1\text{H}$  NMR spectrum of compound **14** ( $\text{DMSO-}d_6$ ).

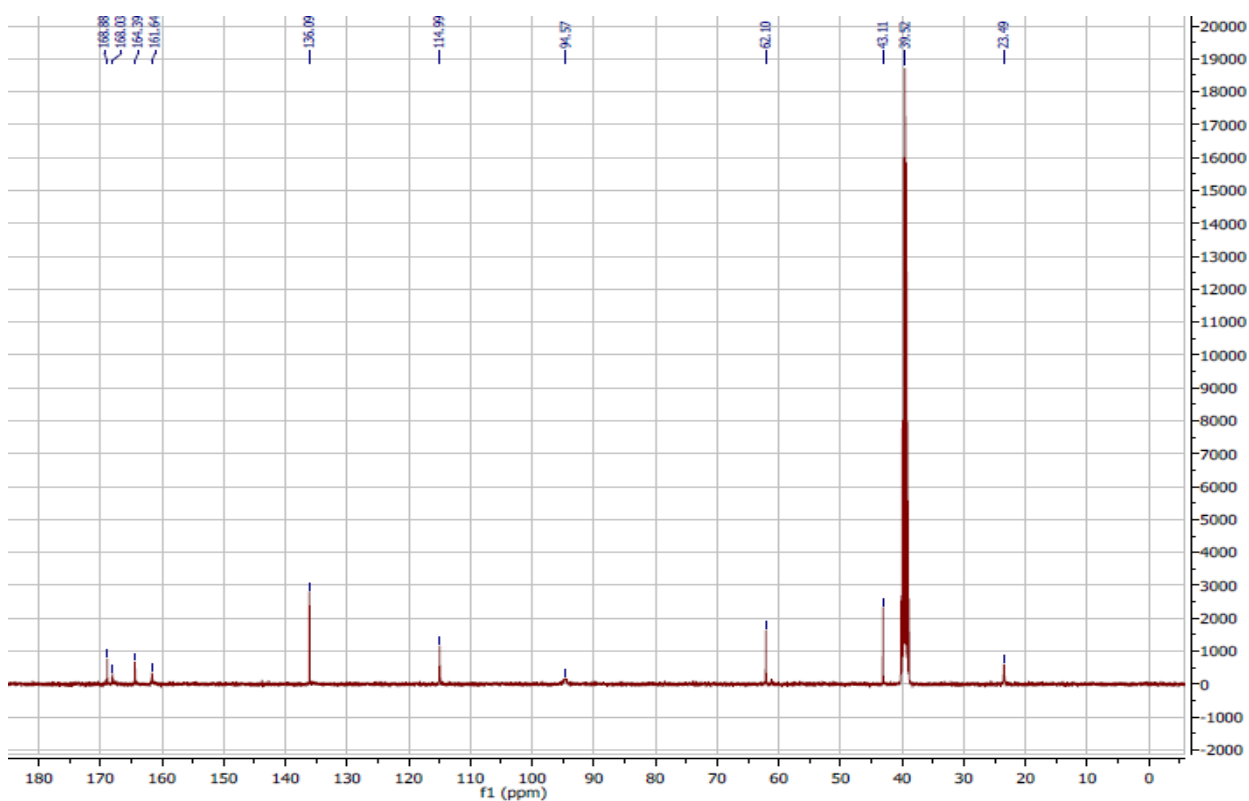

**Figure S24:**  $^{13}\text{C}$  NMR spectrum of compound **14** ( $\text{DMSO-}d_6$ ).

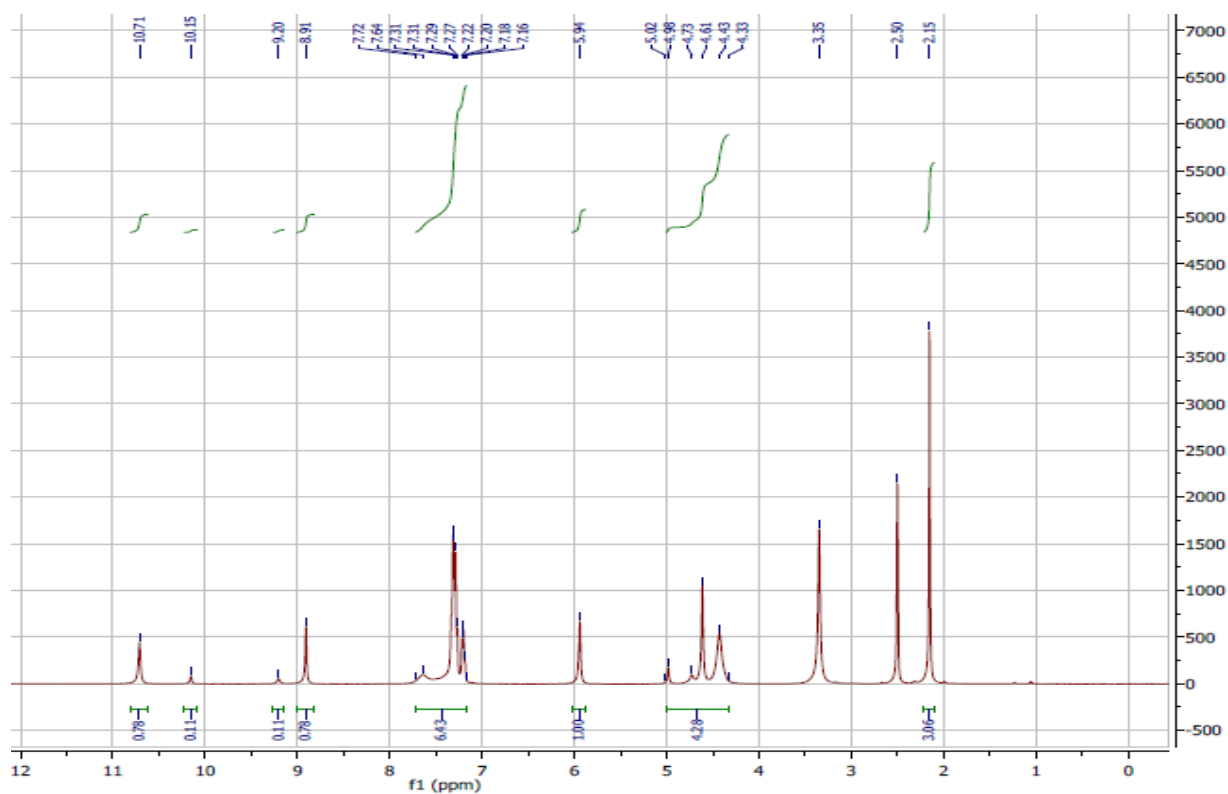

Figure S25:  $^1\text{H}$  NMR spectrum of compound **15** ( $\text{DMSO-}d_6$ ).

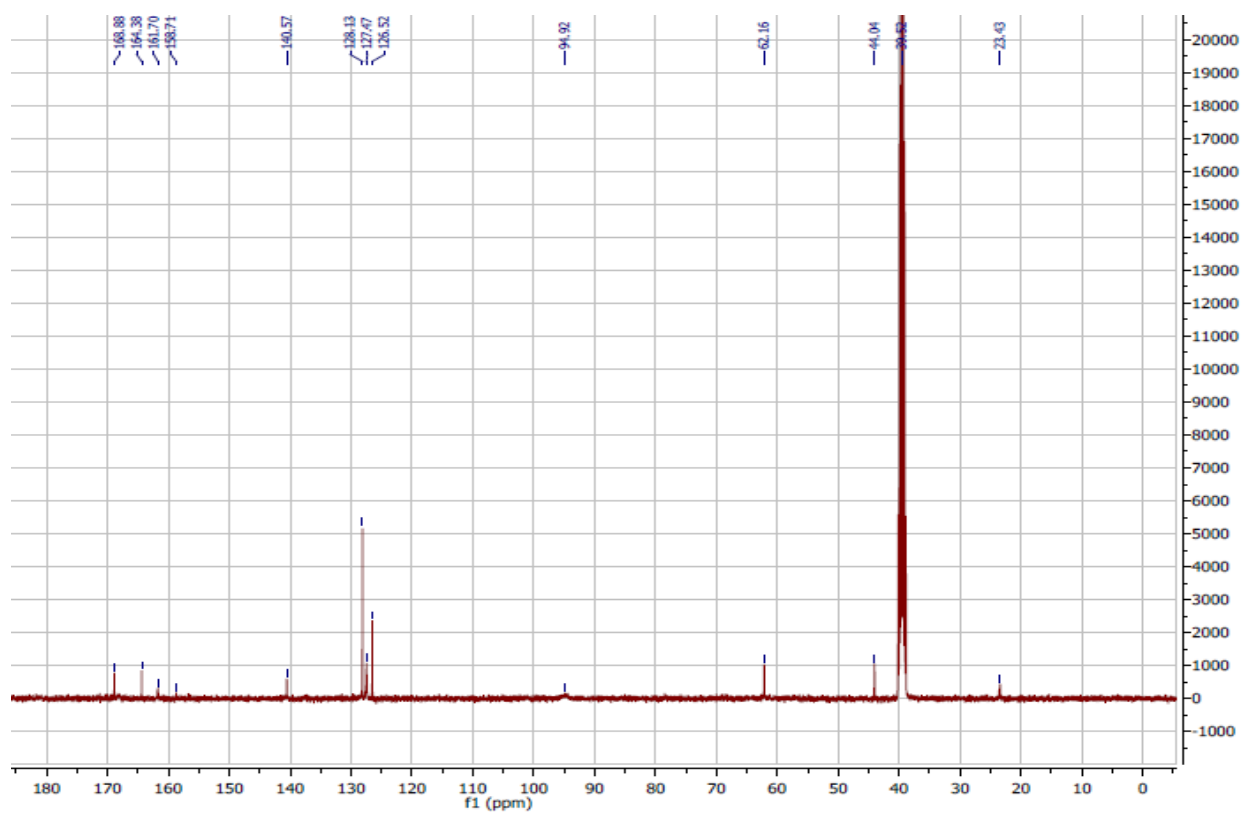

Figure S26:  $^{13}\text{C}$  NMR spectrum of compound **15** ( $\text{DMSO-}d_6$ ).

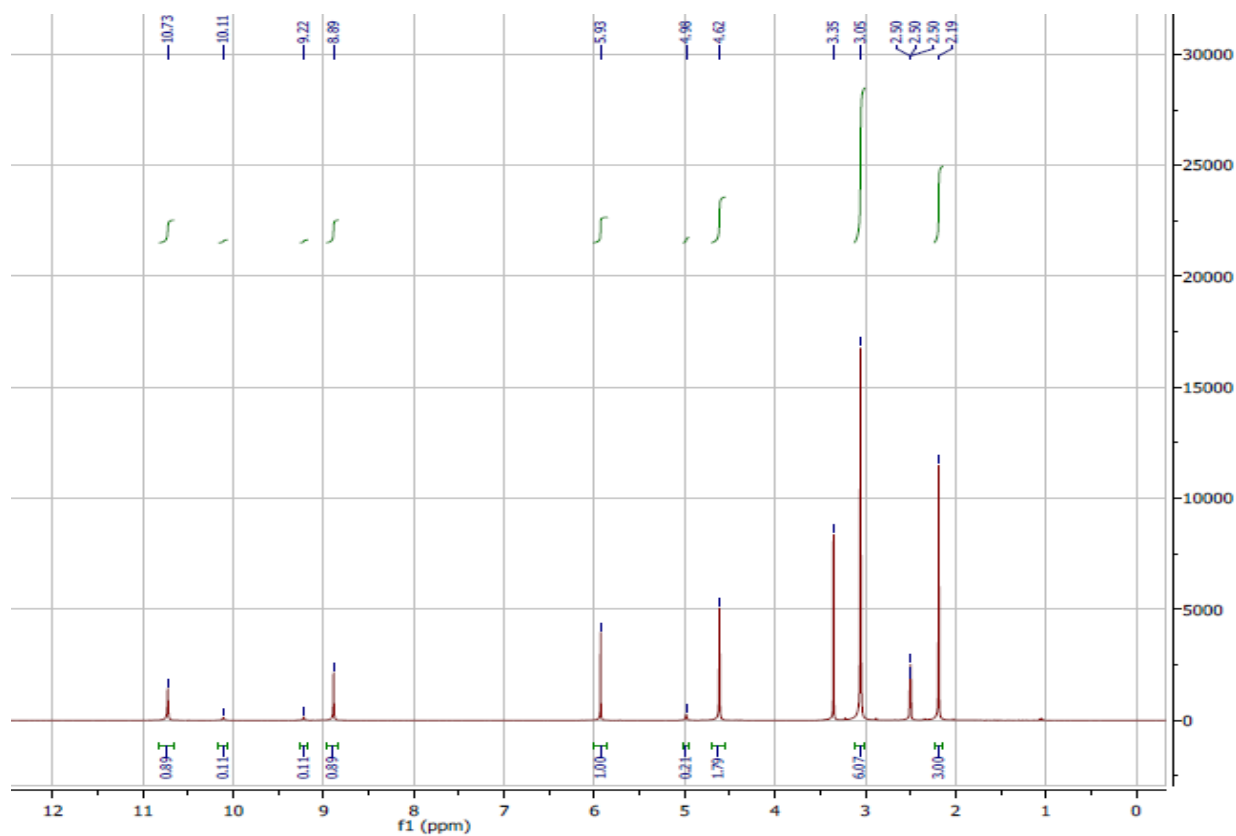

**Figure S27:**  $^1\text{H}$  NMR spectrum of compound **16** ( $\text{DMSO-}d_6$ ).

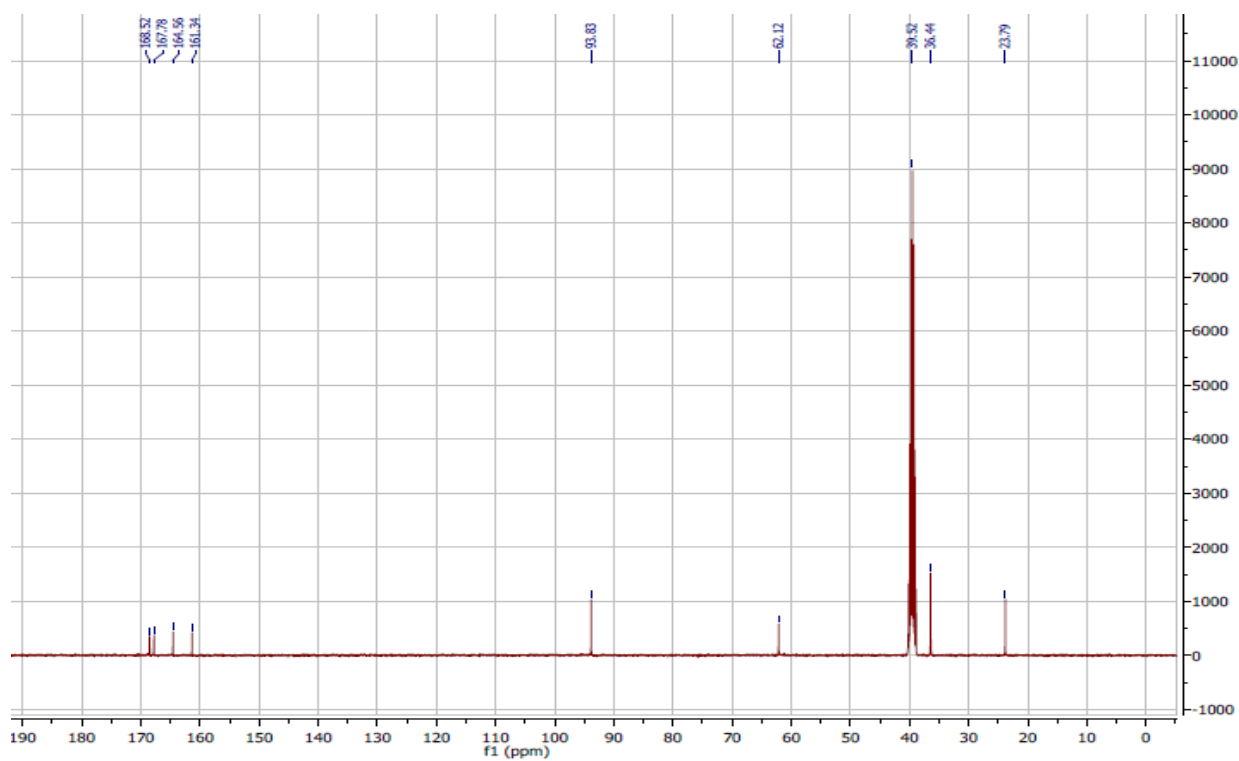

**Figure S28:**  $^{13}\text{C}$  NMR spectrum of compound **16** ( $\text{DMSO-}d_6$ ).

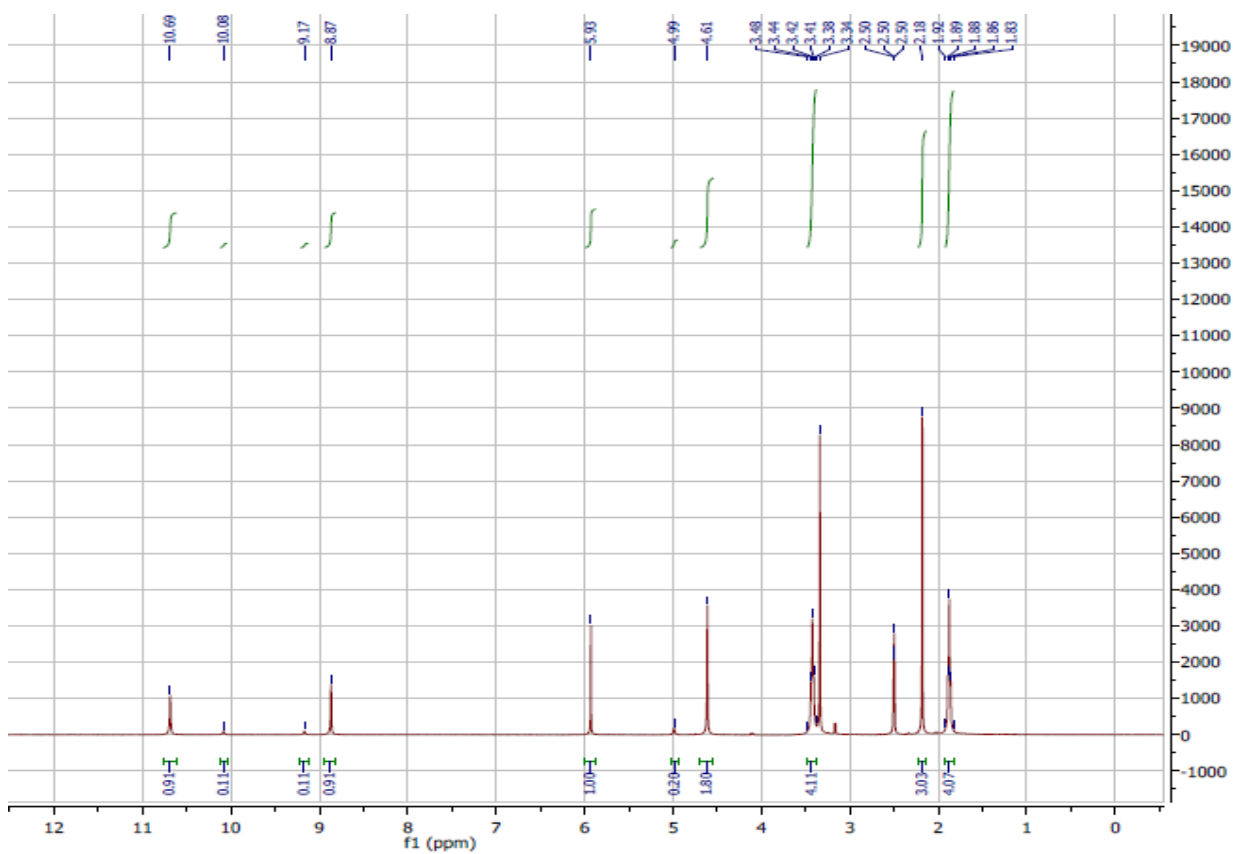

**Figure S29:**  $^1\text{H}$  NMR spectrum of compound **17** ( $\text{DMSO-}d_6$ ).

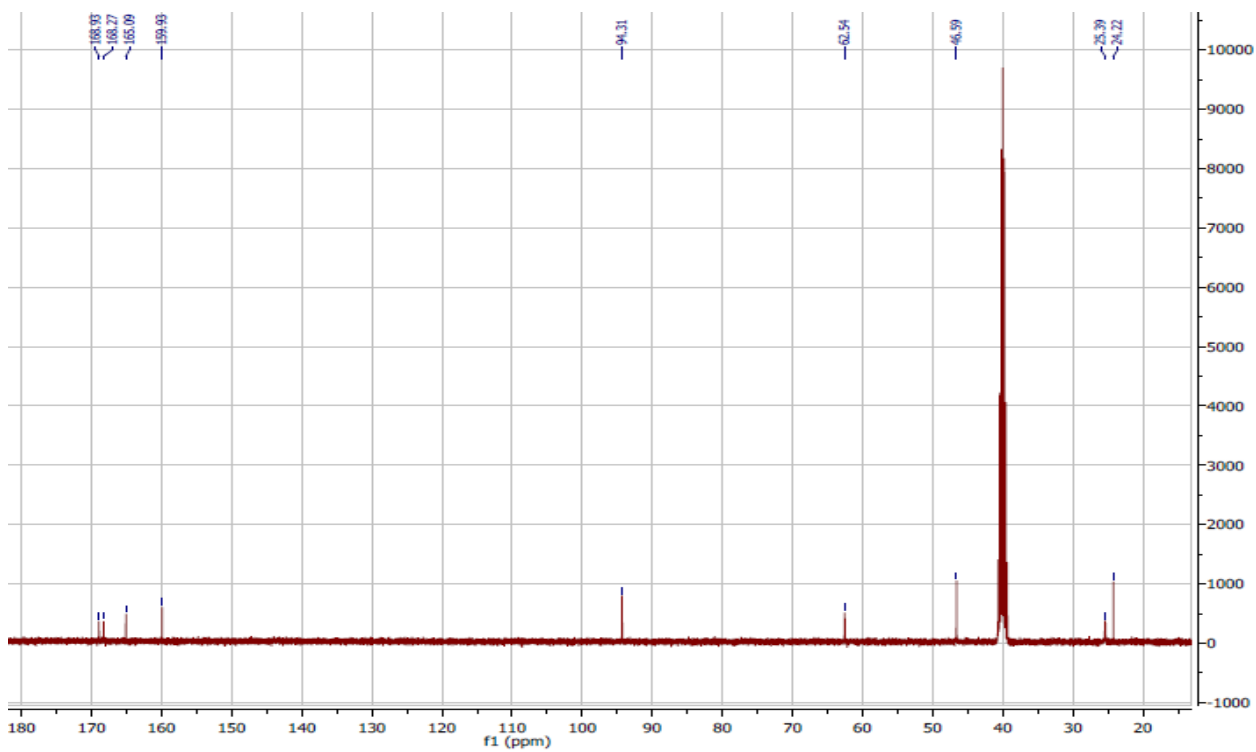

**Figure S30:**  $^{13}\text{C}$  NMR spectrum of compound **17** ( $\text{DMSO-}d_6$ ).

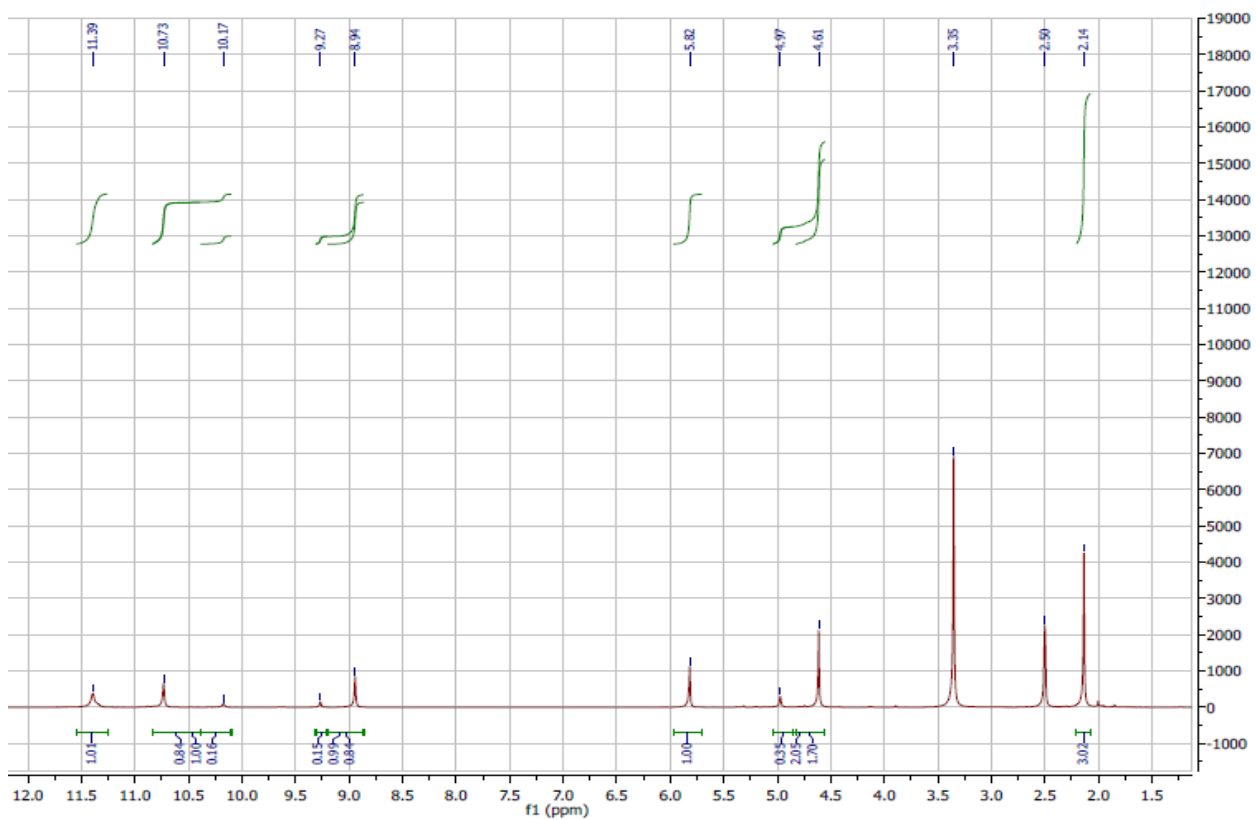

**Figure S31:**  $^1\text{H}$  NMR spectrum of compound **18** ( $\text{DMSO-}d_6$ ).

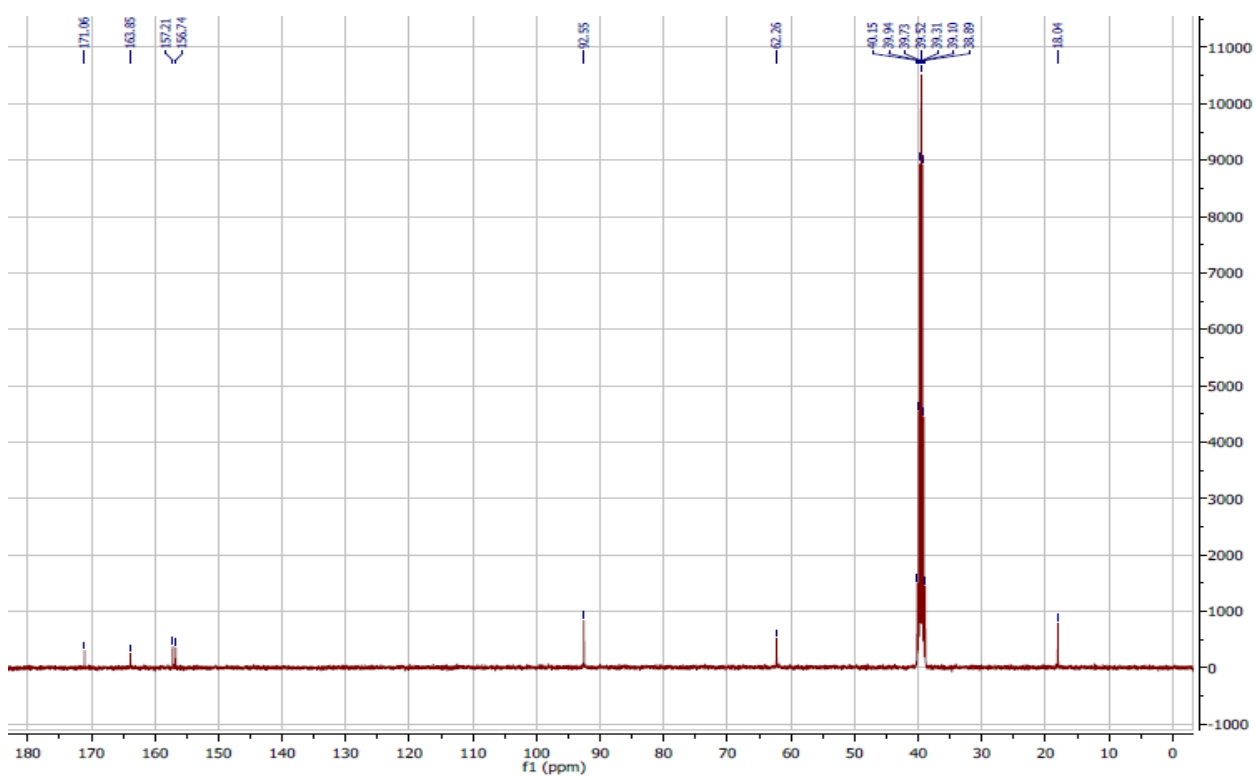

**Figure S32:**  $^{13}\text{C}$  NMR spectrum of compound **18** ( $\text{DMSO-}d_6$ ).



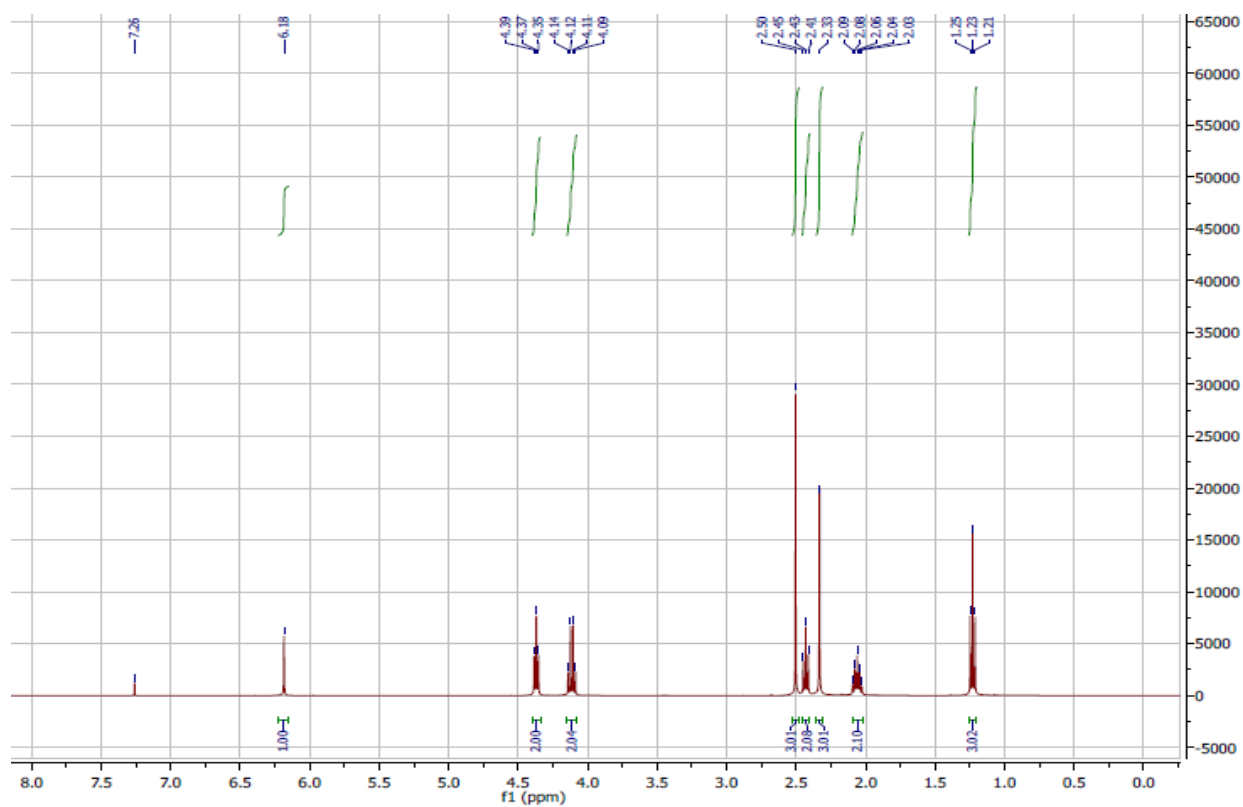

**Figure S33:**  $^1\text{H}$  NMR spectrum of compound **20a** ( $\text{CDCl}_3$ ).

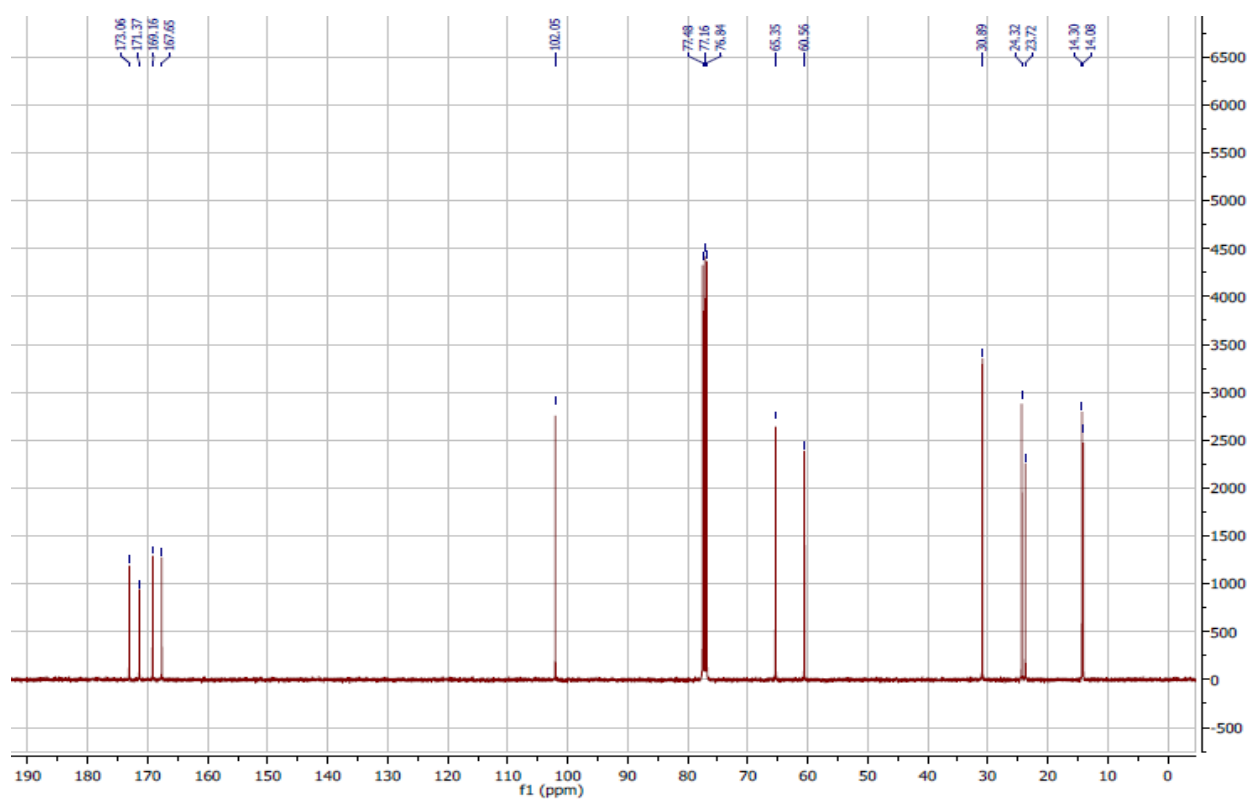

**Figure S34:**  $^{13}\text{C}$  NMR spectrum of compound **20a** ( $\text{CDCl}_3$ ).

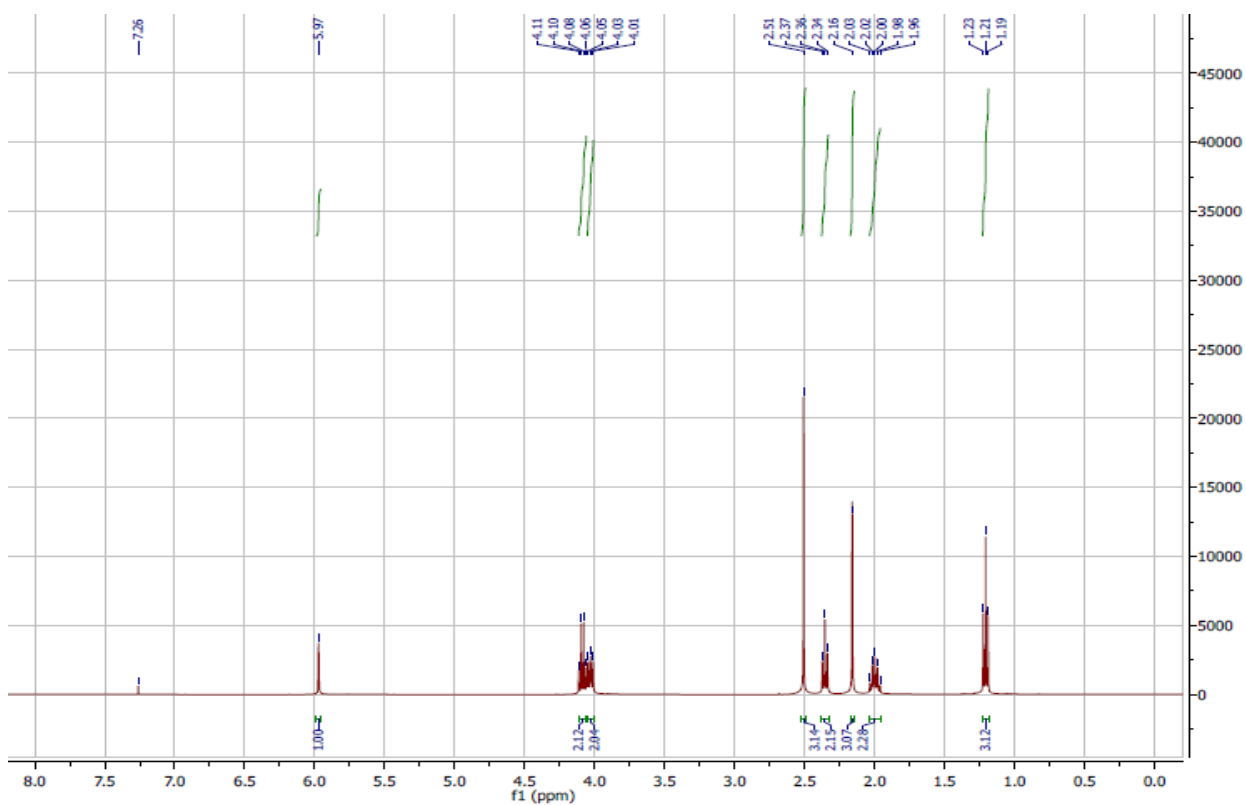

**Figure S35:**  $^1\text{H}$  NMR spectrum of compound **20b** ( $\text{CDCl}_3$ ).

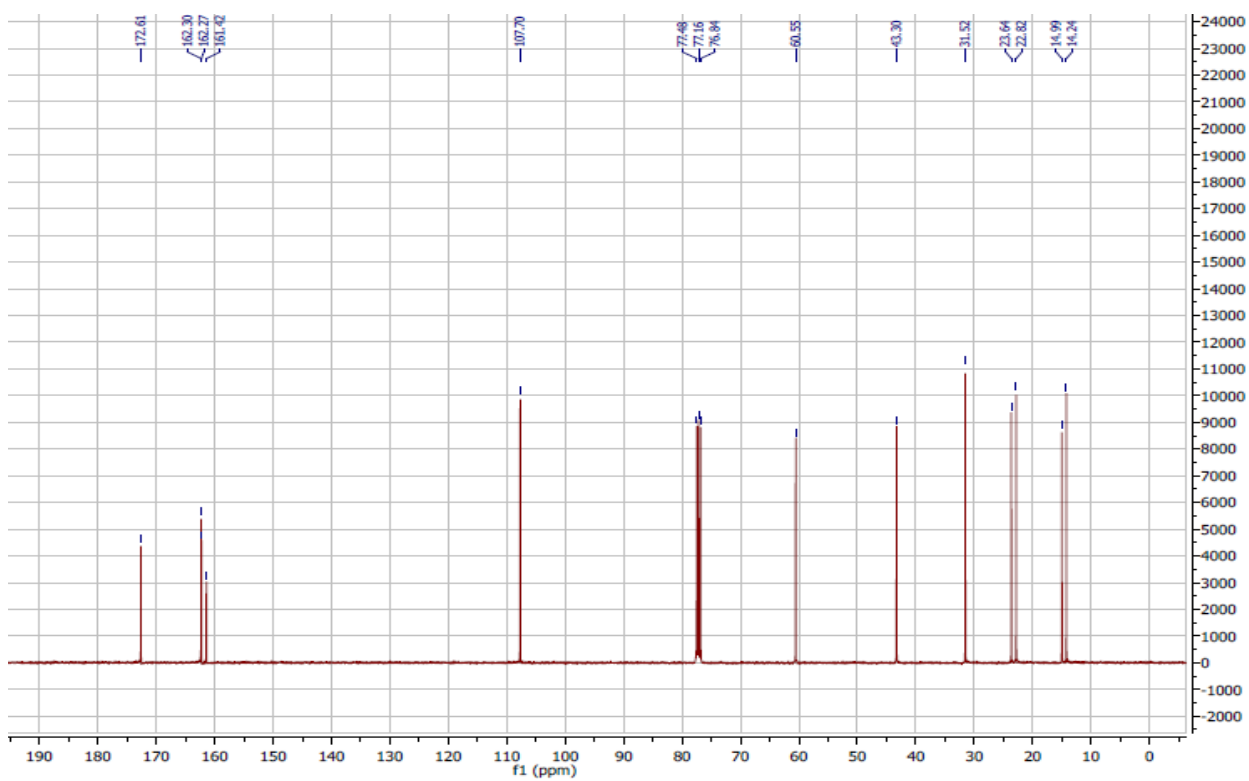

**Figure S36:**  $^{13}\text{C}$  NMR spectrum of compound **20b** ( $\text{CDCl}_3$ ).

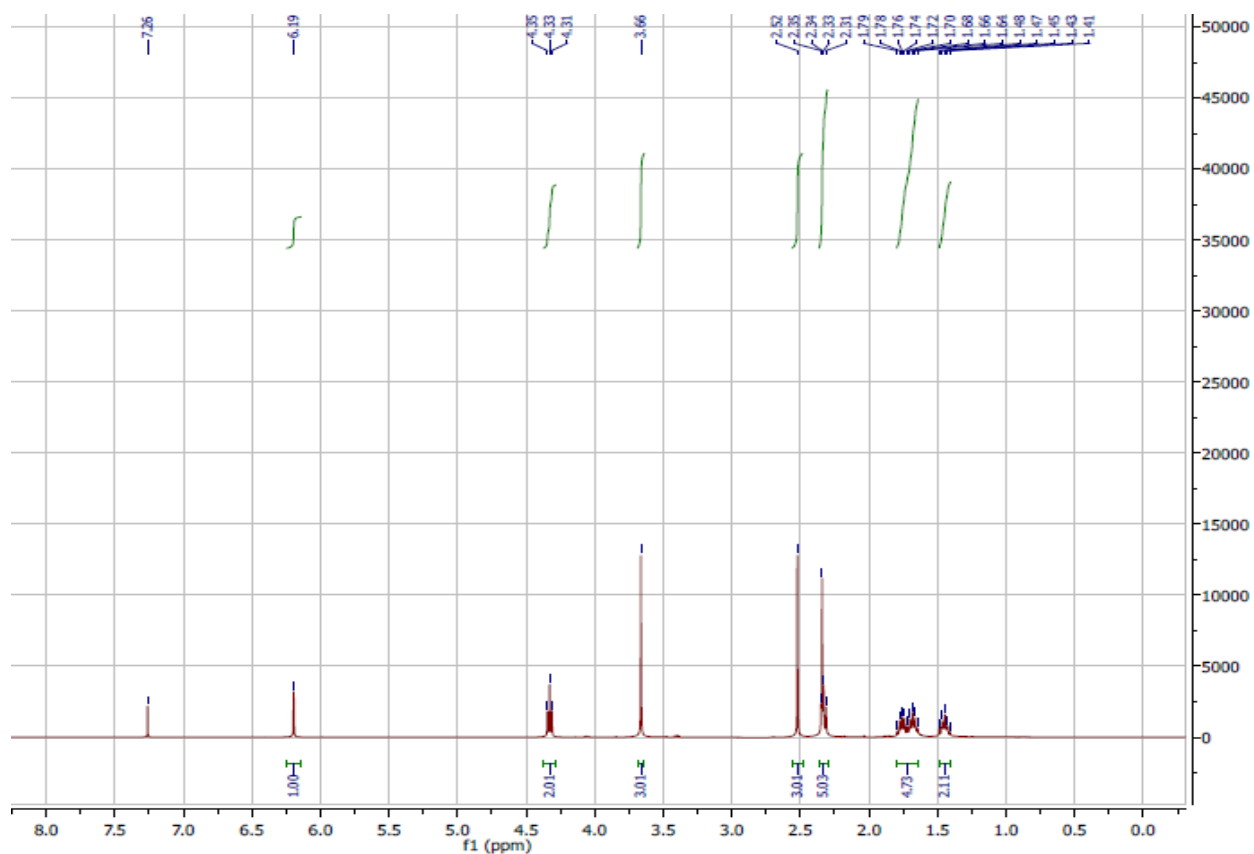

**Figure S37:**  $^1\text{H}$  NMR spectrum of compound **21a** ( $\text{CDCl}_3$ ).

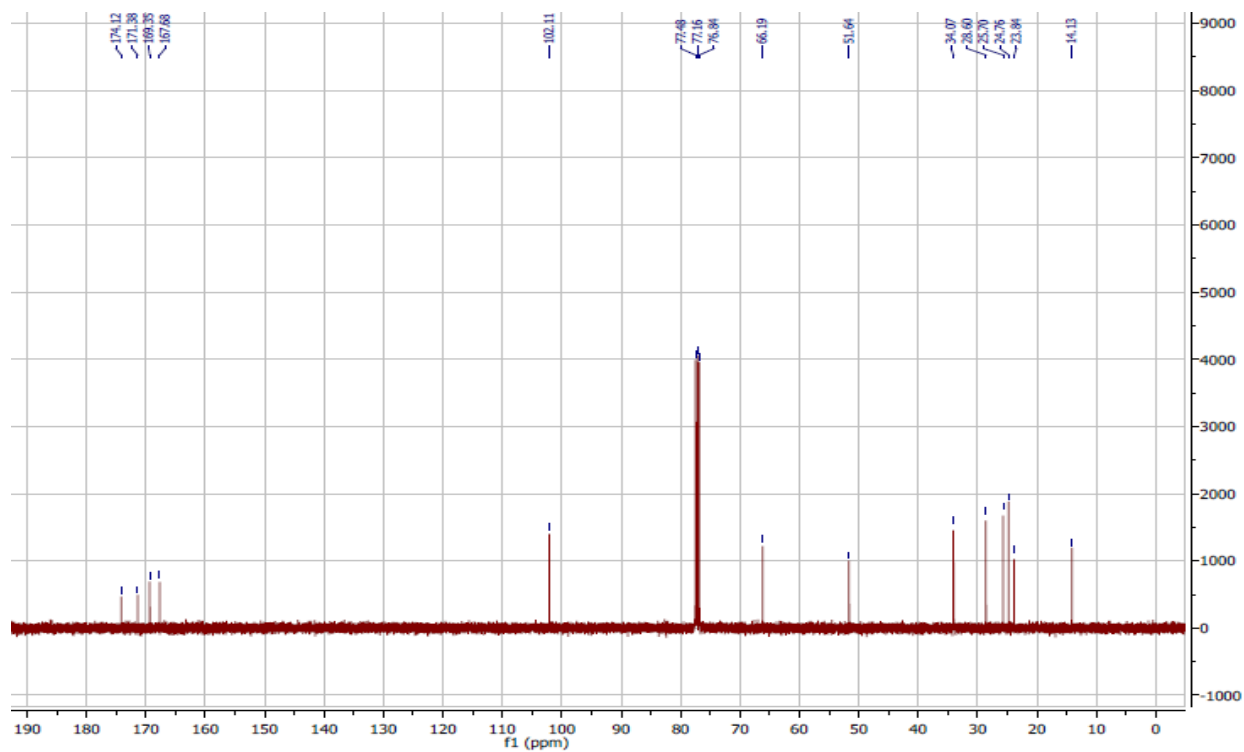

**Figure S38:**  $^{13}\text{C}$  NMR spectrum of compound **21a** ( $\text{CDCl}_3$ ).

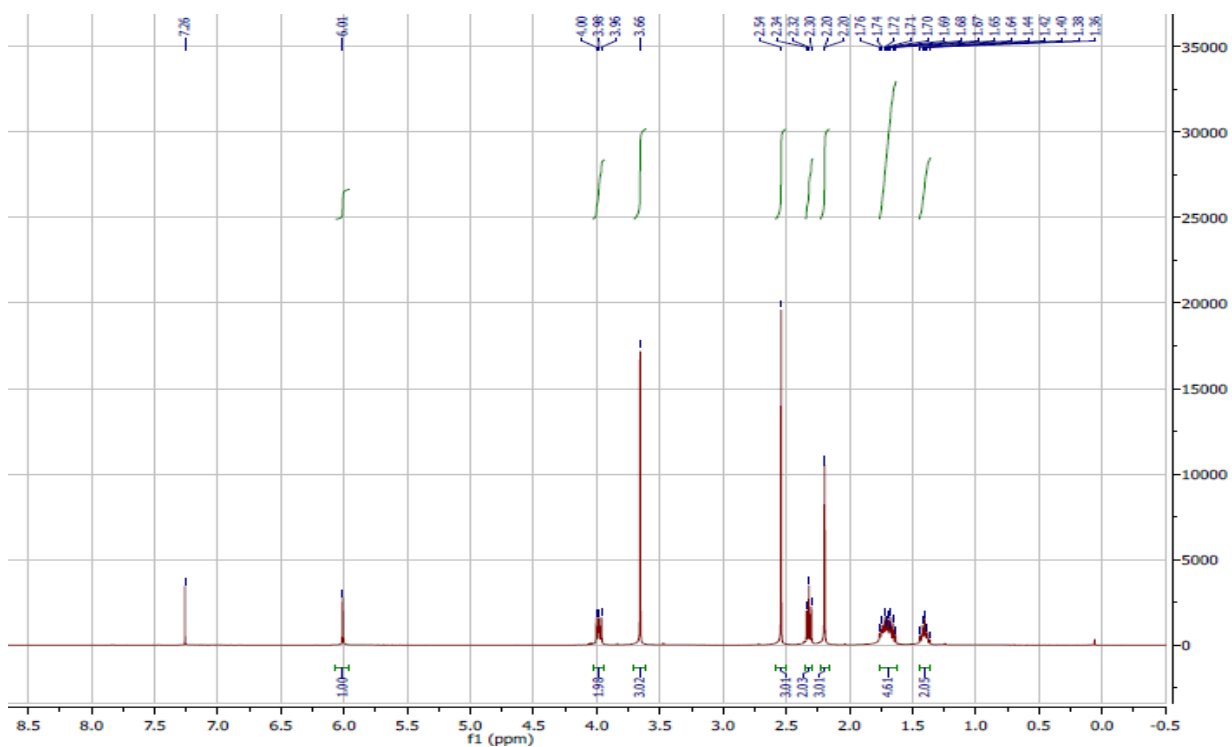

**Figure S39:**  $^1\text{H}$  NMR spectrum of compound **21b** ( $\text{CDCl}_3$ ).

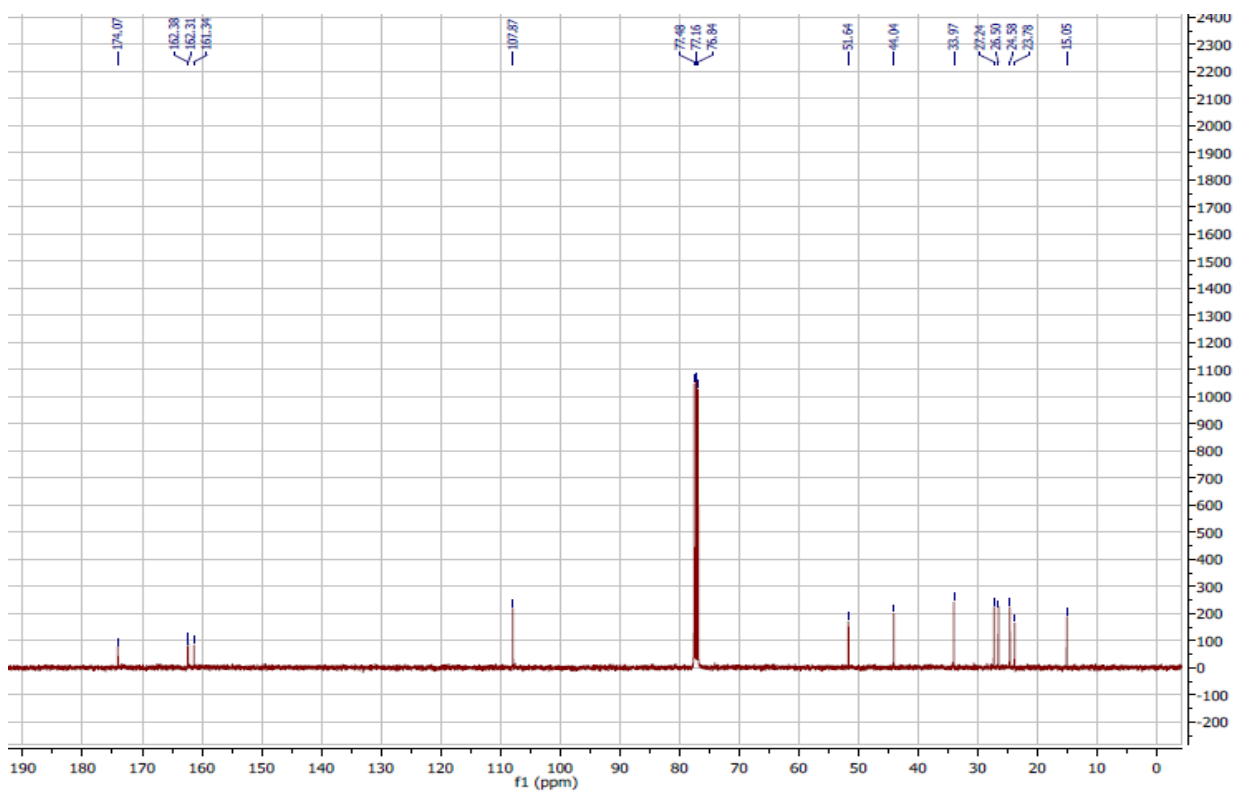

**Figure S40:**  $^{13}\text{C}$  NMR spectrum of compound **21a** ( $\text{CDCl}_3$ ).

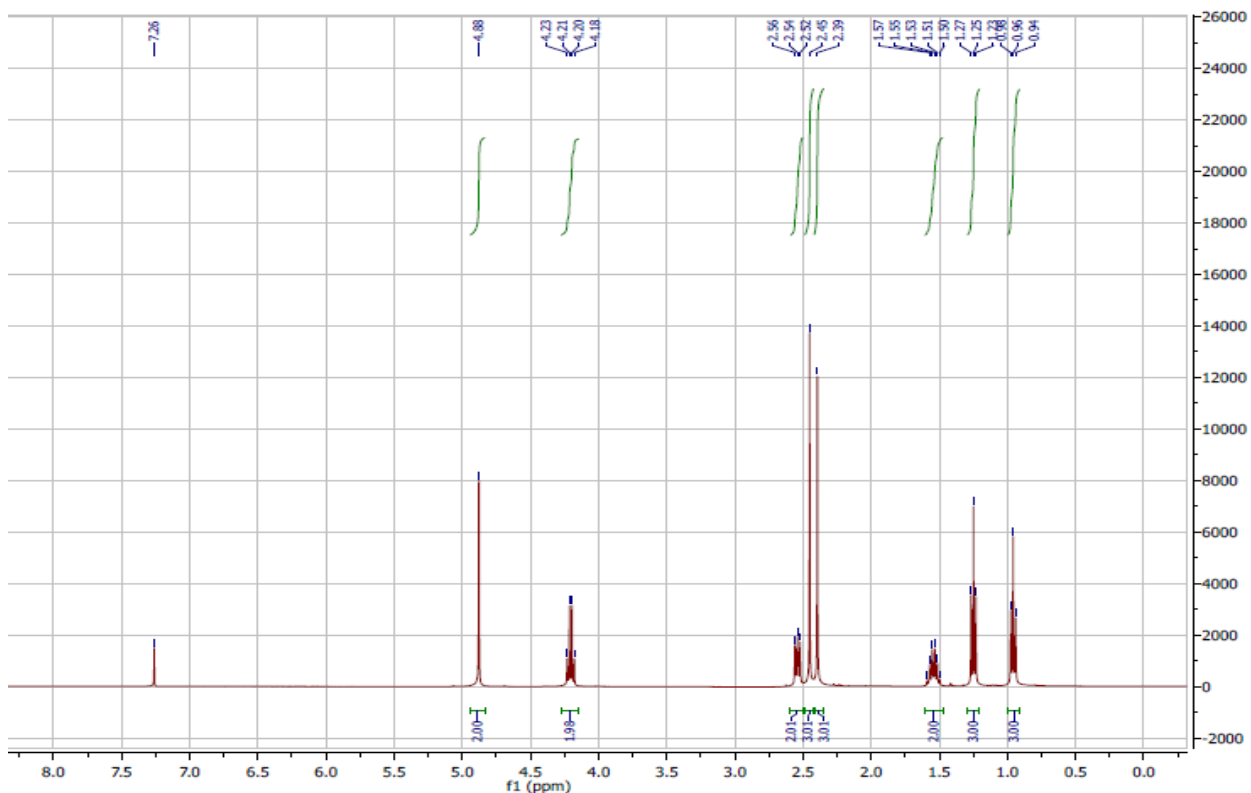

**Figure S41:**  $^1\text{H}$  NMR spectrum of compound **22a** ( $\text{CDCl}_3$ ).

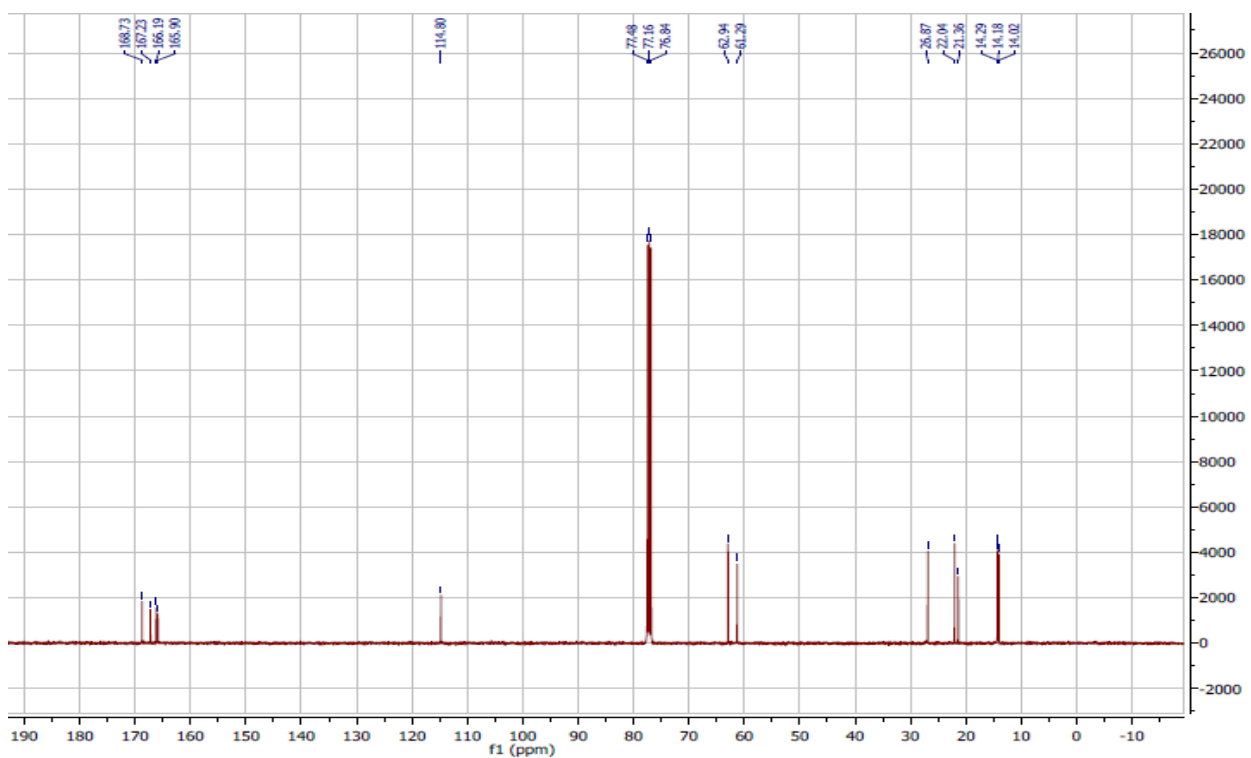

**Figure S42:**  $^{13}\text{C}$  NMR spectrum of compound **22a** ( $\text{CDCl}_3$ ).

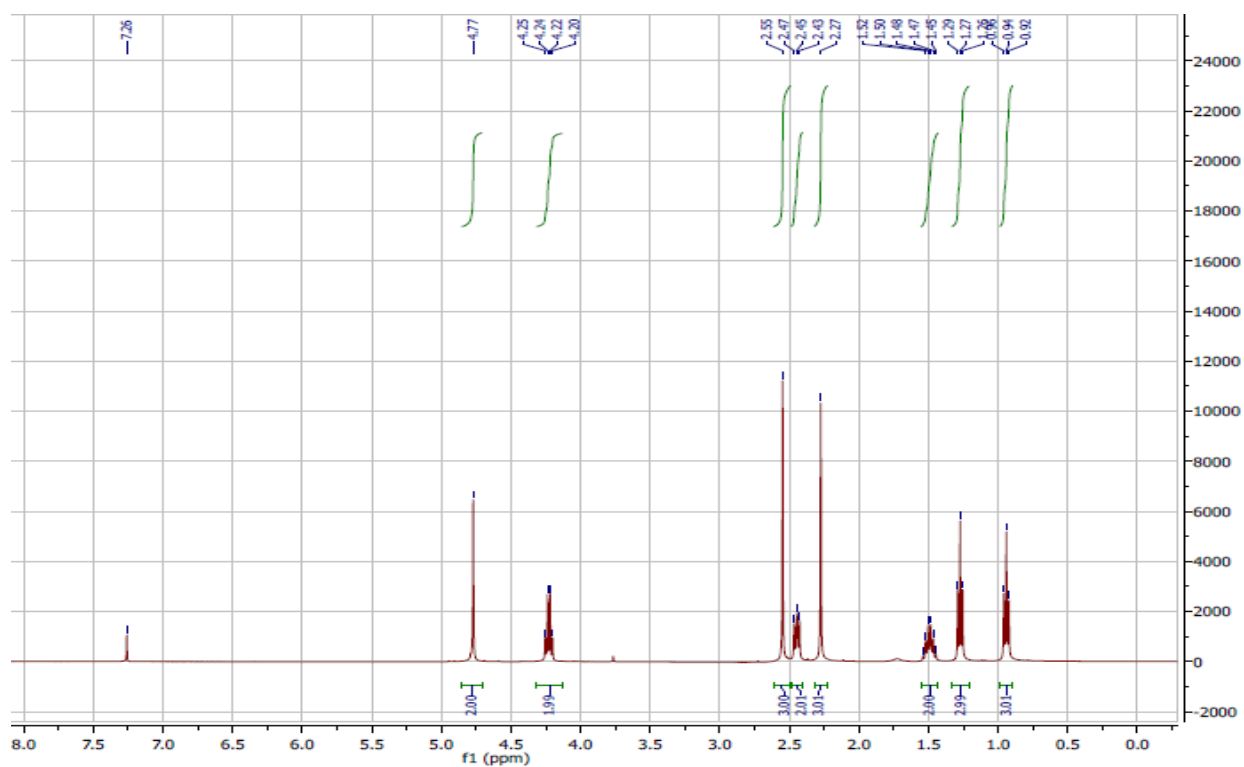

**Figure S43:**  $^1\text{H}$  NMR spectrum of compound **22b** ( $\text{CDCl}_3$ ).

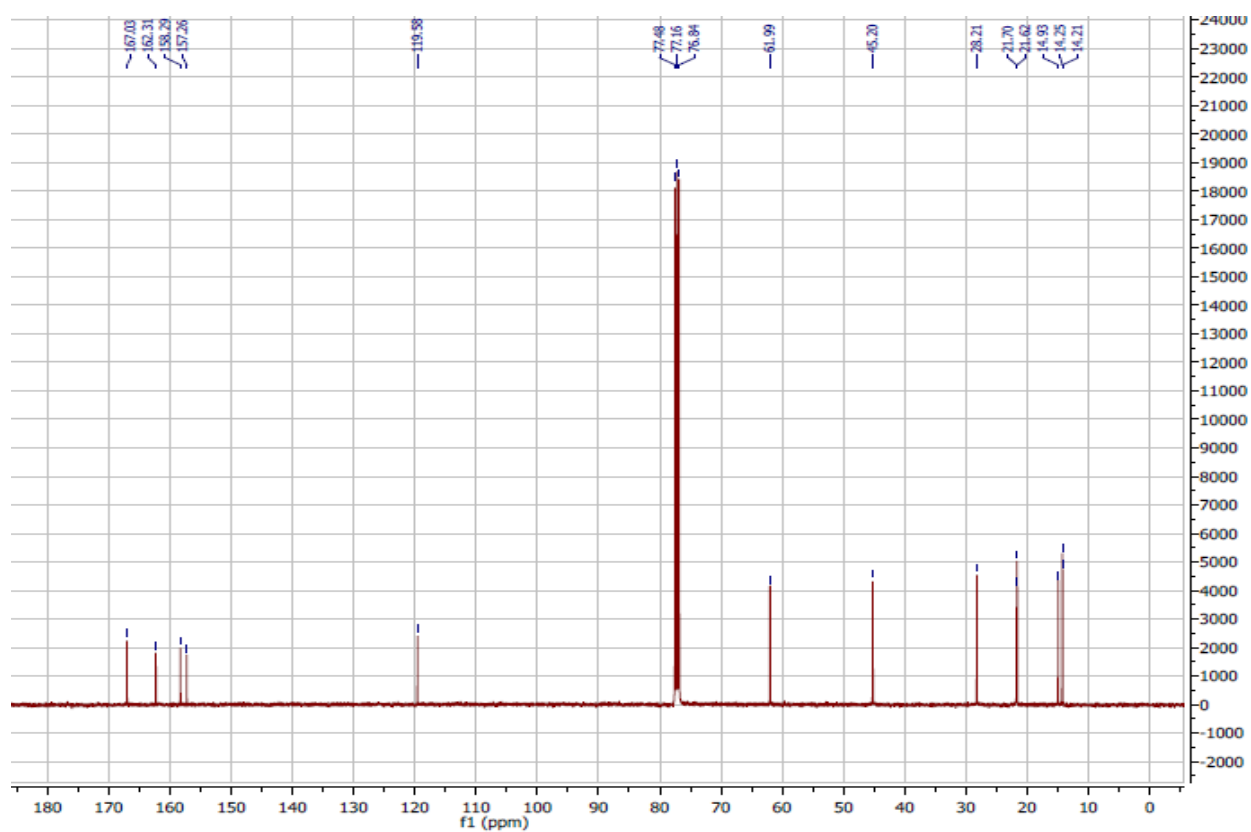

**Figure S44:**  $^{13}\text{C}$  NMR spectrum of compound **22b** ( $\text{CDCl}_3$ ).

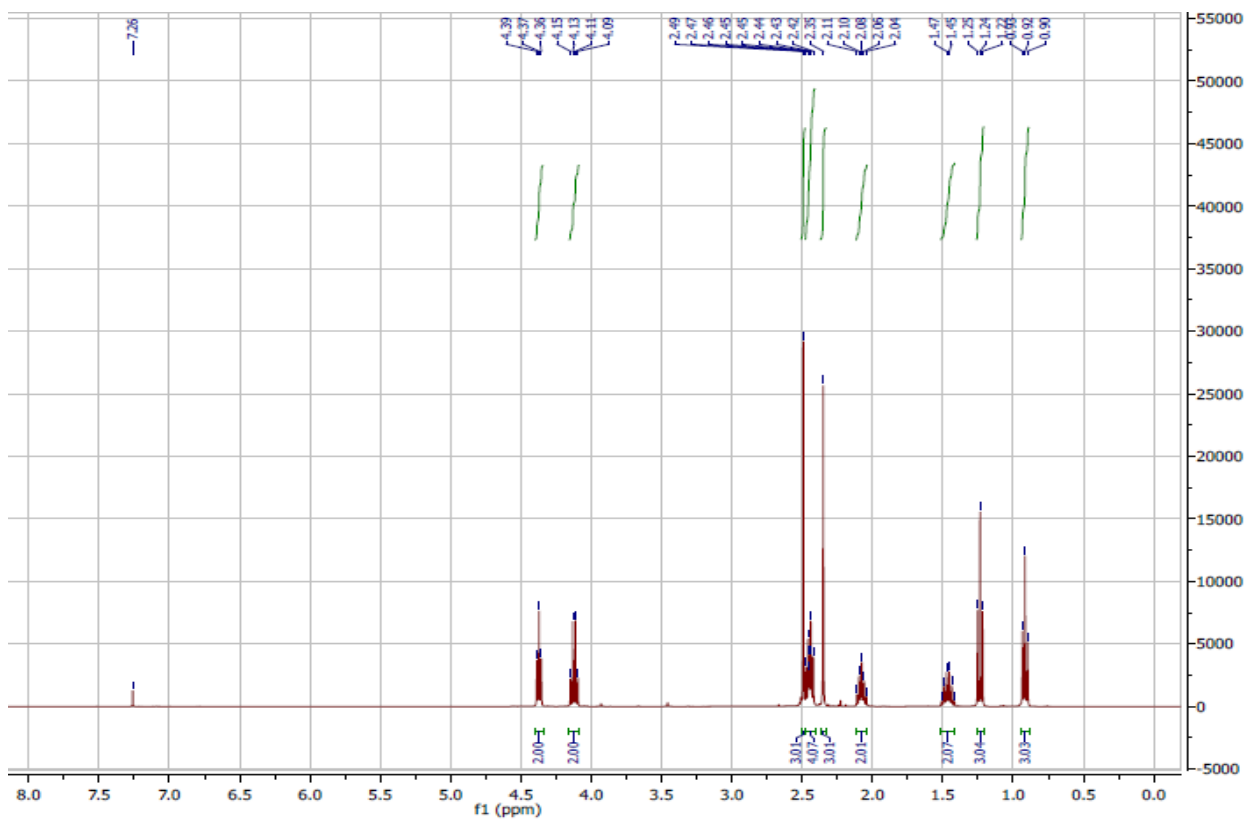

**Figure S45:**  $^1\text{H}$  NMR spectrum of compound **23a** ( $\text{CDCl}_3$ ).

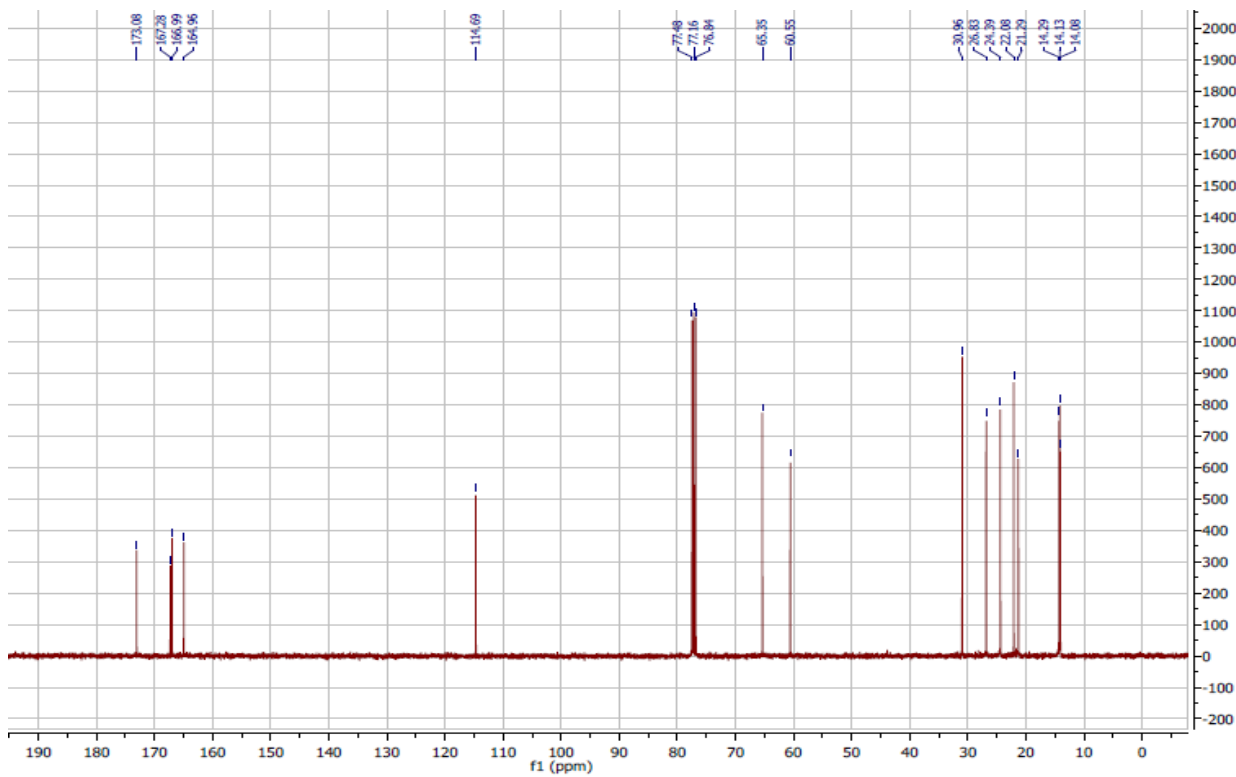

**Figure S46:**  $^{13}\text{C}$  NMR spectrum of compound **23a** ( $\text{CDCl}_3$ ).

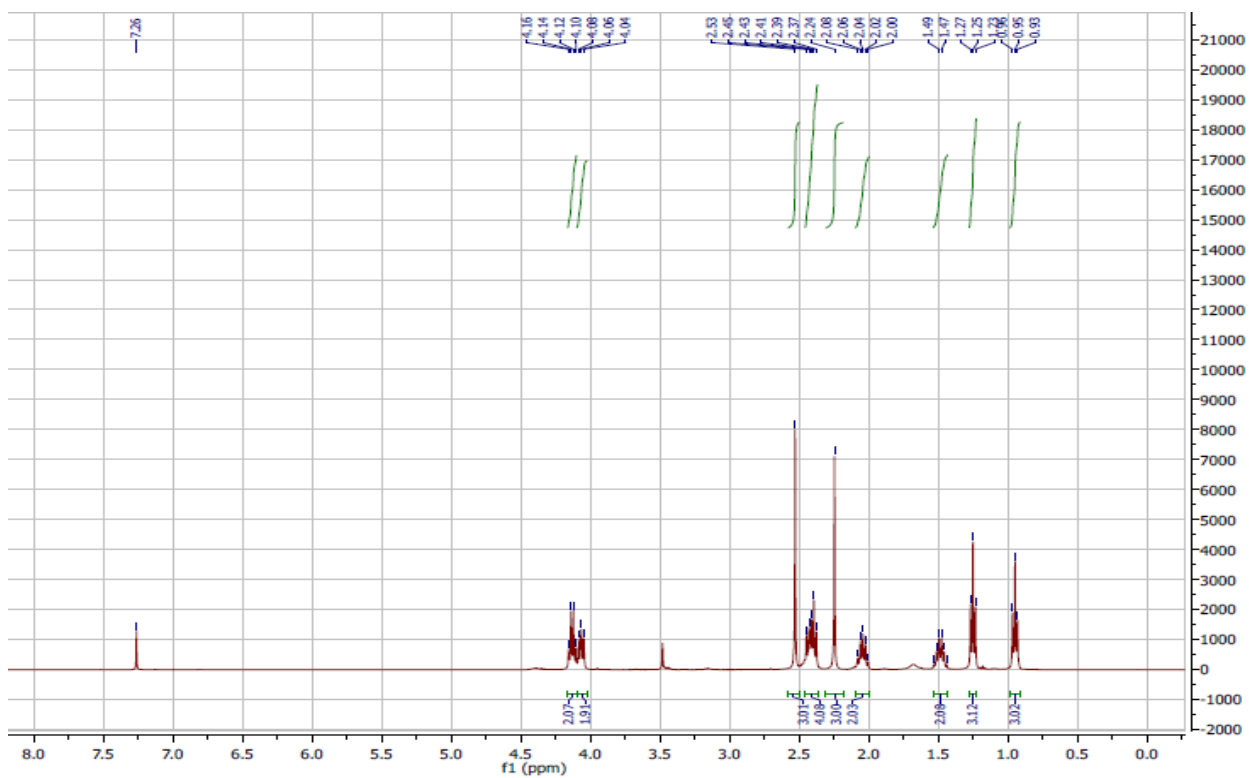

**Figure S47:**  $^1\text{H}$  NMR spectrum of compound **23b** ( $\text{CDCl}_3$ ).

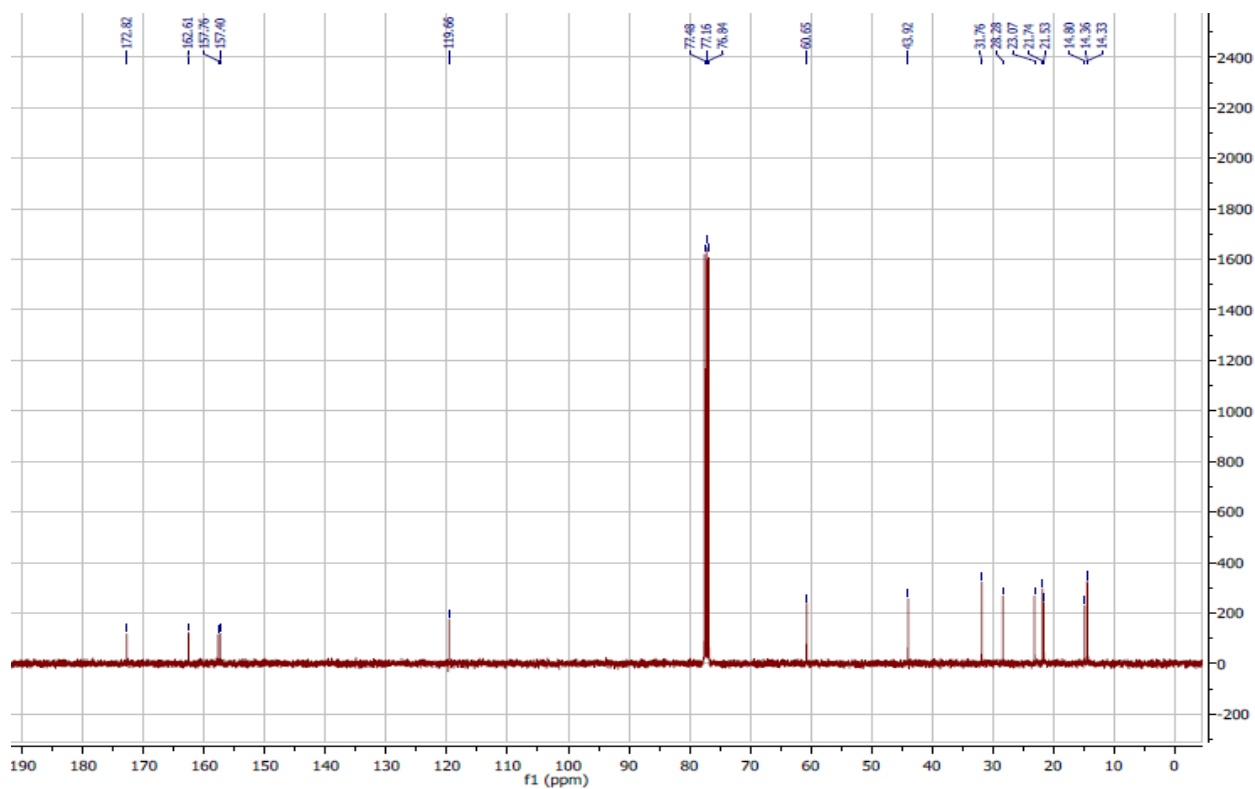

**Figure S48:**  $^{13}\text{C}$  NMR spectrum of compound **23b** ( $\text{CDCl}_3$ ).



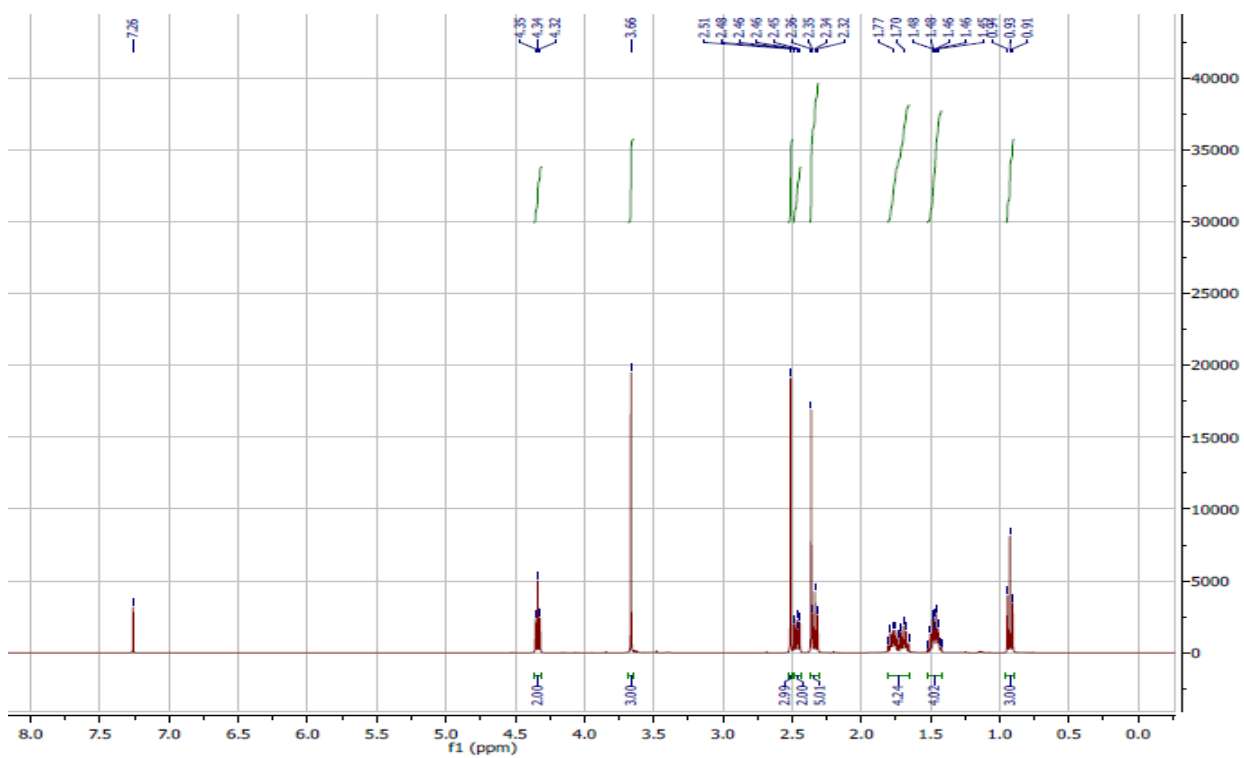

Figure S49:  $^1\text{H}$  NMR spectrum of compound **24a** ( $\text{CDCl}_3$ ).

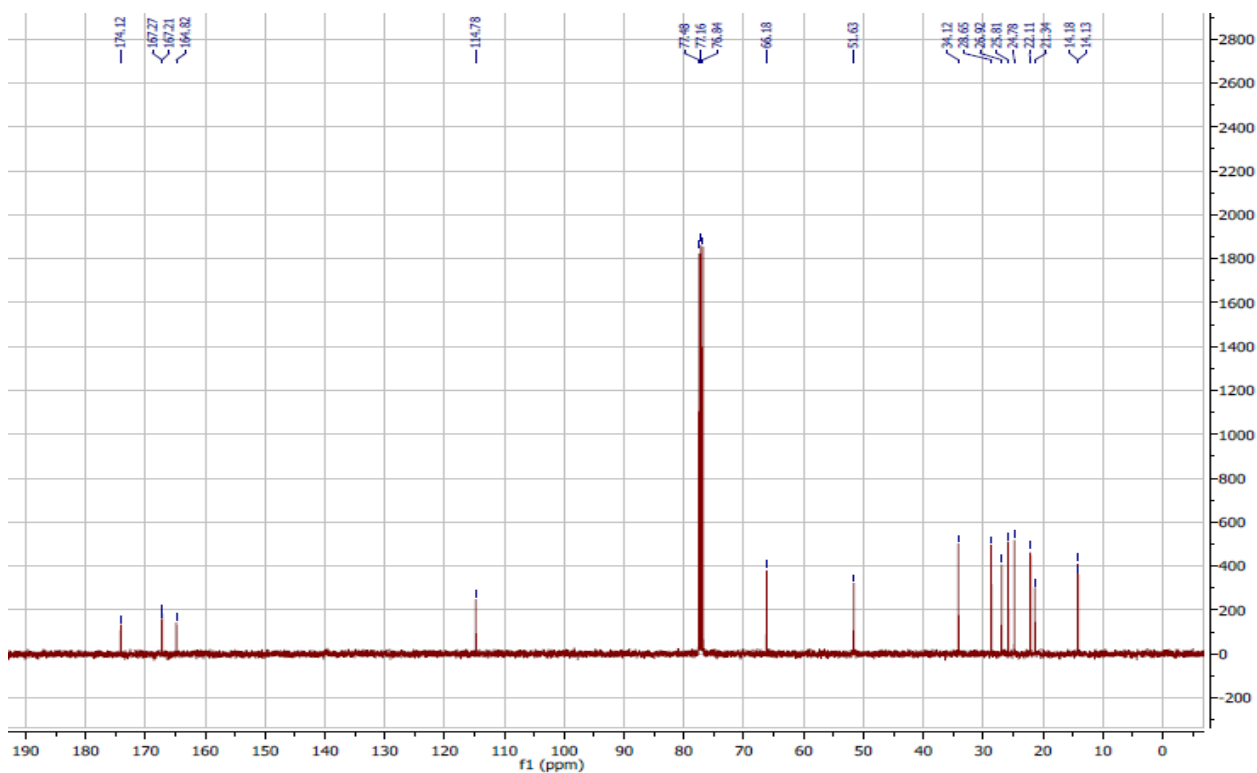

Figure S50:  $^{13}\text{C}$  NMR spectrum of compound **24a** ( $\text{CDCl}_3$ ).

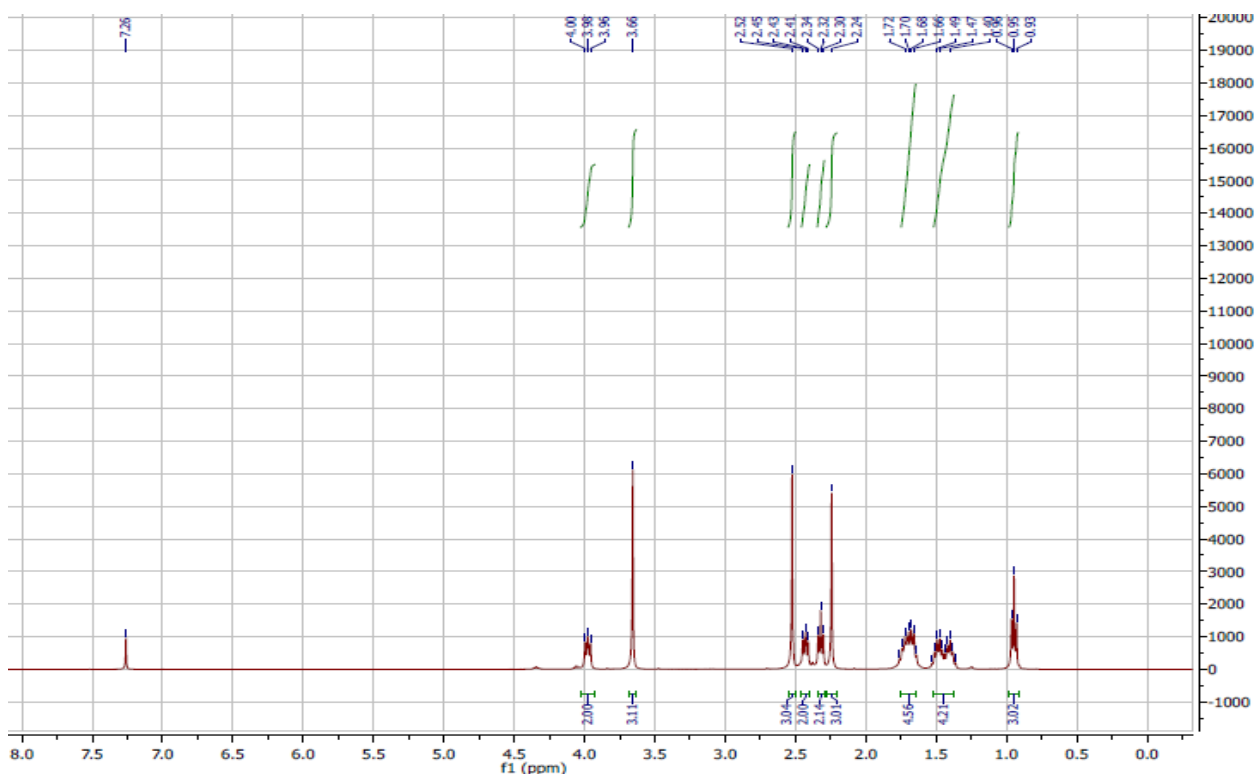

**Figure S51:**  $^1\text{H}$  NMR spectrum of compound **24b** ( $\text{CDCl}_3$ ).

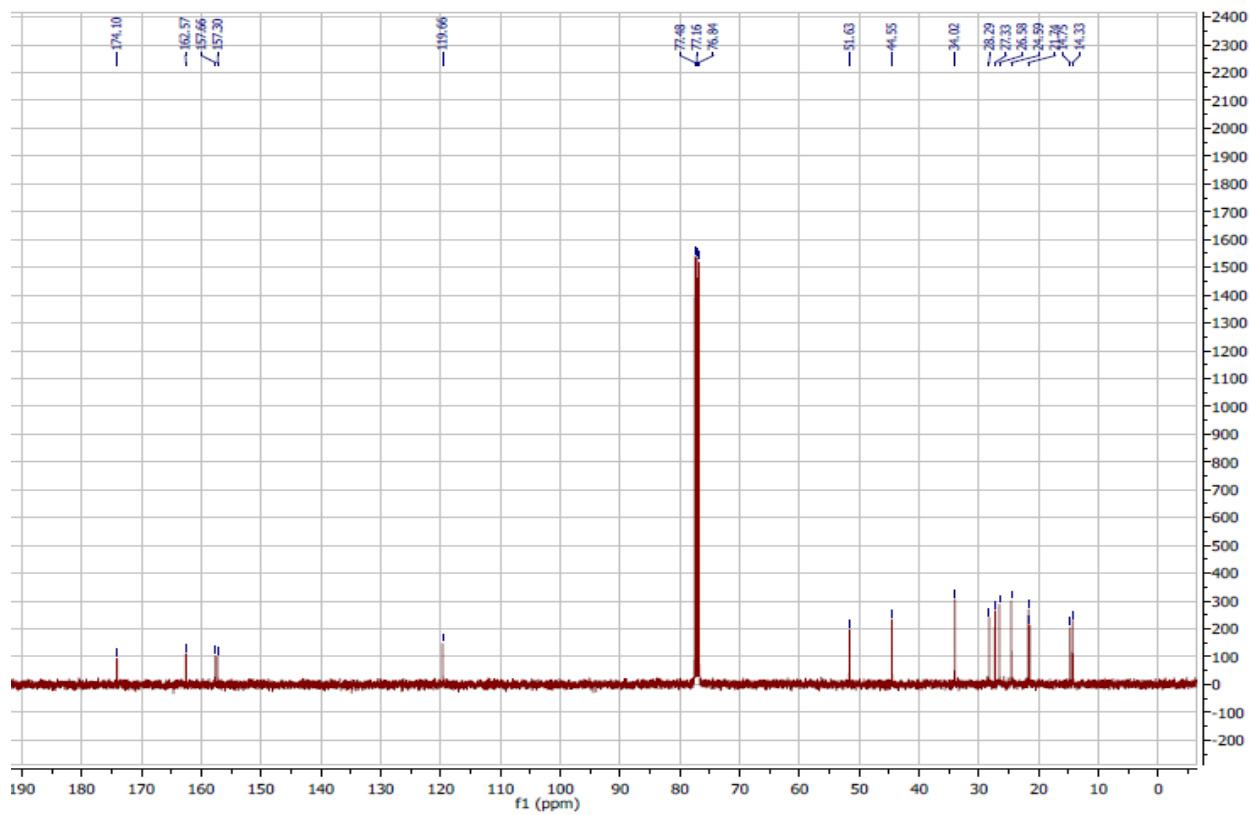

**Figure S52:**  $^{13}\text{C}$  NMR spectrum of compound **24b** ( $\text{CDCl}_3$ ).

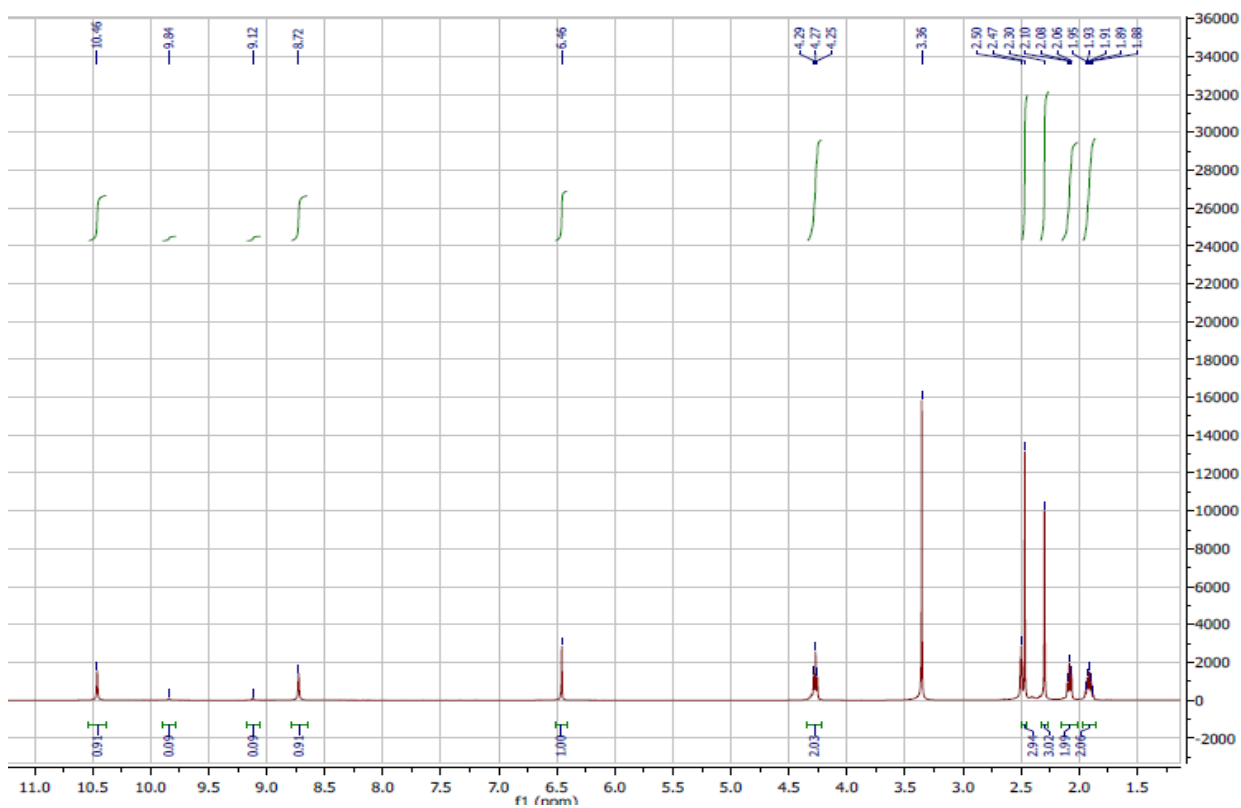

**Figure S53:**  $^1\text{H}$  NMR spectrum of compound **25** ( $\text{DMSO-}d_6$ ).

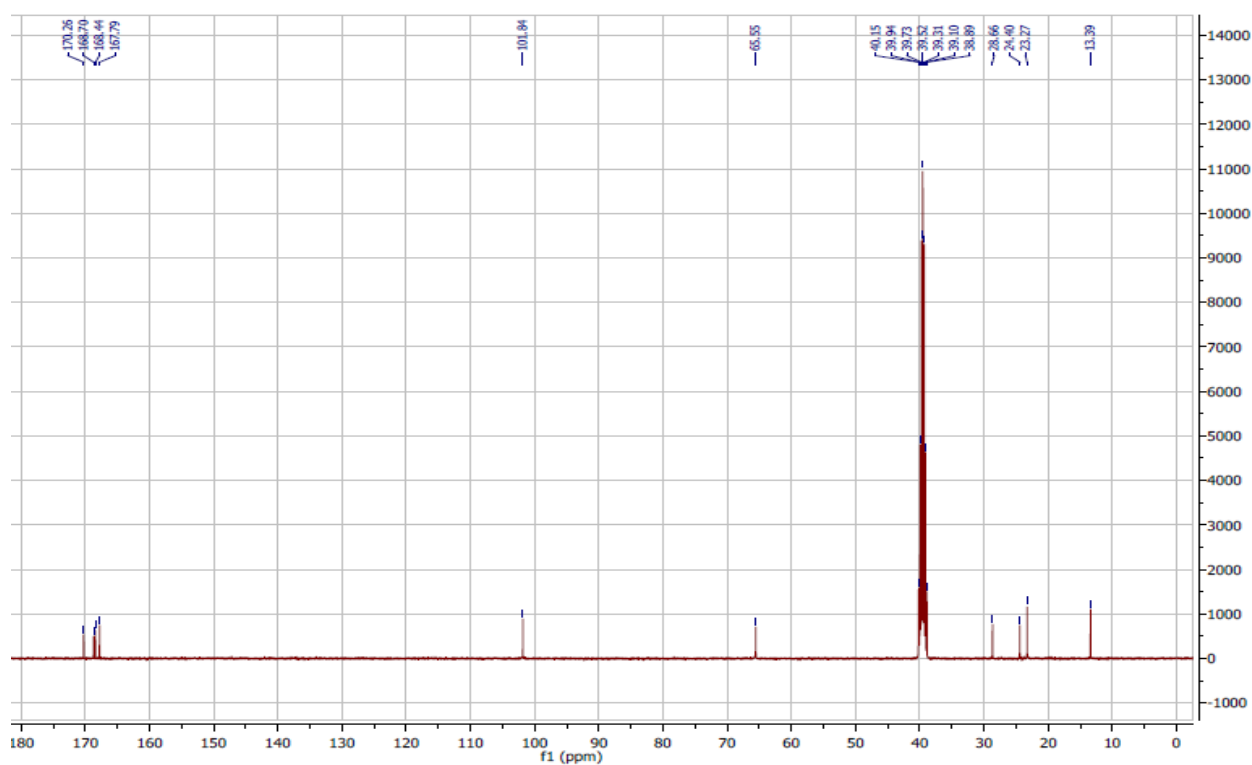

**Figure S54:**  $^{13}\text{C}$  NMR spectrum of compound **25** ( $\text{DMSO-}d_6$ ).

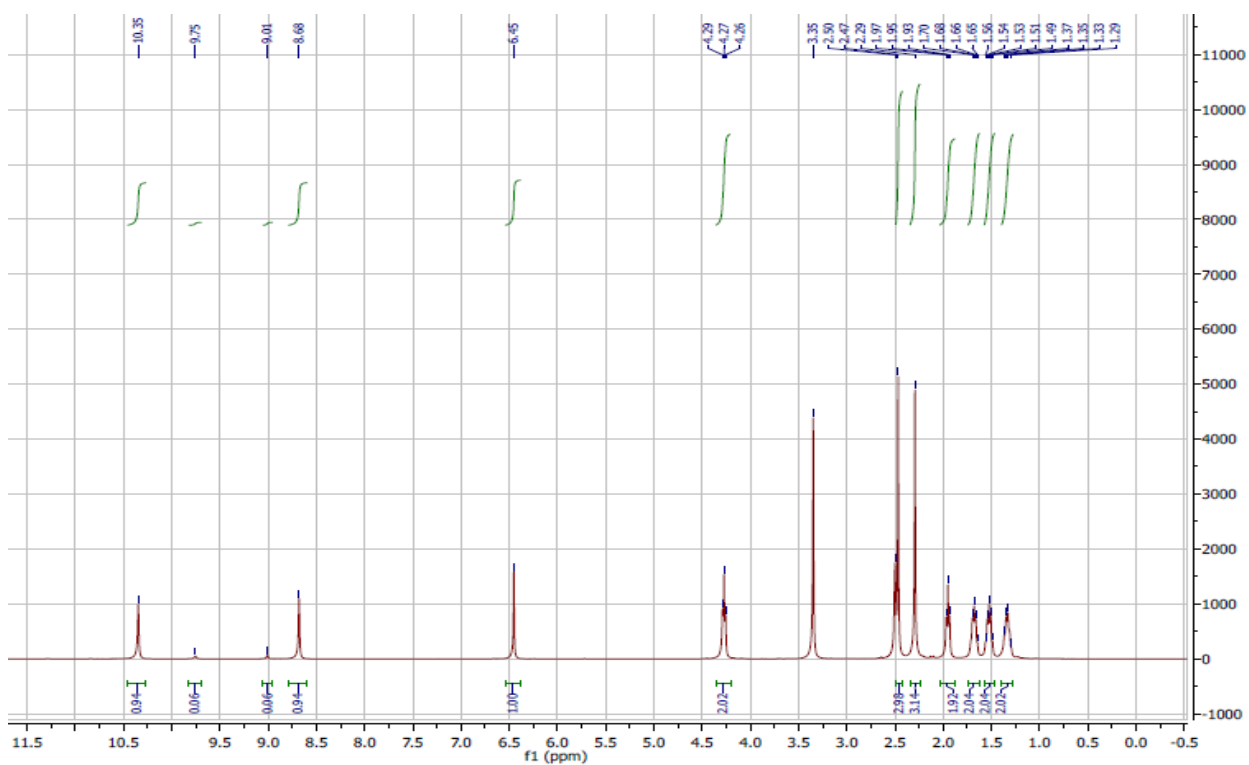

**Figure S55:**  $^1\text{H}$  NMR spectrum of compound **26** ( $\text{DMSO-}d_6$ ).

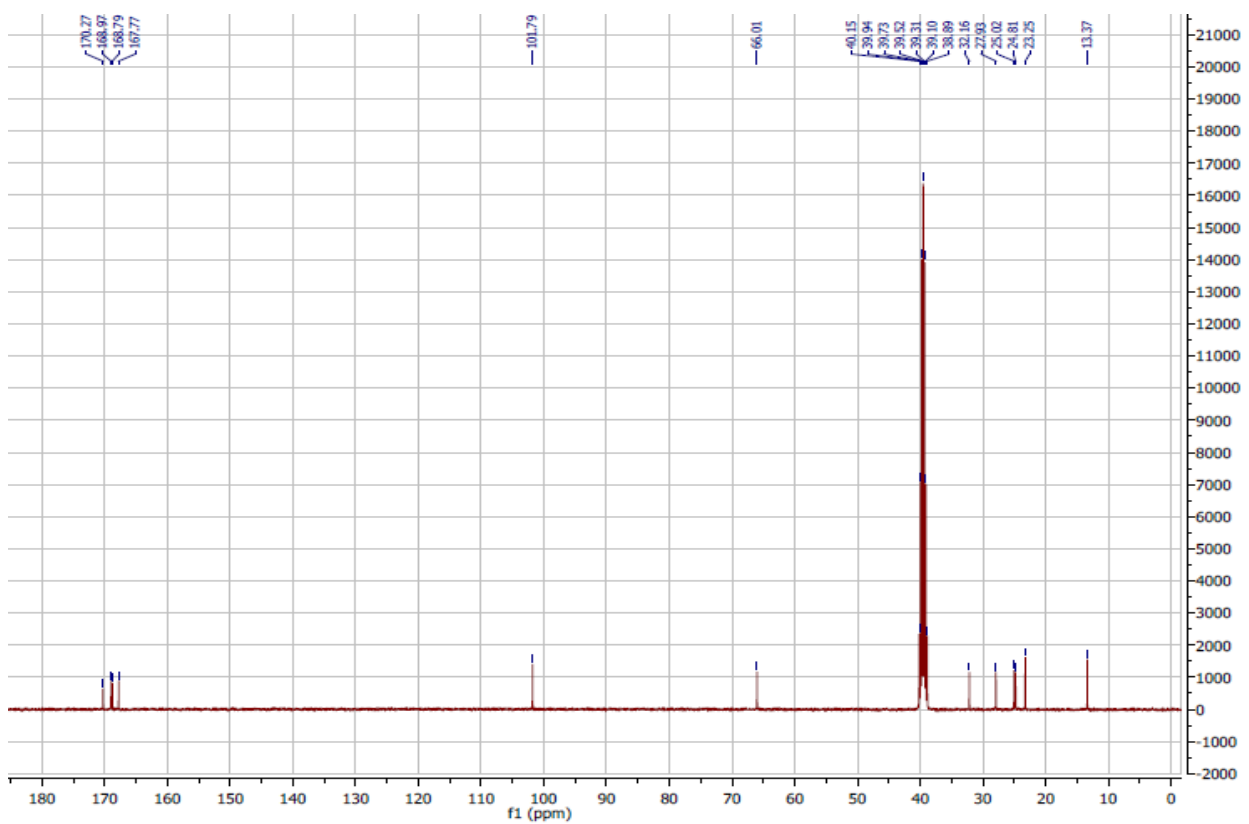

**Figure S56:**  $^{13}\text{C}$  NMR spectrum of compound **26** ( $\text{DMSO-}d_6$ ).

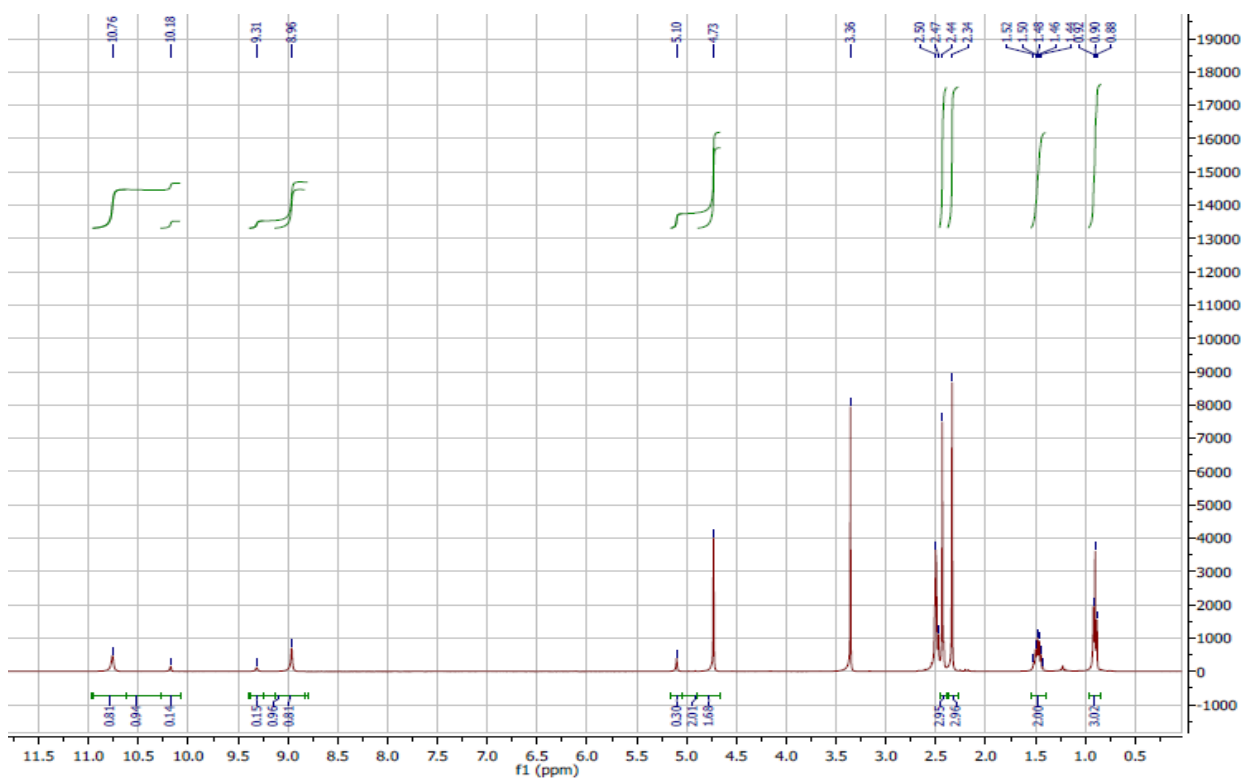

**Figure S57:**  $^1\text{H}$  NMR spectrum of compound **27** ( $\text{DMSO-}d_6$ ).

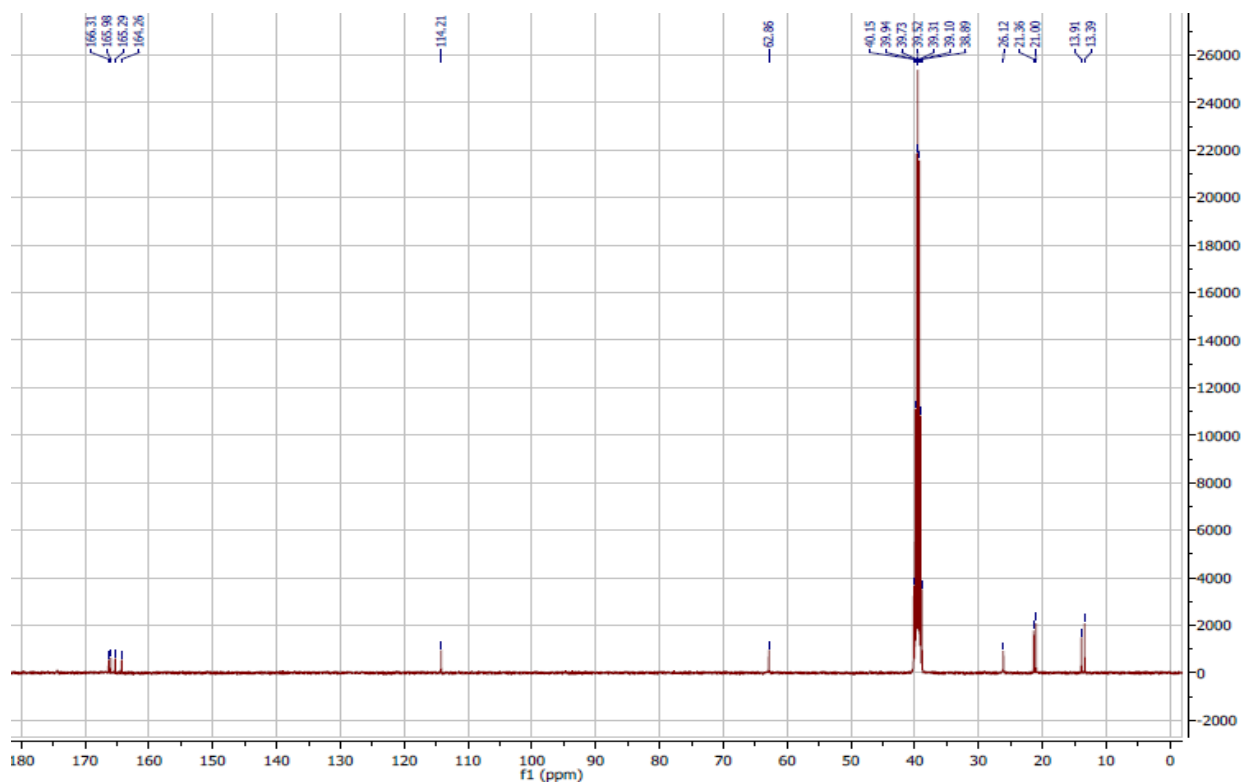

**Figure S58:**  $^{13}\text{C}$  NMR spectrum of compound **27** ( $\text{DMSO-}d_6$ ).

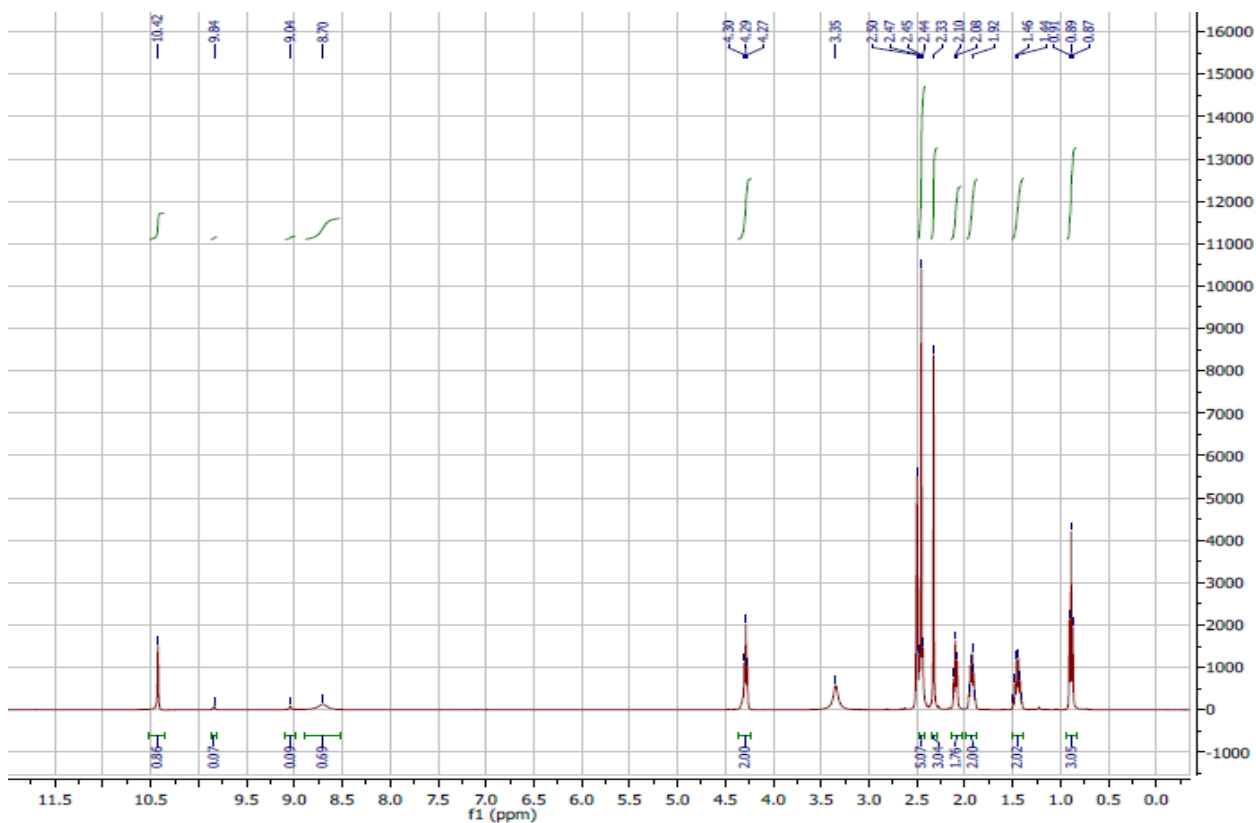

**Figure S59:**  $^1\text{H}$  NMR spectrum of compound **28** ( $\text{DMSO-}d_6$ ).

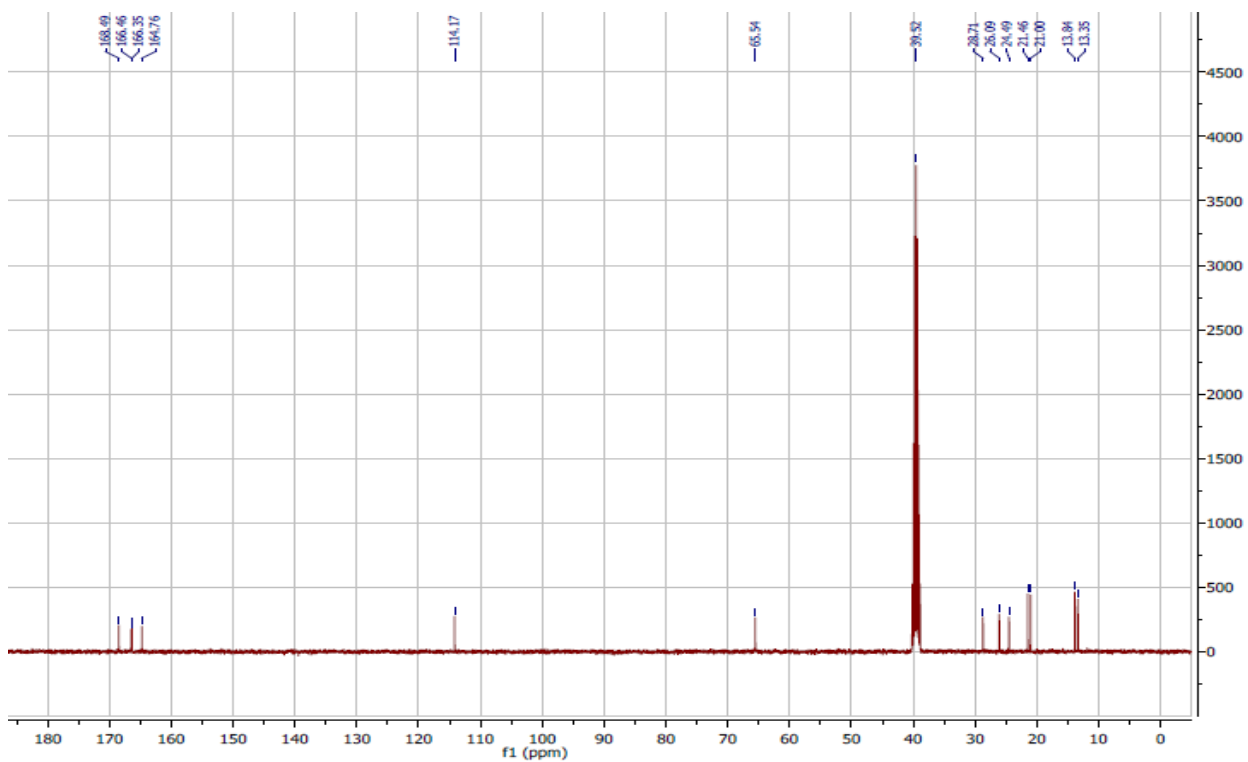

**Figure S60:**  $^{13}\text{C}$  NMR spectrum of compound **28** ( $\text{DMSO-}d_6$ ).

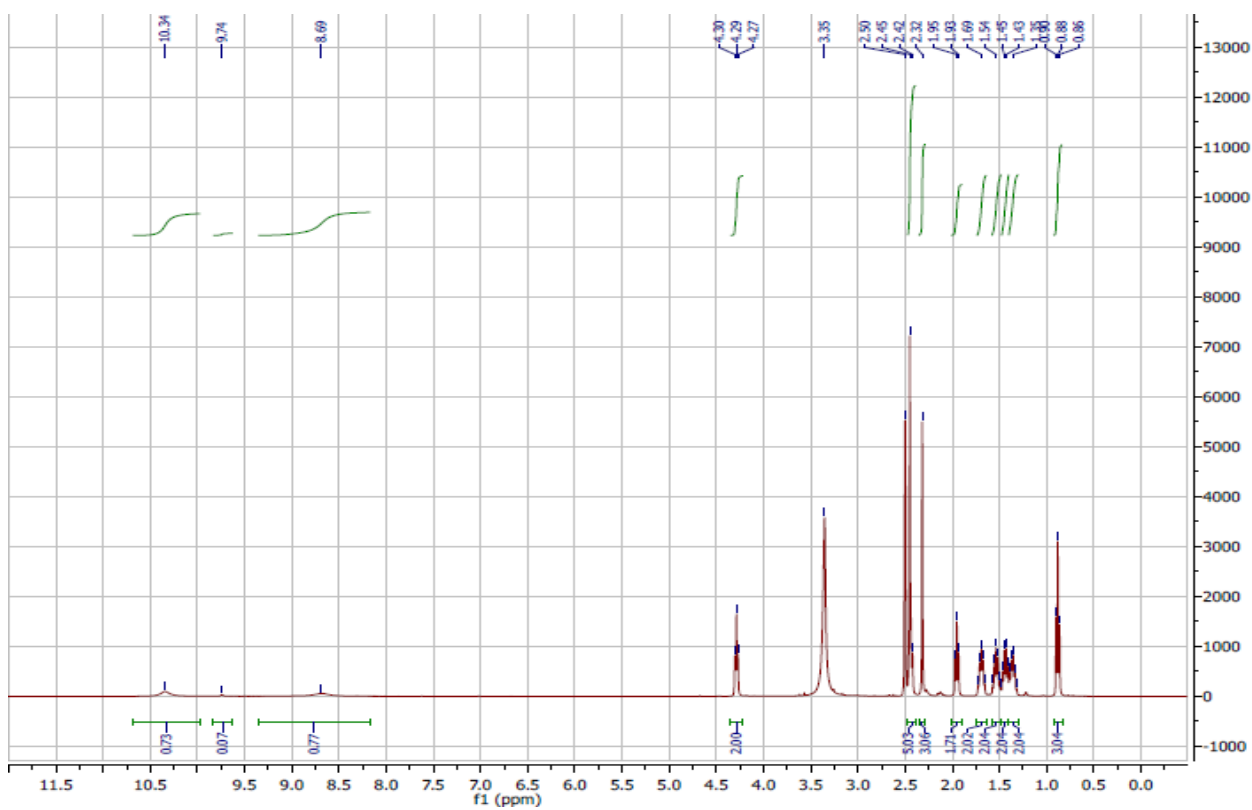

**Figure S61:**  $^1\text{H}$  NMR spectrum of compound **29** ( $\text{DMSO-}d_6$ ).

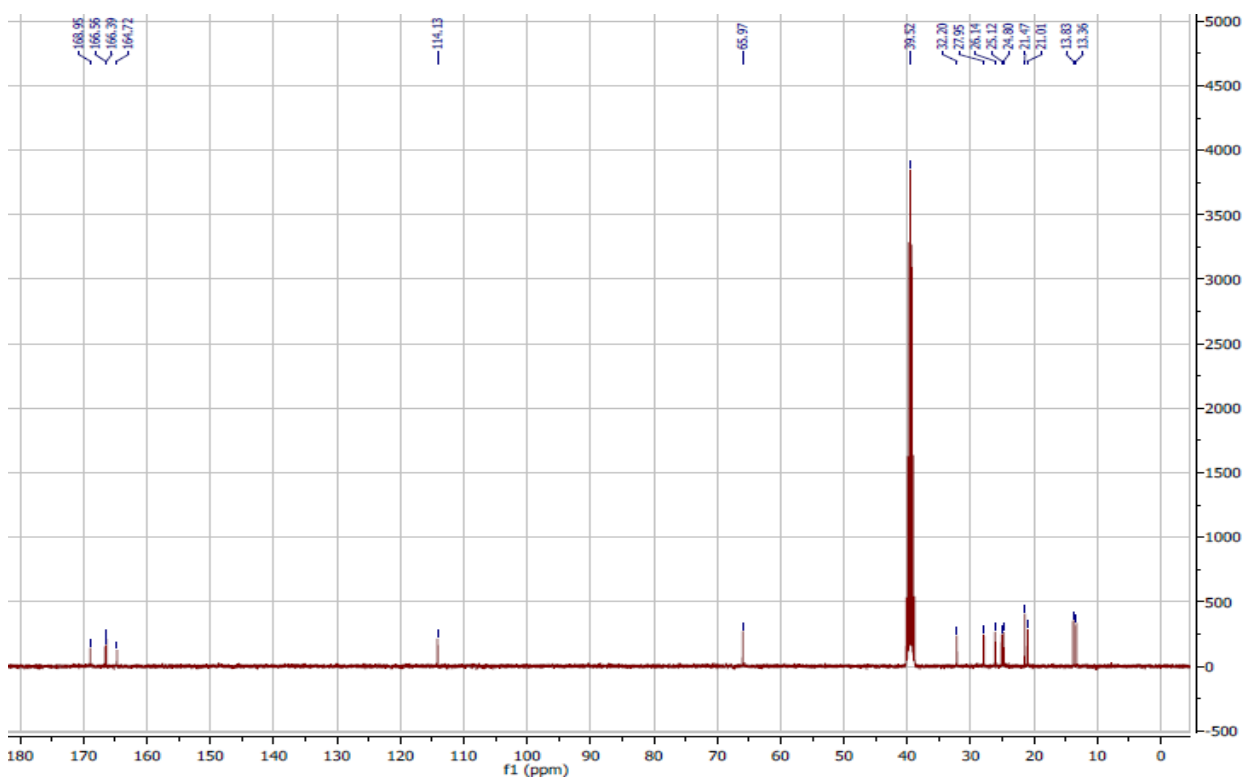

**Figure S62:**  $^{13}\text{C}$  NMR spectrum of compound **29** ( $\text{DMSO-}d_6$ ).

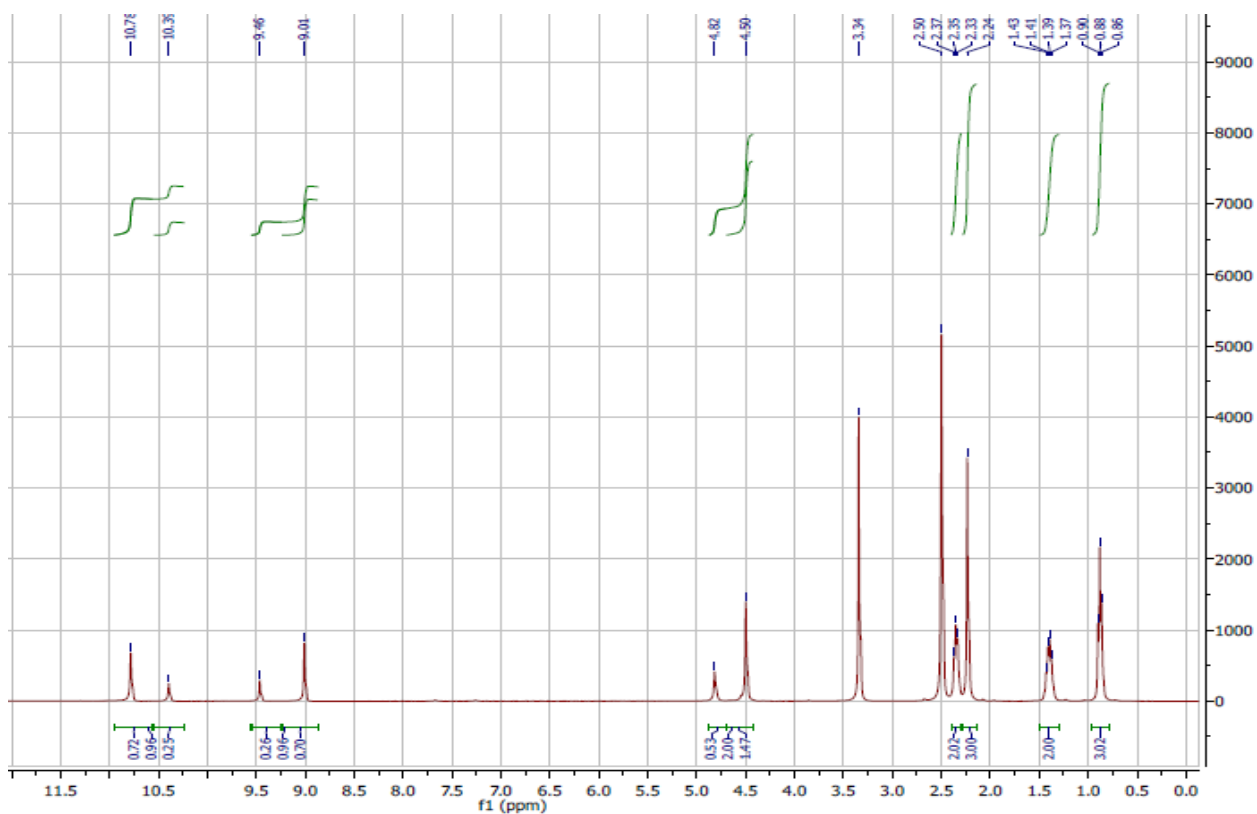

**Figure S63:**  $^1\text{H}$  NMR spectrum of compound **30** ( $\text{DMSO-}d_6$ ).

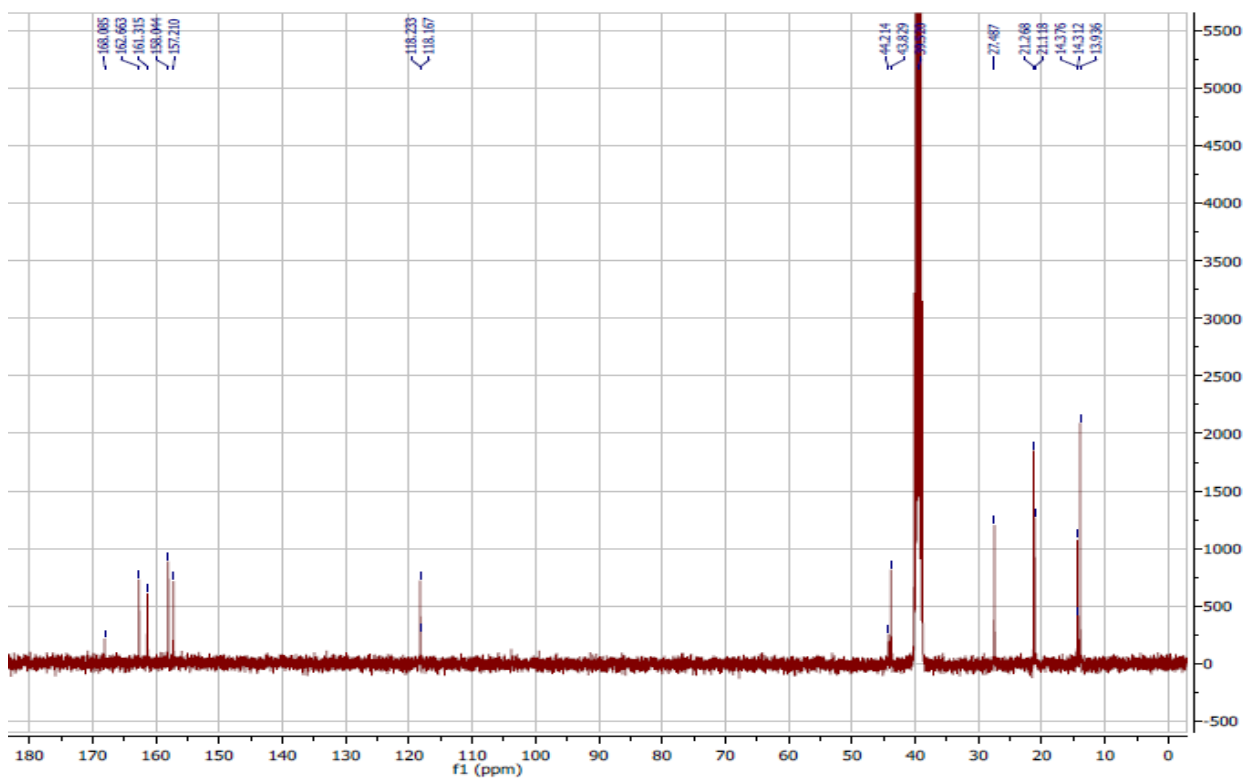

**Figure S64:**  $^{13}\text{C}$  NMR spectrum of compound **30** ( $\text{DMSO-}d_6$ ).



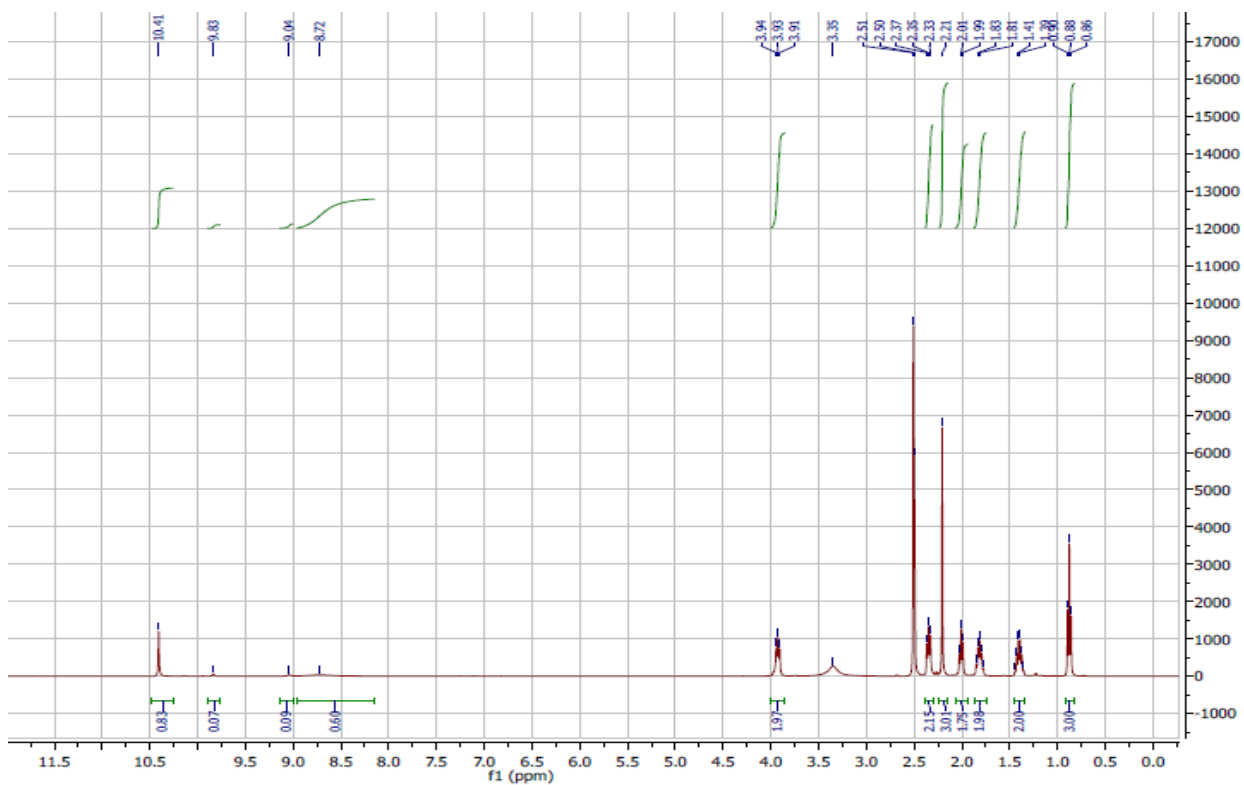

**Figure S65:**  $^1\text{H}$  NMR spectrum of compound **31** ( $\text{DMSO-}d_6$ ).

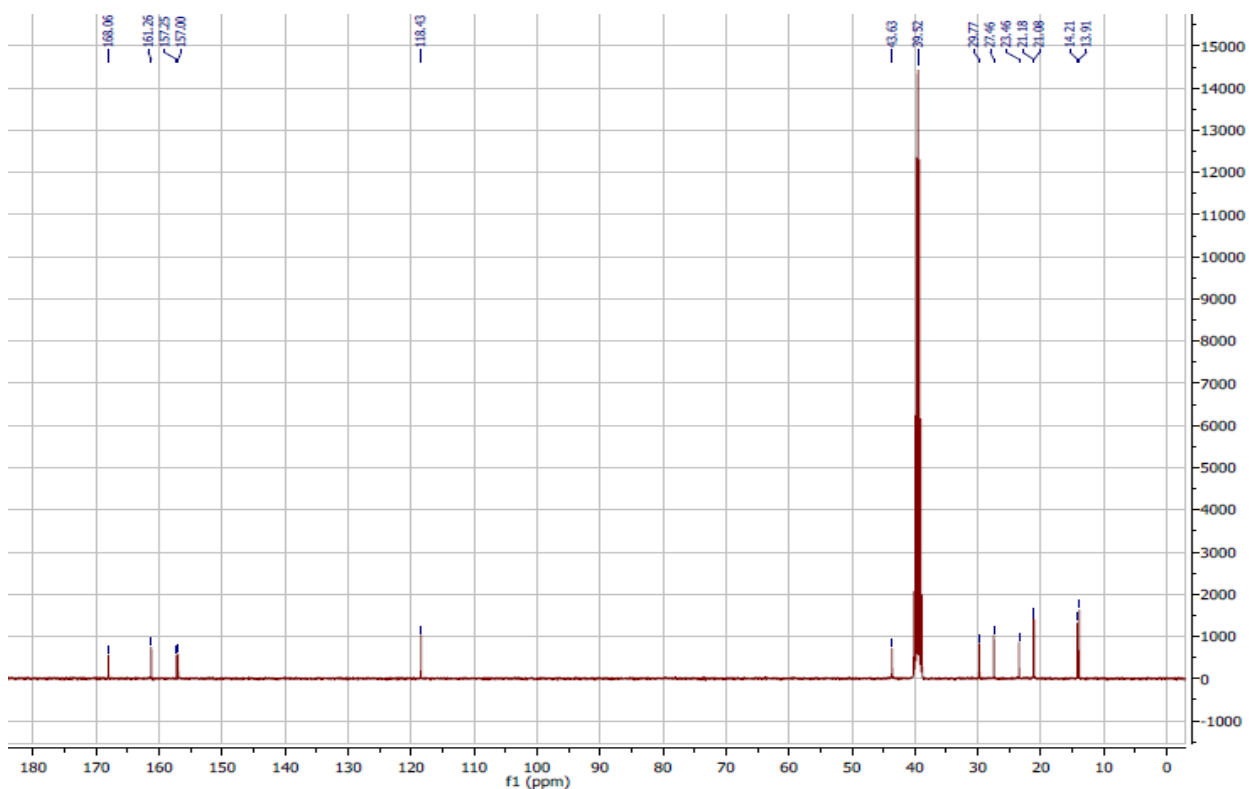

**Figure S66:**  $^{13}\text{C}$  NMR spectrum of compound **31** ( $\text{DMSO-}d_6$ ).
